# Supplementary material
Source: publisher figshare collection journal article supplement (https://gsajournals.figshare.com/ndownloader/files/25817282)
Supplement: Supplementary file 1 [file 25817282]

## Sheet: Read count
sgRNA	Brunello Library	D0	C1D7	C2D7	P1D7	P2D7	C1D14	C2D14	P1D14	P2D14
A1BG_CATCTTCTTTCACCTGAACG	883	839	519	414	385	489	234	224	430	193
A1BG_CTCCGGGGAGAACTCCGGCG	642	1370	1296	906	777	884	565	475	428	520
A1BG_TCTCCATGGTGCATCAGCAC	10	0	0	0	0	0	0	0	0	0
A1BG_TGGAAGTCCACTCCACTCAG	1058	1539	1525	1116	515	769	927	789	527	381
A1CF_ACAGGAAGAATTCAGTTATG	551	1115	913	582	488	442	636	528	527	263
A1CF_AGTTATGTTAGGTATACCCG	616	584	501	300	431	471	326	299	231	282
A1CF_CTTCATTTCCCAGCCACCAA	538	317	292	233	110	356	163	189	34	161
A1CF_GAATTCAACAATATCAAACC	504	196	77	39	120	85	26	57	92	40
A2ML1_AAATACTTACTGGTATCGAG	513	461	389	167	335	363	115	221	137	124
A2ML1_ACCCTGGTTACTGATAACAA	213	104	45	33	66	124	35	109	45	9
A2ML1_GGTGGATTATTACATCGACC	373	305	329	139	203	350	133	43	153	183
A2ML1_TGGTCACTACCCCTATCAAG	573	306	308	295	228	241	63	119	182	141
A2M_ACTGCATCTGTGCAAACGGG	606	554	500	244	392	408	244	361	182	95
A2M_ATGTCTCATGAACTACCCTG	995	682	825	680	575	504	382	347	253	248
A2M_TGAAATGAAACTTCACACTG	380	272	155	213	123	75	268	139	148	60
A2M_TTACTCATATAGGATCCCAA	653	101	246	187	69	180	89	114	71	104
A3GALT2_AAATAATGGGAGCCCCCCAG	354	566	668	512	438	528	387	441	1175	1028
A3GALT2_ACACGTAGTACATCACGCTC	1026	665	293	452	330	430	149	441	366	204
A3GALT2_AGAACATGAAGTGCGCCTCG	1029	1109	834	642	543	990	580	465	607	368
A3GALT2_GCGCTGGCAAGACGTGTCGA	863	937	1368	854	1013	656	922	814	519	664
A4GALT_AACGTGCCAGTAGATCATGA	480	214	151	92	274	153	166	240	77	16
A4GALT_AGGCCAGGAACGCGCCGTTG	360	531	172	404	137	143	203	281	113	182
A4GALT_CCACATGAGTGCGATCCTGG	557	415	133	339	295	276	104	118	81	82
A4GALT_GCCGCGTACCAGTCGGCCAG	131	396	241	250	270	101	248	191	70	351
A4GNT_ACGGAACAGGAGACCAAATG	508	296	657	448	199	255	639	711	298	212
A4GNT_CAGCCAAAAAGTTCTCCTCA	497	287	620	690	208	531	917	964	155	159
A4GNT_CAGCTCGGATGCATCCCGCC	455	447	356	98	198	182	321	175	70	60
A4GNT_TGCATTCCCACAAAAAGGGG	370	517	550	643	213	308	733	997	167	129
AAAS_CCCAGGGTGAGACAGCACTT	507	977	943	414	250	506	786	752	291	282
AAAS_GCCAAGACAGAGGCACTAAG	429	382	211	164	118	80	192	241	202	166
AAAS_GGCCCATCGACAGAGTGCCA	373	218	124	123	160	79	58	21	46	111
AAAS_TGACAGCGCCCTGATAGAGT	255	305	48	160	80	73	38	84	89	28
AACS_AGAGCTACGAGTATGTCTAC	516	563	247	274	220	379	193	169	75	129
AACS_CACATTCACACCGAAGTCCG	817	923	732	336	571	493	527	313	220	192
AACS_CATCCTCCTGTGCTACACCA	829	443	282	255	275	189	364	182	195	106
AACS_CTTCTCACGTGTGTATGATG	751	554	695	543	496	548	723	612	275	250
AADACL2_AAAGAAAGTCAGAAACCCGA	250	113	56	157	13	88	40	47	27	58
AADACL2_GAAAAAATTTGACTGCAGCA	146	151	89	60	70	99	59	4	27	50
AADACL2_GTGATGTATTCATCTGAAAG	229	406	442	239	98	166	239	123	127	137
AADACL2_TGGGGGCAATTTAGCAACAG	121	46	49	80	92	28	26	31	70	85
AADACL3_ACTTATGCTTAGGTAACTTG	393	517	381	187	184	126	429	207	151	17
AADACL3_CTGCGGTGACAGTTTCGGAG	296	302	160	139	189	201	93	59	122	105
AADACL3_GGCATCGTGTACTACCACGG	909	1139	771	549	353	454	629	655	216	101
AADACL3_TCGGGGTCATACTTTAGCGG	568	577	331	176	272	325	135	75	228	266
AADACL4_CAAGGTAGCAGGGATATCCG	294	733	529	335	406	656	335	263	189	727
AADACL4_GTAAACTCACCAAAGTGACC	529	254	233	133	184	103	146	99	93	283
AADACL4_TAGAAGATGATGCCTCGCCG	306	64	33	149	41	176	18	40	116	61
AADACL4_TATCGTCCCAAAACGCAGGT	454	316	311	328	170	308	168	159	152	91
AADAC_AAGTCTGAAGCACTAAGAAG	750	703	519	480	444	632	642	511	252	56
AADAC_ATGTATATAATGCCTTAAGG	502	460	137	190	221	156	76	44	86	135
AADAC_ATTTCTATCCAAATCACTCA	580	266	371	175	95	151	157	195	75	16
AADAC_GGTATTTCTGGAGATAGTGC	577	515	291	238	328	266	160	111	73	112
AADAT_AGATCCATTTGTCCTTGACT	347	198	392	178	150	148	200	302	554	578
AADAT_ATTGATACTTACCCAGCACT	561	396	160	459	304	376	187	419	227	115
AADAT_GTAGCTGACATATTGAGCAG	207	296	106	99	172	150	70	127	24	44
AADAT_TAATAATGTTGCAGCCCAGT	383	314	536	333	231	322	350	445	277	98
AAED1_CATCTGCAAGGAATACGTAG	610	175	140	111	115	186	40	115	52	110
AAED1_GACATGTTATGTCTTACCTG	565	557	223	269	270	346	402	145	184	81
AAED1_GTCATCCTACCATCATATTG	522	373	250	311	333	205	174	145	168	210
AAED1_TCCCGGAACAGCGCGCCGAA	400	420	391	398	299	363	398	568	215	206
AAGAB_AGCAGACATCAATCTATGTG	964	1319	735	921	743	1015	452	499	514	383
AAGAB_CAAGAATGGTGCATCAAACA	341	324	766	468	252	166	770	577	243	195
AAGAB_CACTACATTGGACCACACAT	363	246	47	46	91	3	51	69	44	85
AAGAB_GCCATGAGGAGACACTATCA	273	217	332	307	230	423	197	212	189	276
AAK1_CAAAACTCCTATTATCCACC	302	179	48	85	93	80	69	51	31	37
AAK1_CAAAAGGCCGGATATTTACC	271	376	244	324	252	280	90	54	155	68
AAK1_GGGTGCAATTGAAGTCTCTG	177	137	101	25	28	150	70	28	61	3
AAK1_TGGCAAAATCATCACTACGA	248	159	82	29	72	105	6	44	47	13
AAMDC_AAATTGCTTCCTTATCATGG	290	309	159	81	125	94	42	68	58	73
AAMDC_AAGTATGGCCAGGGGGTAGT	445	459	252	312	279	225	106	288	220	58
AAMDC_AGGTACTCCACAGTTGATGA	519	316	195	225	89	238	99	185	164	84
AAMDC_GATTGGCCGAGGGATGAGTG	427	676	381	424	433	181	259	180	274	264
AAMP_AAGATGACAAAGCCTTCGTA	814	632	217	228	242	267	110	95	230	221
AAMP_AGGTGACCTCGCTATCGTCG	1061	530	543	416	413	554	404	614	277	112
AAMP_TGAGTGGCCTCTTGAAAGTG	703	554	63	81	235	247	32	52	103	172
AAMP_TGGATGTGGAAAGTCCCGAA	288	298	212	192	114	184	148	83	68	36
AANAT_ACCTTCACGCTCGATCTCAA	726	286	207	241	170	168	94	117	15	47
AANAT_GCCCTCCTCGAACCAGCCCA	1189	1106	1044	963	670	991	637	618	397	256
AANAT_GGTGAGGCAGCGAAACTCAC	1141	692	701	723	649	372	614	544	273	128
AANAT_GTGGCGCCGCTGACAGCTCG	1481	1953	1479	1686	915	881	1160	1058	578	629
AAR2_CATGTTCAGGATGACCACAG	1244	1038	671	456	595	679	713	693	443	356
AAR2_CTTGGTTATCTCAGCTGGCG	828	832	666	335	411	418	428	241	223	213
AAR2_GGGGTAGATTCTGCCCCACG	538	1288	1902	1530	947	1317	2294	1657	1145	580
AAR2_TAAGGAAGAAACCCATACGA	603	374	126	65	81	166	88	61	105	91
AARD_GCAGAGCTGGACGGGCGTTG	332	388	317	253	291	372	87	185	229	305
AARD_GGGAAATTCTCTCTCTGCAG	243	157	141	107	113	256	139	144	154	55
AARD_GTCCCCGAAGAAGTCGCACG	533	808	276	672	341	350	377	227	242	132
AARD_TGCTGGAGGACCTCAGACGA	349	234	277	141	215	203	190	150	248	139
AARS2_AGCAAACTGGGGTCGCCGCG	338	306	254	277	191	117	266	223	181	201
AARS2_CCAACTTCTACGCAGAACAG	408	279	332	76	270	106	21	23	149	87
AARS2_GCTGAGCCAGTTCAGAAGCA	305	405	224	419	163	349	275	290	86	121
AARS2_TCGTAGTGGATCTCAGTACA	388	458	267	150	233	540	157	58	128	138
AARSD1_ACCTCCGCTCCCAATCTACC	492	203	629	396	183	217	329	155	179	98
AARSD1_CATTCGGGTTGTTAACATCG	354	173	207	208	258	276	114	170	236	189
AARSD1_CCCAGACAGAAATATCAGGT	308	111	34	33	143	105	116	108	80	90
AARSD1_GTGCTGAGAGTGACTCGCCG	462	698	1103	588	420	409	829	538	248	86
AARS_CCAAGAAAAGCATTGACACA	716	714	355	362	382	238	286	241	222	395
AARS_GGAGGCCAGATCTATGACGA	901	665	154	159	119	229	76	76	105	21
AARS_TCAGAATGTGCGTAGCTGTG	1742	975	157	150	304	391	62	114	249	132
AARS_TTGGTGCTGAGGATGCCGAT	1221	1130	894	637	388	462	714	769	342	117
AASDHPPT_AGGAAAACCAGTTCTTGCAA	593	344	132	136	208	358	85	18	156	153
AASDHPPT_CCCGAGGAGAAGGAGCGCAT	260	237	110	58	87	34	1	8	70	72
AASDHPPT_CTGCCAGCAGCCATTCGGCT	1197	1869	1778	1625	1507	1075	1339	1198	1102	427
AASDHPPT_GCTGAACCTGAGCTGCAAGT	671	584	427	385	313	563	247	109	338	263
AASDH_AAATGAGTTGATAATGACGG	944	1014	921	758	741	805	719	543	443	347
AASDH_GACAGTCAGATCAAACGTCA	238	81	66	0	29	113	42	61	55	2
AASDH_TGTGAATTGCCTGTACAACT	752	925	724	448	640	406	666	539	328	375
AASDH_TTGTTGGTACATCAGTACCT	556	534	325	228	333	479	83	255	246	42
AASS_AAGACCTCAGAAAAGTGTAT	328	352	307	110	142	223	197	134	105	146
AASS_CATCACAAACAAAGTTAACA	557	259	507	436	266	286	501	358	102	195
AASS_CGTGCTCAGTCACTTTCAAT	749	382	350	329	343	305	286	199	155	147
AASS_GGGTAGTGGCATTTGGACAG	573	651	388	449	261	416	168	209	302	150
AATF_AAACCACCTCTAGAAAAGCA	403	61	53	60	76	114	17	13	27	101
AATF_AGAAACTTTGACACTAGAGA	397	91	9	23	98	59	18	12	17	33
AATF_AGGCACTTAAAGCATTGTTG	579	534	213	258	421	467	151	153	166	236
AATF_GAATATGATGAGGACGACCT	592	246	114	78	315	259	34	129	289	625
AATK_AGCACCGGAACCACGCCCGG	1179	1406	791	583	664	914	808	844	498	437
AATK_CTCCTCAAGTCCACAGACGT	1030	1187	418	414	656	493	141	292	239	93
AATK_GCATAGCAACCTGCTCGTCG	405	75	205	97	187	176	137	74	229	33
AATK_GTGTCAGCCAACAACAACAG	684	275	247	265	167	474	193	289	80	98
ABAT_CCTTAAAGACCATCTTCATG	207	193	38	41	1	17	47	35	135	35
ABAT_GAAAGAAGTCATCGGATGCG	250	368	312	333	222	283	378	278	81	174
ABAT_GTGAATGGCTTTAGAGTGCG	407	296	332	236	324	419	184	177	6027	77
ABAT_TGCAATTACGAAGAGAGCCG	252	435	277	269	212	310	267	269	204	108
ABCA10_ACTCTCTGAAATAACTGACA	633	266	263	478	277	203	251	373	217	105
ABCA10_GACACTTCAGTGAATGCACG	1387	1564	1061	837	532	736	670	877	468	246
ABCA10_GGGTACTGAAGAGGATAAGT	216	98	128	77	161	93	20	82	132	32
ABCA10_TCCTTATTAAAACACTCATG	283	404	832	374	224	265	393	373	226	142
ABCA12_ACGGTCATATAATACACAAG	418	202	215	235	192	119	212	102	141	59
ABCA12_ATGGTGCTAAATGATCCTTG	713	643	1069	974	447	450	605	526	255	187
ABCA12_GAGGTGATACCCATCGCCAA	204	182	305	252	165	123	164	212	122	151
ABCA12_GGCAGCTATAAATACAACCC	349	479	199	260	171	226	255	261	131	133
ABCA13_ACAATTTAGCTGATTCGGCG	943	1549	1540	917	687	665	845	759	396	328
ABCA13_CAATGACTTCCATAATTGGG	644	604	377	507	373	538	413	354	429	163
ABCA13_GGCTTCATTTAATAACACTG	393	155	309	104	57	69	108	80	89	16
ABCA13_TATCAGGAAGACTTGCGAAG	780	752	825	405	438	455	748	395	171	219
ABCA1_AATGCAGAGAAAGCTATCTG	499	633	654	550	416	412	567	425	307	220
ABCA1_GGACACGCCCAGCTTCAAGT	608	484	299	244	219	348	476	394	260	117
ABCA1_GTGGCATGGCAGGACTACGT	226	397	182	89	353	115	27	141	15	71
ABCA1_TTGGACAGCCCAAGACATCG	530	388	472	236	196	142	161	220	118	269
ABCA2_CATGTACGTGGCGATCCGAG	1332	874	935	425	727	648	540	426	366	277
ABCA2_CTTGTGTGGCAACAACCGGT	132	265	231	149	33	36	164	104	35	63
ABCA2_GATGTCGTGCCCGTAGATGG	455	369	380	158	232	275	328	122	263	51
ABCA2_TAGGGGATGAAATTGCCACG	175	166	114	26	146	119	51	62	80	28
ABCA3_AATGCGCATTTACTGACCGA	1267	1108	1101	611	802	772	1061	683	68725	1424
ABCA3_ACCTACGGTTCAGTTACACA	502	243	236	193	235	100	262	385	119	38
ABCA3_AGTGGACGGGCATACATCAG	1007	1031	1067	694	762	703	479	518	569	803
ABCA3_CCTCCTGAGTCCCGTCAACG	408	516	493	448	404	332	302	280	77	157
ABCA4_AAAGACCGAGCCCCTAACAG	316	314	291	80	65	100	166	159	35	121
ABCA4_AGCACCATACCCGCAAACAG	195	82	110	27	65	44	56	35	73	29
ABCA4_AGGGTGTTGAGTTGCCACAG	259	508	129	151	192	257	91	98	71	47
ABCA4_GATCCGAATGGACATAGACG	231	319	71	334	158	120	196	219	114	87
ABCA5_AAAATGAATGATACCTCAGG	369	219	165	291	274	187	231	99	41	64
ABCA5_AAATTATGAGGAGTTATCAG	199	243	62	66	54	25	30	38	22	26
ABCA5_GAAATAGATACCTTTCCCCG	139	190	244	219	153	154	112	141	27	75
ABCA5_TGACAGTGACTATGTATCCG	351	277	391	243	321	413	324	486	525	588
ABCA6_AACCAATCACCCTGTGATGG	500	935	603	883	365	492	1042	634	353	281
ABCA6_CAGACAGCTGTGAGTGACAT	916	1928	1749	833	719	401	1141	906	665	632
ABCA6_GGCACCAAATAAAACACACA	437	141	149	236	91	242	198	167	105	160
ABCA6_TTGTATATGAGTCTCCTGAA	396	435	537	401	217	330	262	161	131	238
ABCA7_AGTACGGGATCCCTGAACCA	906	803	720	836	606	896	1078	1028	668	361
ABCA7_CTGGCCTAGACGTAACCCTA	387	478	349	367	306	215	433	209	115	50
ABCA7_TCAAACAGCACGTTGTACTG	472	315	51	240	152	142	17	84	89	63
ABCA7_TGGACATTGACGTGGTCACG	319	371	413	479	435	419	239	400	246	172
ABCA8_AAATTATCAGCCAAAAGCGA	236	23	85	77	73	41	36	47	44	1
ABCA8_CTGTTAATGTCACAAGAGAG	285	430	1007	535	689	479	790	484	156	279
ABCA8_GACACCCCCAAAAGACAGTG	344	597	504	259	296	388	159	197	91	194
ABCA8_GCAAATCTGCGCAATTGCAA	335	112	90	31	46	38	70	101	73	27
ABCA9_ATATCAGAAAAGTTACCCGT	187	171	128	26	94	24	101	21	4	13
ABCA9_CTTGATAGATGTTCTAACCA	201	257	166	68	48	73	64	35	2	1
ABCA9_TGGCAGGAAGAACAATCATG	679	477	317	228	252	264	191	188	142	131
ABCA9_TTATTTCTAACTAGACAGGA	488	271	304	135	127	139	116	49	40	67
ABCB10_ACAGCAATGATTGACACTGG	1009	607	239	458	321	452	210	254	431	127
ABCB10_CTCAGTGCCGTGTTTCTGTG	951	1444	1320	1471	987	685	2145	1229	375	478
ABCB10_GAGTTCACCCACGGTCATGT	1094	870	269	239	482	517	315	182	230	230
ABCB10_TATCGCCGTTCACTGGCCTG	1665	1909	1468	1183	1139	1446	1683	1506	414	363
ABCB11_GAGCTCCCCAGATTTAGCAA	243	295	570	372	170	211	370	226	235	83
ABCB11_GATTCTTTACTGGATTCGTG	813	804	539	408	507	699	384	333	208	369
ABCB11_TCAACATGGTCATTAAACCA	909	506	448	518	213	238	328	476	245	243
ABCB11_TTTCAGAATCCTCCTAACTG	875	910	388	499	336	523	323	121	244	202
ABCB1_ATTGACAGCTATTCGAAGAG	811	962	767	477	342	657	462	427	352	104
ABCB1_CTGGAGAGATCCTCACCAAG	279	290	316	299	141	158	342	263	229	143
ABCB1_TAGGTGATATCAATGATACA	369	205	253	298	188	225	124	368	165	53
ABCB1_TTTATAGTAGGATTTACACG	323	316	239	181	66	109	70	190	27	82
ABCB4_ACACCACTGAACTCAATACG	441	311	241	80	170	148	110	224	104	114
ABCB4_CATTTCGGACCGTAGACAGT	628	410	463	172	194	189	366	247	263	134
ABCB4_CCCTTCTCGAGCTAACGTCA	370	126	34	80	100	66	59	26	76	1
ABCB4_TGGCCGTGGAAATGTAACCA	288	367	254	288	237	98	279	241	38	57
ABCB5_AGACGTGGATAGAGTCACTA	23	0	0	0	0	0	0	0	0	0
ABCB5_CAAAGGTCGGACTACAATCG	839	789	572	609	540	405	383	360	277	297
ABCB5_GAAACCTTCGCAATAGCCCG	612	796	1037	980	437	908	826	476	401	333
ABCB5_TTTGGATTGGCAGATCATGG	382	316	498	163	245	195	194	218	81	209
ABCB6_CGAAGTGGAACGCTATCGAG	472	517	344	492	466	293	309	218	296	115
ABCB6_GCACGTAGGGAGAGATGCGA	874	955	657	448	430	451	498	619	396	168
ABCB6_GGAACGGGCACTCAATGTGT	494	543	567	303	348	290	450	284	188	190
ABCB6_TAGGTGCCAAACCAATTGAG	901	1143	1310	1211	837	866	801	878	634	404
ABCB7_AGTCATTAAAAAGTATCACA	201	62	51	59	16	56	39	36	35	1
ABCB7_CACACCACAGACAGCTACCG	1142	797	60	19	285	374	10	12	110	152
ABCB7_GATTAAATACCAAAGCACTC	453	190	167	132	185	231	54	68	109	76
ABCB7_TCACAGTTGCAGTCACACGG	415	174	2	3	142	92	36	7	69	16
ABCB8_AAGTACACAAGGGACCACGT	624	379	166	150	34	149	254	160	79	67
ABCB8_CCTGCCCAAACAGGACAGAG	508	442	344	420	153	246	257	295	124	143
ABCB8_CTTGGAACAAGGCGATGCCG	467	494	264	120	396	125	221	88	121	82
ABCB8_TCTTTGACGCCAATAAGACA	176	107	155	25	106	14	35	14	1	1
ABCB9_GCCCCAGACGTAGTACATGT	408	123	164	163	134	131	55	99	153	81
ABCB9_TGGACACCATCATGATGATG	661	717	482	368	536	453	333	243	197	270
ABCB9_TGTCCTGGGAGATTGTATGG	288	244	593	468	264	148	519	638	198	226
ABCB9_TTTGCCGCAGGTATTCGGGG	388	235	223	220	134	175	126	148	90	17
ABCC10_AAGGGTGTCACCCTTAGCGG	514	511	294	294	342	283	208	157	207	272
ABCC10_CAAGATGAGACCACCCACGA	270	232	178	200	152	56	47	152	132	130
ABCC10_CGTGTACCAAGCTTACTGGA	410	169	321	104	158	67	74	37	23	295
ABCC10_GGGCCCTGAGAATCCCAACA	153	230	213	220	175	270	134	102	44	86
ABCC11_AATACACATCACCTCAGGAG	588	312	165	72	180	209	116	158	60	2
ABCC11_CAAAGACCAGAGCTTTGCTG	629	690	823	709	532	678	489	470	352	344
ABCC11_GACGGTCGGAATAGACGGCG	820	1047	1428	902	748	923	1297	854	468	512
ABCC11_TAAGCTTTGGATCATGAGCG	494	402	369	123	409	268	206	177	106	164
ABCC12_AAAGACCATTAGGATCGGGA	828	725	264	468	333	574	458	288	162	152
ABCC12_ACGTACATTAAGGCTTCTGG	992	630	265	381	187	487	530	226	186	260
ABCC12_GAGTCATATGTCGACAATGG	1129	1072	860	644	546	883	560	533	441	347
ABCC12_GCCAACCCAGACTTTCCCAG	715	389	246	211	182	262	96	92	180	73
ABCC1_AAAATGTGATTGGCCCCAAG	600	597	445	257	428	568	336	235	279	468
ABCC1_AACCTGACAGCATCGAGCGA	1315	1406	1256	1050	666	1106	1695	1669	809	460
ABCC1_AGTACACGGAAAGCTTGACC	439	166	265	142	138	141	125	94	159	21
ABCC1_TCTGCTTCGTCAGTGGCATG	1236	1701	1337	912	692	591	841	1118	402	344
ABCC2_CAGAATTCATCACAAACGCA	321	193	167	153	82	197	96	96	43	12
ABCC2_CAGGGTATAAATCTTAGTGG	181	101	273	187	52	187	215	133	140	58
ABCC2_CATTATGGCAGGCCAACTTG	521	840	369	226	413	480	347	236	289	223
ABCC2_GATTGGTATATCGAACAGCA	378	42	86	227	140	134	70	79	45	62
ABCC3_CCACGTACACGTACACCCAG	888	599	757	378	498	463	598	321	1267	286
ABCC3_GCAGGGCGTACAGTCTTCGG	1054	696	784	550	531	592	349	377	305	349
ABCC3_GGCCACATGAGAGTCCACCG	452	425	155	225	367	283	249	118	195	140
ABCC3_TGAACCACCAGAAAAACAGG	205	49	18	1	56	126	27	12	27	29
ABCC4_AAGCACGGGTAAACCTTGCA	566	714	779	677	582	464	1411	804	377	238
ABCC4_CAGATTGACTATCTGGCCTG	345	554	398	189	263	261	436	251	222	106
ABCC4_GAAGGTACGATTCCTTAGTG	500	614	270	509	381	252	255	287	304	323
ABCC4_GCGTCACTGCCACGAACACG	376	203	231	205	174	146	146	214	135	113
ABCC5_TACGGAAAGAGGCACCCATG	600	724	853	684	680	727	540	869	234	298
ABCC5_TGAAAAGGGCCATAATAACC	284	376	129	186	127	112	474	892	12	178
ABCC5_TGTTAAGACTAGAGAGACTG	501	212	638	706	381	536	755	730	183	256
ABCC5_TTTATTCATAGAAATCCGCG	341	180	296	107	101	103	119	209	37	54
ABCC6_ACTATGATCCAATCAGCCTG	454	335	304	239	147	215	202	134	147	84
ABCC6_CAGACCACGATCCAGACGAG	533	478	235	182	139	281	137	101	74	121
ABCC6_GAGAACTGTGAGAGTCACAA	271	276	99	254	149	173	91	146	13	36
ABCC6_GGACAGCATCCAATACGGCA	561	253	216	59	215	78	85	112	128	54
ABCC8_CAGACCAACGAGATGCTCCG	487	379	95	366	165	210	111	109	112	139
ABCC8_CTACCGTCAAAGCTCTAGTG	237	171	263	452	301	325	292	356	127	44
ABCC8_GATGTTGTGATAGTAGACCA	414	560	497	650	414	390	403	428	253	162
ABCC8_TCAACGCCAGCGAATCAGTG	384	319	237	96	260	343	148	236	58	79
ABCC9_AGAGAGGAAAACTCTCCGAC	298	477	269	147	162	342	204	159	57	28
ABCC9_ATACACTATCGATGTTGTAG	1036	860	910	585	587	277	657	480	495	204
ABCC9_GACTGCAAATCTGACCACCG	318	297	222	180	179	177	130	76	142	122
ABCC9_TAAAGTACTGAATTGGCGCA	508	493	534	437	431	463	445	406	172	331
ABCD1_AGTTCCTCATGAAGTATGTG	678	741	538	573	448	429	533	555	217	190
ABCD1_CTACATGCACTCGCGTGTGG	1072	1024	1076	1031	709	501	997	690	246	321
ABCD1_GATCATGTCGTCGTACAAGG	943	584	513	496	366	292	587	529	294	232
ABCD1_GGCCACATACACCGACAGGA	860	477	218	170	284	243	219	146	175	276
ABCD2_ATTACCTCTCAGTGACACAT	912	306	239	334	288	308	262	237	78	117
ABCD2_CCCTGACCAATCTCTTACGG	599	289	270	416	174	328	358	246	166	39
ABCD2_CCTTATTGCACTGTTGACGA	951	668	626	589	632	508	377	435	204	221
ABCD2_CTGGAGCTGATGCTATTGAA	708	990	1116	677	560	800	698	688	671	443
ABCD3_AATTAAACTTACAAGAGGCA	334	248	176	163	153	140	156	98	125	13
ABCD3_ACTCGACTTCGAAGACCCAT	628	755	591	484	260	412	302	174	232	182
ABCD3_TGGCAAATATGAGCGCACAA	337	242	105	12	40	125	42	21	31	52
ABCD3_TGTGTACTCTTGAGATGTCG	562	372	158	144	123	171	148	71	3	85
ABCD4_AGCCACATCTGAGAGCGTCG	466	486	227	315	161	296	336	384	203	98
ABCD4_GATCCCCAGTCAGTACTATG	762	798	394	397	356	325	516	262	305	151
ABCD4_GTAGTAGACGAGGGTGAACG	593	556	574	267	312	246	409	485	240	181
ABCD4_TTGCGATGACAACGTAACTC	618	415	1029	578	475	375	693	393	463	240
ABCE1_AGTTGTCCTGTAGTTCGAAT	400	255	53	51	108	53	28	40	130	1
ABCE1_CAATTGATAAGGCGCCAAAG	838	811	371	307	394	503	262	203	303	415
ABCE1_CCAAAACTTCACCTGGACGA	786	342	63	46	177	79	1	7	64	50
ABCE1_TTTCAGATATATCATTGTGG	231	95	2	1	24	89	41	22	6	0
ABCF1_CTGCAGAGGCCAAAGCACGG	729	483	101	42	175	341	168	75	43	15
ABCF1_GATGGAGTATGAGCGCCAAG	898	668	352	259	229	343	114	67	227	62
ABCF1_GCAACACATCAATGTTGGGA	605	715	146	190	208	179	88	46	2	60
ABCF1_TGTAATTGCCCCTATAGTAG	623	568	221	76	230	440	46	14	95	70
ABCF2_AACCAATGAGGCCATAACGA	744	519	517	405	252	247	394	472	215	99
ABCF2_ATGATCAGTACGTGAAGACG	476	676	855	264	359	338	486	324	133	108
ABCF2_CAGTCCATGCAAGATCCGCG	578	517	168	384	233	256	387	409	209	122
ABCF2_GGGTCGTGAGCGATAAGGTG	640	547	312	285	485	247	432	348	247	297
ABCF3_ACTTCCAGGACTGCTAAAGA	293	401	373	244	93	170	122	316	118	54
ABCF3_CAGCGGCTAGATGGTTACCG	803	1071	1278	947	676	656	969	766	343	468
ABCF3_GCAGAGTGTTGTACATGCGC	917	753	186	356	265	390	193	207	261	319
ABCF3_TGCGAGAGGATTTGCTACGG	551	287	468	374	318	317	264	366	228	158
ABCG1_ATGAAAGGGCTCGCTCAAGG	290	445	309	408	293	241	279	392	176	211
ABCG1_CTTCAGGAACCGAATAGGAA	468	345	585	642	297	369	387	472	162	77
ABCG1_GACCACAAGAGAGACCTCGG	732	779	528	485	404	677	248	192	296	255
ABCG1_GAGGCCGATCCCAATGTGCG	317	404	385	191	273	225	214	220	175	67
ABCG2_AAAAAACGAACGGATTAACA	558	734	768	618	538	659	963	631	214	403
ABCG2_GAATTACATCAACTTTCCGG	745	457	370	345	323	545	531	398	118	116
ABCG2_GGAAGGCTCTATGATCTCTG	952	1049	752	641	587	616	448	577	386	332
ABCG2_TAACTTAGGATGTCTAAGCA	1269	1288	769	792	853	605	1189	797	388	307
ABCG4_CTCTGTGTCCCCAGTCATCG	1629	1824	1486	1131	1128	1070	1157	1042	769	624
ABCG4_GGTGGAGAGAACTACCTGGT	189	509	261	140	329	216	248	143	102	40
ABCG4_GTGGGACATGAACCGTAGGT	1024	1091	826	531	786	784	462	547	417	247
ABCG4_TGGAGCTGTCCTATTCCGTG	1373	1670	1676	1609	732	1052	1538	1438	576	555
ABCG5_ACACCTGAAAACGTTACCAA	361	116	55	188	65	78	91	39	73	48
ABCG5_GGCTCGCAGGAACCGAATTG	523	810	958	885	314	409	607	427	233	134
ABCG5_GGTGCTATCCAGGACCGCGT	438	305	161	149	153	202	92	70	169	135
ABCG5_TGATTGGCAACTACAGCTTG	644	877	629	409	591	684	291	200	242	405
ABCG8_CACCCCCATCTACTTAGGGG	712	1129	783	670	667	581	600	370	312	369
ABCG8_CAGTGCGCTGACACCCGCGT	1363	1157	241	629	769	817	317	392	453	309
ABCG8_CTCAAACCAAGGGACCTGAG	1095	1042	1052	829	558	632	677	948	425	207
ABCG8_GAGTCCTACGAAGATGCCTG	1190	1146	434	365	715	630	296	315	332	373
ABHD10_TAATTGATGACTTAGCTGAT	570	675	1024	836	460	459	625	653	361	151
ABHD10_TACCTCAGCGGGCGCCACGG	704	375	623	670	294	511	619	397	290	206
ABHD10_TCATATAAGAAAGATAGCCA	247	203	213	225	53	81	216	323	81	31
ABHD10_TGCACGACCAGAGAAGGTCG	392	279	243	255	196	241	530	184	176	63
ABHD11_ACGGTGGATGCTCGTAACCA	786	825	486	553	511	428	238	218	307	227
ABHD11_CTGCCACATAGGTTGCAAAG	804	672	507	411	371	528	166	108	237	335
ABHD11_GAGCCCGTGCAAAAAGACGA	776	433	115	229	211	321	44	80	252	277
ABHD11_GCTGTGGCCAACGACGACGC	1129	1081	541	271	684	615	166	262	180	397
ABHD12B_CCAAGACAATAGCATCAACT	403	204	291	184	150	174	189	150	187	138
ABHD12B_GTCTTGTCTGTTGACTACAG	516	726	587	567	392	438	380	399	166	220
ABHD12B_TAATTGGGTTCCCATCACGA	560	365	168	254	201	124	292	143	126	85
ABHD12B_TTGTGTCTATGAGTGGACCA	538	350	381	206	245	398	269	339	227	69
ABHD12_AGGTGACCACATGGTAACCA	390	559	306	355	267	294	301	467	206	221
ABHD12_CCTACGCCTGACGGGCCCGG	646	807	408	395	331	332	333	161	188	273
ABHD12_GAGTGGCCCCAGATGTACAC	934	566	695	454	450	639	466	265	517	161
ABHD12_GCAGGTACAGAATGATAGGG	319	231	181	88	141	159	196	139	80	41
ABHD13_AATAGCCACTGCTCCACCCA	1116	1256	1504	1052	885	902	1135	944	555	428
ABHD13_CATGGGAATGCAGGCAACAT	1194	1492	1012	1072	950	1195	1466	1184	571	618
ABHD13_GGGAACATAAAGACGTGAAG	570	337	311	152	221	177	89	150	58	201
ABHD13_TAGGATTTCAGCCATTATGG	665	939	633	679	438	500	390	473	329	146
ABHD14A_AGGCCTTTAACTCTCACACG	941	635	443	334	440	571	270	244	291	213
ABHD14A_CTGGCAGCCCCACATACAGT	1044	738	739	461	557	630	431	646	257	457
ABHD14A_GGAGGTACAGAATGCCGTGT	1214	848	646	523	355	498	768	446	290	331
ABHD14A_TCCCACTCAACCAGGCACAC	1387	1129	1066	928	1187	746	757	786	688	615
ABHD14B_AGAACCTGGGTACACTGCAC	1528	1367	1008	683	494	979	476	574	470	334
ABHD14B_GAGAGGCCCTGCCCGGCAGT	1432	1785	1049	1397	986	824	1031	872	433	454
ABHD14B_TGATGGACTGATCACAACCG	1000	775	651	567	663	689	432	446	474	199
ABHD14B_TGCAGGTCTGGGGCACTCCA	1616	1404	1135	869	749	1087	792	716	412	580
ABHD15_CAAACAAGGCTGCACCCTCC	896	1060	674	529	592	946	974	507	727	261
ABHD15_CTGGTGATCCCCAATGCGTG	344	427	259	246	162	246	333	400	168	152
ABHD15_GGCCGGCCTCGAACCACTCT	288	285	98	96	156	224	98	88	71	14
ABHD15_TGTATGTGACCGCCTCCTTG	1207	1021	803	512	822	580	585	349	454	314
ABHD16A_ACCATGTTTGTGGACCGGCG	920	870	1166	649	529	755	540	835	292	397
ABHD16A_ATCTACGCCTGGTCCATCGG	1118	734	962	672	700	741	852	770	449	536
ABHD16A_CCATCTTGGAAGCAACACAT	767	559	439	382	243	227	271	182	108	114
ABHD16A_CTCAGGAAGGAGTCTCGAGG	597	625	582	432	408	453	501	608	284	243
ABHD16B_CAGACCAGCCGTAGACCACC	373	329	285	204	209	195	209	195	96	93
ABHD16B_CATCTGCTGCGAAGGCAACG	395	430	145	186	185	130	178	179	292	22
ABHD16B_GCGCACGTCATCCCAGCGGA	500	578	378	281	199	238	151	173	198	162
ABHD16B_GGCCGCTGGCTCGTGTACCC	372	515	302	666	289	290	472	309	200	268
ABHD17A_ACCGTAGCCGGAGTAGTCGT	254	250	48	1	93	142	20	13	47	18
ABHD17A_AGGCTCTCAGGGTCCCCAAG	951	1334	645	652	447	732	311	419	584	412
ABHD17A_GCGCGAGCTGGACACCATCG	1004	726	392	421	344	295	111	89	307	164
ABHD17A_TACACGGTCCTCTTCTCGCA	638	278	48	56	110	166	13	55	84	254
ABHD17B_CTTGGCTTGCTCTTAGGACA	1266	1255	834	837	616	859	650	851	545	502
ABHD17B_GAGTAAAGTGTATTTCGCAT	787	676	609	478	528	474	752	234	136	202
ABHD17B_TATAGGGACAGTACCGTCTG	1195	1713	1529	1070	1155	1031	820	982	932	810
ABHD17B_TTCATGACTAGAACCAGTAA	623	476	310	249	202	286	290	295	210	181
ABHD17C_ACGCCGACATCGACGCCGCG	1058	526	961	917	688	662	540	857	758	376
ABHD17C_GCCGTATCCCGAGTAGTCGT	609	654	1122	1069	590	578	1273	1828	553	572
ABHD17C_GCGCGAGAAGAAGACCTCGA	673	488	801	544	449	464	608	632	270	247
ABHD17C_TCCCAATGCTCTGACCATAG	793	1333	1205	1106	698	883	1780	1675	573	516
ABHD1_AGCCCCTAGTCCTTTATCAG	297	467	117	234	115	116	227	144	72	18
ABHD1_GACCCTACCGTTCCACAAGT	473	444	267	371	204	268	221	311	66	2
ABHD1_GCTGTCGTGTTTAACAACCG	351	347	176	161	219	229	165	108	103	113
ABHD1_GGTGCAAGACGTATGTCTCC	499	581	268	217	246	363	229	209	133	292
ABHD2_AGGTGACCTACCTGTGCGAG	511	558	353	267	262	276	248	425	179	235
ABHD2_GCTCAGCCAAGGGCTCGAAG	440	324	905	436	429	506	543	661	169	76
ABHD2_GGGCGTAGTCAACGAAAGTG	255	492	369	246	288	412	124	295	110	190
ABHD2_TTTGCCCACAGGCTGCACGT	572	443	343	171	286	278	62	168	283	122
ABHD3_ACTCCTTGCTTGTTCCCGTG	572	643	747	310	380	640	577	480	221	146
ABHD3_GGGGGCTTCGAAGTGATGAA	303	428	232	280	100	162	121	136	67	111
ABHD3_GTCACTACTTCCAGACGCCA	692	227	337	109	92	253	71	139	95	31
ABHD3_TAGTACGTTTCTGTAACCAC	695	548	485	269	159	171	186	298	219	184
ABHD4_GACATCGATAGAGACATGGC	994	706	788	382	693	489	432	389	279	101
ABHD4_GCTACTCGAAGAACAGCCAA	294	190	181	154	128	47	102	213	120	198
ABHD4_GGAGGGATACATATCTGGCC	201	181	387	417	188	152	386	517	100	178
ABHD4_GGGGTGCACGGATCTCACTG	808	600	592	231	331	479	392	464	277	247
ABHD5_GGTCGTTCAGGGAAACCCCA	358	321	266	358	145	215	76	241	19	114
ABHD5_GTGGAGATGTGCCCTAGGAT	81	52	1	61	36	75	37	111	57	44
ABHD5_TAAGGTGTGATATAGACGTA	325	294	531	327	223	383	301	347	269	125
ABHD5_TTGGACGAAGTAGTAGACCC	568	487	330	341	188	285	392	439	94	110
ABHD6_AGTCTTCATGGTGAACATAG	316	131	81	100	81	102	94	104	14	77
ABHD6_CAAGGATATGTGGCTCAGTG	1068	1106	1115	511	879	545	563	352	614	350
ABHD6_CTGACAATCAATTTGTACAA	563	499	129	152	182	191	82	102	198	66
ABHD6_GCAAGTTAAGAGGATACACC	299	112	106	37	65	78	38	22	28	0
ABHD8_GATGAAAAAGAGCACCACGT	399	246	143	78	189	99	62	22	109	58
ABHD8_GCCGGGCTTGACCTCTACAA	492	523	425	499	338	525	602	349	336	226
ABHD8_GTACCCAGACCTAGTGCACA	723	948	422	550	459	314	319	315	201	334
ABHD8_TCACCGTGTACCGCAATGGG	541	311	353	231	394	280	107	149	171	64
ABI1_GAGTTACCAGAACCTGACTC	912	614	375	532	426	347	361	363	106	475
ABI1_GTTGTGTCGAGATATCTGCC	1085	794	845	709	542	447	704	491	332	318
ABI1_GTTTCCGAATATACCTTACA	526	355	281	386	388	249	200	152	211	166
ABI1_TCGCCACCCACTATTGGACC	763	673	688	475	567	546	476	364	395	429
ABI2_ACGAACTGGTCGTTCAAGGT	276	257	24	50	147	148	47	10	58	92
ABI2_CATACTCCCCCAACAATAGG	301	23	111	65	64	35	8	50	16	5
ABI2_TGCCTATCTGATAAACACCT	408	161	22	63	40	0	1	17	102	98
ABI2_TTACCTGGAAAGACACTGGG	417	200	133	198	126	124	100	142	69	260
ABI3BP_GAGATATCAGATTCCTACAC	382	374	435	388	185	107	273	212	141	140
ABI3BP_GGGATAGATGTAGTTTGCTG	269	172	129	31	86	50	83	78	71	80
ABI3BP_TCCTCATAAACCATACCCTG	232	162	2	167	93	75	16	11	74	92
ABI3BP_TCTAATGCACTAGACGTAGT	605	567	752	258	578	435	227	160	428	102
ABI3_CCTGTCTCGAAAGAGCATCA	670	381	278	192	309	134	254	188	94	148
ABI3_CGGGCACACTCTGCGCATGT	1651	2644	2361	1998	1580	1300	2664	2583	760	770
ABI3_GCGATGACCTTCTGGCCGGG	1291	1780	1554	1506	1092	1467	1531	1215	606	598
ABI3_TCAGGCCACAGACAAGCGGA	1208	1261	877	1005	475	1184	665	657	429	507
ABL1_CTTAGGCTATAATCACAATG	778	694	411	326	332	416	350	329	103	215
ABL1_GGTTCATCATCATTCAACGG	768	693	453	352	342	523	507	240	122	186
ABL1_TCAGTGATGATATAGAACGG	692	774	329	333	469	355	214	198	218	131
ABL1_TTGCTCCCTCGAAAAGAGCG	1446	778	877	565	688	548	387	480	353	329
ABL2_AACCTCTGTAATGACGACGG	503	246	164	238	272	294	175	95	72	109
ABL2_GGTTCAACATCACAACCATA	731	407	598	554	254	237	444	505	133	114
ABL2_TATCGAATGGAACAGCCTGA	587	189	88	41	113	265	170	134	200	99
ABL2_TGTACACCATCACTCCACAG	459	186	127	145	59	173	83	102	49	30
ABLIM1_TAAGCAATCTACGAAGACCG	405	480	333	194	198	438	294	228	112	172
ABLIM1_TCTAACTCCAACTTACGCTC	827	369	823	464	607	1039	719	1023	8867	5895
ABLIM1_TCTTTCGGACTGGACGACAT	746	696	209	263	226	524	147	195	228	332
ABLIM1_TGTTACATACACGCCCACGT	585	440	208	69	167	106	73	101	146	65
ABLIM2_AGGTCGGAGTGTAGCGCCCG	363	396	328	213	226	226	220	137	101	248
ABLIM2_CTTACATAAATCACACGGCT	478	293	130	82	114	46	89	67	80	51
ABLIM2_GCTGTGAGAAATACATCACG	267	281	447	366	101	224	434	381	76	110
ABLIM2_GTGAGTAGGAGATCATGTCG	380	295	199	377	85	177	275	82	65	139
ABLIM3_AGGTCACCTTGTCTCCAATG	1322	1450	786	642	606	584	533	447	412	297
ABLIM3_CAAGGTTAAGTCTATCTACG	764	707	441	295	488	474	499	375	236	329
ABLIM3_GGAAGTGGTTGTTGTGCACG	1666	1941	2813	2154	1541	1822	2348	2254	1463	664
ABLIM3_TGGGGGAGTCTATGTACCCC	768	1681	1068	904	771	1031	668	527	581	531
ABO_AGCCAAAGGTGCTGACACCG	497	245	156	299	211	257	162	204	151	134
ABO_ATGGAGTTCCGCGACCACGT	743	329	411	400	358	343	301	190	119	212
ABO_CCGGTCCCCAGCGTCACGCG	323	216	161	162	189	181	272	148	31	116
ABO_TGATCAGTGACTTCTGCGAG	921	917	1008	637	601	854	896	619	434	364
ABRACL_AAAGTTAAGCGTGAAATTTG	432	830	615	709	349	568	270	260	363	224
ABRACL_AGCAATGAATGTGGATCACG	493	616	278	281	346	327	148	100	191	241
ABRACL_CGAGGTTAACCTCTTAGTGG	393	546	538	591	314	367	289	333	281	202
ABRACL_GGTTGGCACATTTATCATCA	489	373	163	182	102	76	132	131	50	125
ABRA_CCTCAGCCACAGGTACGAGA	887	198	209	329	120	190	121	94	184	70
ABRA_CCTGGTGTCTGAGCTAACCA	935	996	527	614	420	554	619	422	185	252
ABRA_GAAAGAGGTGTCCAAAACGG	605	755	898	521	496	393	523	529	222	150
ABRA_GAATGCATTCACTTACTGGG	701	598	734	368	285	390	258	348	300	266
ABR_CAAGAGTGAAATCCAGAAGG	404	640	651	239	451	355	369	426	232	165
ABR_CTGCAGTGACAACGCCCAAG	333	390	176	197	151	140	110	157	172	188
ABR_GAGGCTTGACACTCACGTGT	433	236	209	199	225	216	114	52	127	115
ABR_TACTGTCCTCGGACTACGAG	389	704	927	432	433	606	795	908	291	317
ABT1_AAAAAAGCGGTCCTACACCA	414	204	102	5	126	40	54	8	20	27
ABT1_AGAACAGACACTAGATGCGG	375	293	190	62	144	73	88	123	19	24
ABT1_GACGCGTCCGACCTCGCCAT	759	292	19	20	84	182	2	12	81	156
ABT1_GTTCCAAAGATCATAACGGA	331	300	154	40	55	109	86	104	39	47
ABTB1_CGCACTTACTCGGAGCTCGG	466	243	329	131	263	347	223	238	77	164
ABTB1_CTACAAAGACCACGTCACTG	592	377	389	354	203	253	389	233	44	76
ABTB1_GGGCTCGGAAGTAGTCACTG	182	128	87	216	101	91	34	73	57	78
ABTB1_TGTAATCGCGTAGAGCCCGG	283	177	147	47	43	138	67	66	76	3
ABTB2_AGGGGCTGAAGTATGCGGGG	853	938	261	284	324	447	356	319	416	244
ABTB2_CCTCATCAACCAAGCCATCG	1182	1006	1288	631	723	369	1037	792	472	389
ABTB2_GAGGGCTCGGCAGTGAACGG	734	395	703	919	382	606	1049	784	190	194
ABTB2_TGTTCAAGGTCATTCTCGGG	994	713	692	497	293	404	208	303	204	263
ACAA1_AGCGCGAAGTAATATTTCCA	222	427	145	202	63	246	54	105	13	74
ACAA1_CTGCCGAGAGAAGCTCGTCG	551	653	557	420	400	474	331	323	219	199
ACAA1_GCCCTTGTCATCATGGACCG	532	240	516	368	330	334	332	285	417	126
ACAA1_TCAATAGACAGTGTTCGTCG	955	674	349	331	440	408	553	231	247	145
ACAA2_TACCTGACATCCATTCACAA	483	146	30	143	133	95	13	27	84	150
ACAA2_TAGCAGTGAAGTCTTTCAGA	410	457	586	630	486	277	543	372	107	137
ACAA2_TGTTACTGCAGGGAATGCAT	537	486	301	378	88	100	145	252	90	66
ACAA2_TTTCTGTAACTGTTCCAGGG	337	823	1071	848	248	355	851	685	159	280
ACACA_AATGCATGCGGTCTATCCGT	954	700	273	601	496	392	138	218	38	176
ACACA_CCAGAGTCCCACATTCCCTG	820	509	261	64	339	156	133	184	190	168
ACACA_TATTTGCCTAGGTACCGAAG	997	538	339	308	350	379	574	311	193	337
ACACA_TGATGGGTCCATGATAACCG	489	779	424	301	721	947	243	354	396	173
ACACB_AAAGCGTGTGACAAACTCAG	306	206	69	153	110	120	44	84	149	34
ACACB_ACAACGACATCGACACCGGG	865	520	217	259	446	553	247	181	84	142
ACACB_GAACTCGAATATGGCCAGCG	364	256	352	279	372	202	464	364	254	185
ACACB_GTCGGAGTCCATAATCCACA	372	542	714	626	223	317	703	583	58	82
ACAD10_AGCTCGATACTGCTTAACCC	401	147	51	2	93	86	36	34	19	21
ACAD10_ATCGCTTGTAGACTCCCTGT	447	379	117	264	126	337	81	91	90	124
ACAD10_CCAGCTCATACCTCAAGGGG	286	166	23	132	218	180	66	43	55	71
ACAD10_TCCAACTTACTACATCAGGC	609	284	307	198	155	140	124	247	155	80
ACAD11_CCACTCCGATAGCTGTTGCA	622	589	1477	940	499	479	1152	1274	280	359
ACAD11_CCTTGGCCAAAAGTAGAACA	275	350	129	241	214	196	211	78	15	44
ACAD11_CTGAGCCAATGTTTCTACCG	371	643	273	247	299	151	360	143	119	102
ACAD11_TTGTTTGTACAGACTCGGAA	338	125	124	167	195	133	110	200	86	157
ACAD8_CAAGGCTTCAAAAATGACAG	567	726	1283	989	439	566	1224	1311	409	143
ACAD8_GCTTCGGAAATGAGGAACAG	892	880	670	469	480	299	370	417	252	309
ACAD8_TCAGTCCTCTCACGGCAATG	1225	1353	1097	1063	807	686	524	628	361	331
ACAD8_TCGAAGATCACAGCTCGTGT	1462	1233	598	391	456	734	704	686	495	268
ACAD9_CACCATGTACTCAAGACTAG	722	844	913	751	538	511	740	518	251	56
ACAD9_CTTGCCTAAACTGGCGTCCG	1070	1303	782	896	849	1056	668	650	627	404
ACAD9_GAAGATAAATTAGGCATTCG	478	632	313	412	266	321	233	173	93	197
ACAD9_GGACTCCCGAAAAATTGACC	461	276	258	11	103	71	109	76	90	328
ACADL_CAGAAAAAGGCTAATACCAT	265	180	168	65	93	103	41	54	26	22
ACADL_CTCCTCCCAGACAATAGCTG	474	678	385	370	313	368	174	257	140	301
ACADL_GCCACTTACTCTGAGTGATG	416	474	795	279	199	235	312	262	160	241
ACADL_TAAAATGGGATTAAAAGCCC	184	299	194	153	144	92	155	186	114	69
ACADM_AAGATGTGGATAACCAACGG	291	452	526	382	380	366	505	274	221	329
ACADM_AATTGGCTTATGGATGTACA	538	530	749	353	163	186	287	405	209	151
ACADM_ATTGTGGAAGCAGATACCCC	237	212	37	31	36	10	16	13	48	14
ACADM_GTATTTGGGGAGAATGACTG	409	329	351	273	151	207	262	283	159	52
ACADSB_AGCCAAAGTTGATGCATCTG	354	436	266	374	295	161	243	163	187	85
ACADSB_ATGGAGAAATCAGTAATACA	232	146	332	133	124	33	83	145	119	75
ACADSB_ATTGAGTAGAGCTTCTGACT	260	329	322	264	192	271	258	270	122	72
ACADSB_TTCGAATGTTAACGGGCAGG	706	915	995	690	494	951	434	1007	326	137
ACADS_ACACACCATCTACCAGTCTG	1286	1358	1088	1141	867	803	757	1248	391	190
ACADS_GACACTCATGATGACTCCGG	749	389	263	228	275	279	11	31	143	27
ACADS_GGCAGGTACCTGGTTCGCTG	840	1234	1385	877	624	546	1273	1457	405	428
ACADS_TAAGGAACATCTCTTCCCAG	443	206	332	460	159	153	318	411	153	137
ACADVL_CACTAATCGTACCCAGTTTG	497	589	411	204	341	448	303	329	302	277
ACADVL_GTCTAACCGAGCCCTCAAGC	271	215	216	53	189	232	102	179	13	8
ACADVL_GTGGAGGAGACCACTTGGCA	343	449	111	184	190	106	88	43	131	111
ACADVL_TCCTGGTCAGAGCGTCAGAG	370	704	561	696	360	419	309	396	241	221
ACAN_CAGCGGTCACCTGCACGACG	394	503	603	478	229	241	304	571	495	277
ACAN_CCTGCGCTCCAATGACTCTG	389	288	447	376	350	152	289	214	104	99
ACAN_GAACCAGCCTATACCCCAGT	325	689	266	292	259	318	274	221	140	223
ACAN_GAGGGCAGTTCACCAACCGT	368	233	236	287	117	108	102	87	121	159
ACAP1_AGGTCTGCGGGGTTTCCGAG	755	1079	651	796	443	708	568	505	536	268
ACAP1_CAGAACCAAGCTTAAGAGAG	273	322	729	646	358	317	749	667	131	373
ACAP1_GTCACAAATGCCGACAACGA	365	154	1	12	16	17	1	22	0	0
ACAP1_TGCCGGAACACTGAATGCAG	942	458	342	214	369	236	76	168	96	68
ACAP2_ACTATAGGATAATCCGACTG	411	421	542	428	209	379	350	322	122	141
ACAP2_ATATATCAGAGCAAAATATG	390	170	215	89	54	92	41	96	70	74
ACAP2_TCCGGAGCACTCGATACACA	947	629	614	310	560	913	786	477	331	21598
ACAP2_TGAACTTGGACCCTACATGA	722	510	555	389	202	267	377	338	210	145
ACAP3_CCTCGCTATAGCAACTGTCA	958	469	312	555	264	365	449	366	224	241
ACAP3_CTCCACTTTGGACTCATCGT	876	717	293	413	393	433	292	282	407	373
ACAP3_CTGGATCAAGGACAAATACG	713	677	623	387	556	482	323	217	161	260
ACAP3_GTTCGCTGACAGCCTACAGG	1486	922	601	296	619	523	205	218	349	291
ACAT1_CTGCCTAAAAAAGATCCAAT	199	2	58	123	36	86	153	168	28	106
ACAT1_GAAGTGAAAGAAGCATACAT	211	243	132	130	43	126	75	23	65	1
ACAT1_GAGGATCAACACCATATGGT	722	1206	893	801	707	488	502	455	254	382
ACAT1_TTCTGCGCAGGATGTGATGG	840	972	691	411	381	547	730	527	299	124
ACAT2_CCTGTTAGACAAGCCAGTGT	297	194	253	76	75	142	16	95	88	60
ACAT2_GCAGTCCAGTCAATAGGGAT	399	451	375	350	310	245	176	337	118	53
ACAT2_GTTCTCAAGTAAGCCAAGTG	284	194	271	199	142	236	54	159	45	90
ACAT2_TCTATGTTGCTCCCATGGCG	486	707	908	560	772	305	457	706	408	724
ACBD3_AAGAGAACGTCTGCAAAAGG	722	735	381	244	327	169	366	259	207	188
ACBD3_ACATCAAAGAATCCAACCTC	443	71	151	38	93	18	3	34	45	90
ACBD3_GGGCCGCGACCGGATCCAGG	689	324	202	392	239	279	129	142	95	140
ACBD3_TGCGTCCCACAAAATAGAGA	446	285	83	96	64	134	82	139	89	26
ACBD4_ACCACTTATATCGTCCAATG	688	684	389	343	332	287	261	309	172	246
ACBD4_AGGTGATCCCTGACATGCCG	1293	482	1114	360	554	819	842	608	246	429
ACBD4_CAGGGAATCACAGAAAACCT	513	312	150	114	174	108	142	17	120	36
ACBD4_GTGATCGACACAGTGCCCCT	1451	1187	685	523	776	998	388	399	376	225
ACBD5_ACTGGGTGATATGACCAAAG	485	388	488	373	224	259	201	197	121	82
ACBD5_AGCCCATTGATGAAAACTTG	862	1335	1298	1189	568	861	1109	1332	658	600
ACBD5_AGGTAAAATAGTCCAACCTG	398	732	295	584	452	414	340	262	202	230
ACBD5_TGGTCATTCCAGTCAACCCA	904	856	632	438	530	342	497	332	196	191
ACBD6_AAATATATTTGATTACTGCA	655	250	180	97	160	146	124	115	111	147
ACBD6_AGCCATCAAATCGAAAAATG	698	964	1102	989	586	756	995	945	357	486
ACBD6_CCTCGATCTCAGGGCTATGG	1359	1070	1150	1037	997	715	1145	792	654	936
ACBD6_TTAAAAAACTAGATCCAGGT	599	477	215	253	269	247	197	203	139	221
ACBD7_ACAGGGCTGCAGAAGATGTG	1151	1330	1160	1140	868	971	1463	1071	619	481
ACBD7_CTGAAAGCAAGACCAGATGA	798	992	784	707	704	634	737	824	360	524
ACBD7_GAGAACTGAAAGAACTCTAT	485	481	400	217	235	294	418	294	95	168
ACBD7_GCAAAGCCAAATGGGAAGCA	623	429	778	573	355	506	549	331	365	448
ACCSL_AAGTGACATGAACTGCATTG	832	716	505	628	530	453	626	422	327	207
ACCSL_GATCAACCTCCTACAGTCTG	776	1189	1101	1063	621	789	920	718	495	455
ACCSL_TCCCACGGATGGATAGGTCG	998	991	1045	798	573	624	531	591	271	303
ACCSL_TCTTAGGGGAAAAAGGTCCG	295	385	355	322	386	319	191	304	160	409
ACCS_CCCAACAGACTTCTCAAACA	597	252	177	281	128	84	39	99	135	27
ACCS_GGGGAGTATACATCACCCAG	607	774	1119	952	554	841	1049	632	337	297
ACCS_TAGGTGGTTGTCCTGAATGG	853	1375	1115	1249	596	652	726	763	411	491
ACCS_TGTGATAGCGCCATAGTAAG	1178	1470	1953	1314	1375	1246	1666	1130	781	618
ACD_AAGCAGCGTGGCCCCGACGT	1788	1918	1002	1264	962	1025	1359	1222	539	749
ACD_AGATGCACAGCATTGAGCTG	1577	1331	646	608	764	901	504	522	721	764
ACD_ATCCGCTGGGTGTAGCCGTG	1240	1387	644	1084	1069	1288	853	537	254	692
ACD_GCTTCTGGATGAAATGCGGG	673	514	694	662	467	465	317	520	390	177
ACE2_AACATCTTCATGCCTATGTG	678	661	786	882	593	662	917	1025	1061	444
ACE2_CAGGATCCTTATGTGCACAA	410	405	167	96	131	148	130	107	54	91
ACE2_CCAAAGGCGAGAGATAGTTG	684	818	322	354	459	570	367	362	288	338
ACE2_TGCACAGAGAATATTCAAGG	267	245	435	170	166	136	356	252	85	59
ACER1_CCCAGACAACGTAAATGTAG	992	287	366	265	174	353	287	108	37	27
ACER1_GAAGACCAGGCGGATGAACT	153	127	140	244	103	209	154	167	170	144
ACER1_GGTGGCCGAGTTCTACAACA	58	109	0	16	8	29	8	60	0	0
ACER1_TGGACGAGATCGCCATCCTG	505	280	150	109	247	303	27	88	75	169
ACER2_ATACCTTCTGGGGAACCACA	341	161	261	199	261	87	174	117	170	129
ACER2_ATTCAGGGGTAGGTTCAAGG	187	214	223	17	100	155	38	139	105	48
ACER2_CATCTGACCCAAGAAACTAA	547	239	253	190	204	303	138	104	46	208
ACER2_TATCGCCGAGTTCTACAACA	983	527	589	501	481	508	663	490	237	171
ACER3_AAAAGAGCCGATATTCCATC	546	996	875	887	337	553	823	879	259	211
ACER3_CTCGGCGATGTACCAGGTCA	440	668	391	432	299	472	461	120	245	138
ACER3_TAAGCCATGGATAAACCCTG	325	236	131	158	97	141	168	162	50	109
ACER3_TATTAAACTGAATAGAACTA	227	41	95	1	13	0	88	21	1	5
ACE_GGAAAACATCTACGACATGG	819	249	212	139	127	192	75	67	116	46
ACE_GGTGTGGAACGAGTATGCCG	226	166	170	77	129	49	67	13	84	153
ACE_GTTGTAGAAGTCCCAAGCCG	595	662	322	344	246	255	171	106	158	265
ACE_GTTTCGTTTCGGGTAACAGG	686	656	476	240	266	368	628	465	178	286
ACHE_GGTGTCCATGAACTACCGGG	394	327	214	156	156	271	277	298	236	76
ACHE_TATGTGGACACCCTATACCC	349	231	177	271	208	367	122	206	127	194
ACHE_TGGTGGGAATGACACAGAGC	493	111	73	86	132	64	38	13	47	51
ACHE_TGTCCTCGTCTGGATCTATG	569	359	204	157	206	114	60	135	169	204
ACIN1_CCTGGTCAAGCGGCTCAAAG	643	415	441	523	311	380	231	295	107	165
ACIN1_CGTACTCATGCCAACCCTCG	565	691	462	193	260	180	292	165	230	181
ACIN1_GAGGAATTAGCACTGGCCAA	769	751	315	415	500	440	281	454	294	456
ACIN1_TGAGGGACAAAAATCTAGGG	383	692	714	750	357	533	622	904	292	289
ACKR1_AGCTAGGATACCCAGGACAC	280	98	47	53	101	26	32	93	76	97
ACKR1_CAATGGCAACAAGACAAAGA	449	170	380	229	304	248	131	187	203	39
ACKR1_CTGCACCCTGATATACAGCA	316	176	0	21	99	34	47	61	22	1
ACKR1_GAAGGAATCATTCACACCAT	359	252	143	281	197	200	342	570	89	188
ACKR2_ATCTCAACCATCCGCCTGCG	1061	864	405	430	681	576	406	355	265	240
ACKR2_CAGCCCATACTATGGTAGCA	1085	1303	1484	1182	793	966	1526	1282	796	302
ACKR2_CATGCCCGCCGAAATCTGCG	1181	1201	1242	1003	711	657	1013	749	210	428
ACKR2_GGAGTGGAAGGAGAAACCCT	614	461	202	89	176	242	60	24	148	136
ACKR3_AAGACAGCGATAATGGAGAA	648	944	989	832	569	490	870	798	328	487
ACKR3_CCAACAATGAGACCTACTGC	404	314	192	142	100	147	179	127	45	94
ACKR3_GCACTGCTACATCTTGAACC	542	163	229	186	128	123	165	105	49	126
ACKR3_GGTCCACGCTCATGCACGTG	1457	1701	1048	653	894	698	654	705	540	495
ACKR4_AGTCCCCAGCCAATCAGGAG	1034	869	764	609	714	567	254	416	423	195
ACKR4_ATTGATGTTCCTAGGTAGCG	1707	1836	1788	1970	1034	1276	1910	1276	699	908
ACKR4_CAATGACGAAAACTATTGTG	811	1420	1192	1153	673	765	745	788	308	409
ACKR4_TGTGCTACTTTATCACAGCA	1087	548	515	450	495	632	398	360	202	252
ACLY_AGAGCAATTCGAGATTACCA	320	176	0	2	60	70	6	10	45	34
ACLY_CGGTCACCTGTACACGACAG	417	389	18	203	179	196	6	26	98	69
ACLY_GACCAGCTGATCAAACGTCG	503	189	166	133	265	285	95	118	179	213
ACLY_GCCAGCGGGAGCACATCGGT	198	35	17	32	128	16	1	2	51	1
ACMSD_AGTGGTGCGAGAGAATTGCT	210	439	736	367	165	332	394	467	128	1506
ACMSD_CCTCCTGGGGTAGCTCACAA	840	984	1010	975	927	1092	1065	1013	554	575
ACMSD_CGAGTGGGACCTGAACGCGC	653	360	389	348	272	256	564	725	121	49
ACMSD_CTGCAGAGGTTTGGCTACGG	172	116	11	63	84	98	22	13	108	38
ACO1_CCTGCCCCTAACATCACAGA	510	155	184	93	142	87	37	27	18	54
ACO1_CTTGGTGTCTAGGTTTGACG	442	573	623	153	478	126	178	364	253	41
ACO1_TTATTACCCAGACAGCCTCG	328	144	116	177	128	260	163	156	47	64
ACO1_TTGCATATGCTATTACTAAG	358	90	262	119	123	40	79	76	3	54
ACO2_ATCTTCTCCGAGAGTGTCAG	1149	986	930	806	734	1037	535	620	578	257
ACO2_GTCTCAATAGGACATCAACC	1075	858	448	294	538	262	181	59	279	70
ACO2_GTGCAGCTACCAATTAGACC	1144	788	478	186	294	387	114	188	195	197
ACO2_TCTCGGGGTTTGCGTCGTTG	55	0	28	13	29	19	1	48	1	0
ACOT11_AGCTGAAGCAGATCACGCCG	1458	571	360	501	401	687	194	355	179	171
ACOT11_ATCTGCGTCCAGGACCACAA	1343	846	744	388	718	550	508	478	644	395
ACOT11_GCCAACTGCGCCATTCAGGG	1184	832	839	847	555	558	715	625	253	279
ACOT11_GGGATACCGGAACCCCACGG	601	743	336	435	355	264	450	351	243	178
ACOT12_AGCATTCAGCACAAGCATGG	533	102	120	88	76	84	77	52	23	31
ACOT12_CCACCCCATGCAAACCATCA	579	287	117	166	135	159	72	132	14	115
ACOT12_GATGATTTCAGACGCTATCG	381	427	381	503	355	338	370	257	513	88
ACOT12_GTAGATATGTTTAAGTTCCG	484	568	606	630	695	420	531	439	511	437
ACOT13_ACGTGGCTGTCAAACCGCCG	320	312	129	189	194	119	142	270	87	15
ACOT13_AGTAGATAACATATCAACAA	231	49	19	29	8	31	38	0	1	0
ACOT13_GGTGATAAAGGCCATGACCA	321	371	268	217	196	132	249	237	93	80
ACOT13_GTTCATATCGACACTGACTC	659	363	302	243	294	295	178	204	191	163
ACOT1_ACAATGCCAGGAAAGGGCCC	575	1090	438	511	454	672	450	493	321	330
ACOT1_AGCCCGAGAAACCCTTGGTG	161	470	120	194	257	139	118	83	173	130
ACOT1_CTACTTGCTCAGTCATCCTG	409	323	192	172	342	180	93	204	133	153
ACOT1_GGGGGAACCTTACGCTACAA	208	170	249	283	122	229	191	163	104	99
ACOT2_AGATCATTAGGGTTCCTGCT	1069	1340	1113	761	948	679	765	812	552	416
ACOT2_CTACTTGCTCAGTCATCCCG	1475	1089	1215	723	657	808	947	1170	513	562
ACOT2_GCTCGCCAAGAGTGTCGGCG	1071	1021	672	398	614	466	390	378	233	178
ACOT2_GGTACAGCCGGGACGCTCGA	1206	1802	1988	1424	1014	1267	1513	1520	411	923
ACOT4_ATAATAAGCTAGAGCCAACG	337	427	243	260	108	239	115	265	102	107
ACOT4_ATGTCAATGATCCCTGGGAA	485	899	1015	508	461	535	392	538	229	169
ACOT4_CAGTTTCCATCAATGGATCT	736	1535	1304	732	601	827	962	960	254	659
ACOT4_TCGCGGGACTCGAGCCCATG	752	756	303	245	298	256	202	185	180	122
ACOT6_ACAGGCATTGATAAGTACAG	1033	652	432	406	313	259	252	240	197	198
ACOT6_ATCATATCCTTGTAATGTAG	1602	482	602	473	283	628	511	392	79	185
ACOT6_CTGAAAGGCTACAAGCTCAT	1132	1184	1465	729	662	863	1579	1232	677	668
ACOT6_TTGGCATGGATGATCAAAGC	1026	761	730	668	357	706	1048	1022	744	583
ACOT7_AGCGCATGGAGACCAAGTGG	351	252	111	228	225	160	238	284	118	38
ACOT7_CAGGGGCACATACCACAGGG	353	482	562	333	335	318	638	272	212	164
ACOT7_GCGGCCAGATGATGCCAACG	112	176	21	2	121	26	3	1	54	17
ACOT7_GTCTCCCATGTGCATCGGTG	386	254	160	184	147	380	252	216	275	104
ACOT8_ATTACTGGGTACCGGCCAAG	359	432	283	268	274	214	272	314	245	187
ACOT8_CCTTAAATACTGGTCAATGA	280	121	71	117	70	45	15	38	87	109
ACOT8_TCGTGACCAAGACGCTACGG	302	262	185	449	266	304	205	219	138	33
ACOT8_TTACTGGCTTGATCTCAATG	792	1029	869	781	591	720	578	633	168	174
ACOT9_AAGAGGAGCTCTTTAGACAA	748	1054	770	696	620	690	411	481	316	157
ACOT9_CTTACCAATCTTATCCACCA	862	304	279	193	194	275	31	95	169	126
ACOT9_GAGAAACATCTCATGTATGG	908	820	528	449	429	419	279	333	155	239
ACOT9_TCTTCCCGACCCAGCTAACA	992	978	890	842	803	757	1078	1198	522	332
ACOX1_ACCTATCACCGGATTAACGA	829	353	124	269	119	197	113	58	102	216
ACOX1_CTGTGGTTTCCAAGCCTCGA	729	1203	1268	988	572	817	1254	1320	301	407
ACOX1_GCGCCGCCGAGAGATCGGTG	570	662	706	387	264	321	357	296	263	190
ACOX1_TGGCATTGAAGCATGTCGGA	532	371	394	438	204	338	146	226	177	222
ACOX2_GACCATCTTCTAACCAACCC	719	557	227	210	203	182	118	160	152	77
ACOX2_GCATAACTGATGGCCAGCTG	971	1187	1691	949	751	940	1445	1184	403	416
ACOX2_GTGTATCACAAACTCCTGGG	672	380	929	497	259	354	643	567	173	226
ACOX2_TGCTGTACCGAGTTTGACGT	689	498	384	434	276	315	300	220	227	64
ACOX3_AAGCCACGGCAGTAATACCA	578	531	461	468	306	357	533	524	162	67
ACOX3_CCGCACGCCTCACCTTAAAG	692	718	632	323	278	351	562	172	198	196
ACOX3_GATCCCAACTGCACATACGA	597	303	75	74	99	130	134	56	71	124
ACOX3_GCGTCAGTTTGGACCCACAG	502	503	631	567	514	706	614	613	284	121
ACOXL_AAGCCACAGCTAATCTCGAA	343	148	210	225	206	179	190	264	159	29
ACOXL_ACAGGAACGATGAAACAGTG	350	166	267	322	112	114	301	196	155	95
ACOXL_ATGTTTGCAATGACCGAGAG	299	202	489	385	239	259	169	273	99	119
ACOXL_TGACAAGGTTCGGATACCCA	410	312	758	452	465	734	446	398	67	183
ACP1_ACATAGTATATAATCAAATG	114	17	0	18	48	33	31	1	0	3
ACP1_ACCCAGACACACAAACAGCA	407	78	3	82	74	45	26	0	49	37
ACP1_GGAACCCCCCTGACTACCGA	1396	1095	910	869	719	910	593	666	529	512
ACP1_GGGGTTCCCTATCTCATACC	263	307	142	193	193	219	117	182	107	29
ACP2_ACATGGTGGCCAACGAGACA	131	135	85	119	85	65	73	170	52	5
ACP2_ACCAGTGAAGACATATCCCA	287	72	42	29	32	39	9	52	30	73
ACP2_CACCTCTTATCACCGGCAAG	477	324	254	117	227	210	88	64	126	36
ACP2_TTCTGCAGCTGCTCATAACG	671	501	285	301	192	257	344	229	109	61
ACP5_ACCCACGGCTACAAAGCGCA	724	387	273	267	302	208	215	171	179	143
ACP5_CTGGACACAGTGACACTATG	1118	1086	1314	946	746	788	782	622	323	372
ACP5_GCTCGGCTATGGACCACACG	764	1069	678	387	559	471	466	437	316	364
ACP5_GTACCAGGGCACTTTGCGAA	311	312	444	240	183	268	448	154	111	114
ACP6_AAAAAGGTGAAGGACAGGAT	355	450	483	165	257	300	231	236	86	105
ACP6_ACAGTCACCAATCTAGCTGG	416	418	261	281	267	477	355	291	133	228
ACP6_ACCAACCTTCAACCCACAGG	322	236	243	102	235	158	44	94	83	67
ACP6_GCAGGTCGTGTTTCGACACG	551	481	523	415	310	496	396	356	267	238
ACPP_AAAGGCAGGTATAGCAACTG	635	868	513	458	273	185	542	319	226	210
ACPP_ACTCCTTGGCTAGTACACTT	618	668	473	314	357	301	385	296	140	216
ACPP_CTACGACCCTTTATATTGTG	433	461	322	524	498	257	255	284	188	262
ACPP_GCCATGAGGATTCCTTTATG	530	933	1885	1501	858	823	1563	1903	933	386
ACPT_AGGCTGGTAGTGGAAGACCG	531	425	372	471	347	287	405	445	46	82
ACPT_TATCCTTGCAAACTTCTCCC	589	221	150	134	160	176	99	44	83	39
ACPT_TCGCCATGGCGGAATACCTG	972	849	478	229	496	452	375	182	346	364
ACPT_TTGGATATTGGAGCCCACGT	763	990	327	325	452	320	281	179	380	288
ACRBP_AAGAAGCGTTCGTATTCGGT	1111	864	726	463	735	474	130	226	440	312
ACRBP_CAAACCAGGAGGCATAAGGG	1114	1234	1233	1183	773	948	1448	1435	482	352
ACRBP_GACTCTACTTCTCGTACCCG	429	535	278	254	333	516	320	266	143	171
ACRBP_GGTGCTGTGCTATTCGATCG	1233	1457	1432	885	919	1065	845	913	493	452
ACRC_AAACTATTGTGGAGCCACCG	445	456	492	490	202	377	347	277	200	114
ACRC_CAAACCACCAAGTGATCCTG	602	367	322	245	212	269	264	194	153	226
ACRC_GCATCCTTAATGTCCAGTCA	465	258	11	225	284	166	154	167	177	76
ACRC_TTATTGGAAATAAACAGCGA	266	164	12	39	40	64	1	16	52	0
ACRV1_CCTGACTCAAGCTCACTCAA	405	142	134	164	91	103	45	70	56	12
ACRV1_GCTGAAGGTGAGCATACTGT	488	633	240	301	395	439	139	140	183	127
ACRV1_TGGTTCAAGCAAGCACACTG	1135	398	344	126	165	106	163	153	74	38
ACRV1_TTCAGGTGAGCACGCTTCAG	376	459	354	252	201	162	382	392	146	138
ACR_AAGCGCCCACACGAAATGGG	625	839	476	343	265	431	359	335	472	75
ACR_CCCCGACACTTACTCACACG	403	448	128	326	211	128	143	244	78	136
ACR_GAAAGCGCCTATGTGGTCGT	411	527	401	478	457	303	443	243	152	59
ACR_TAATGTGCATGACTGGAGAC	70	46	29	1	0	18	12	10	1	1
ACSBG1_GAAGGTGAATAATGCCCAGT	855	1061	1187	865	660	871	1256	999	351	290
ACSBG1_GGAGCCCACATCACACATGG	903	477	374	182	259	260	126	16	165	217
ACSBG1_TCAAAAGAACTTCTATGGAG	342	256	262	271	205	210	299	286	98	98
ACSBG1_TGTGCATCGGATGTTCTACG	596	246	533	520	391	375	300	330	373	63
ACSBG2_AAATTCAGGGATGGTCATCG	666	1014	679	859	396	687	771	742	301	219
ACSBG2_ACACGAGAGTCTTAGCCATG	685	649	422	416	590	339	590	413	223	194
ACSBG2_GGGACCACAGGCATACCCAA	702	625	722	470	384	431	222	385	210	133
ACSBG2_TCCATGAAATCATCCCACTG	596	594	382	169	210	533	153	132	60	272
ACSF2_ACGTAGCTGAGGCCTCCGAT	1410	1333	1052	529	906	944	651	664	683	540
ACSF2_ATGGCTCGGATCAACTCTGG	496	383	82	225	169	228	229	70	98	27
ACSF2_CGTGGGGGTACCATACAGGA	336	140	444	265	162	409	360	298	121	210
ACSF2_GTCTTCATGGAGGACGACCA	616	562	460	265	346	243	293	225	336	297
ACSF3_CCATGATCATCTACACCAGT	707	330	313	277	360	285	282	244	84	103
ACSF3_GCAGCGCGTTGACCACACCA	1045	1092	913	932	574	612	936	703	274	536
ACSF3_TAACGATGCCTCCTACGTCG	1363	903	871	692	586	823	486	509	280	485
ACSF3_TCTTAAGTTCTGAAACGCCG	768	404	136	327	269	327	67	103	161	98
ACSL1_ATCACGTACATAGTCAACAA	481	259	442	255	161	199	143	139	4	140
ACSL1_CAAGAGCCATCGCTTCAGCG	350	328	707	677	317	197	541	571	166	143
ACSL1_GATGCCAATGAACTGATCTG	423	682	199	231	247	252	164	312	96	104
ACSL1_GTTTCCGAGAGCCTAAACAA	499	618	336	531	273	275	215	202	286	169
ACSL3_ATGATTACTGCAATATCTGA	570	29	1	0	82	82	1	17	50	14
ACSL3_GAAAGTTCGAAGCTTGCTAG	763	891	459	495	1352	730	264	191	663	459
ACSL3_GTGGTGAAGAGTAACCAATG	352	484	34	118	268	356	38	2	166	101
ACSL3_TATCTAAAGTATCACATCCA	819	500	144	96	294	263	1	60	242	94
ACSL4_AAGCCCACTTCAGACAAACC	934	624	383	433	175	192	288	227	288	159
ACSL4_ACCTGGTCAGAGAGTGTAAG	917	1329	982	932	837	944	591	421	743	942
ACSL4_GCATCATCACTCCCTTAGGT	930	306	193	103	335	164	155	138	223	131
ACSL4_GTGTGTCTGAGGAGATAGCG	1045	1314	717	669	869	784	615	355	260	216
ACSL5_CAGAGTTGGATTCTTCCAAG	576	1009	930	879	549	416	1100	897	283	312
ACSL5_CTTATCCCTATATGATGCTG	360	546	828	556	312	216	963	1075	85	173
ACSL5_CTTGTTGACAATATGTACGA	997	376	345	292	344	421	206	252	188	139
ACSL5_TCTGATAGAGCAGAGTACCT	714	496	442	450	419	354	298	292	254	152
ACSL6_CTGAGATGCTAAGCCCACGG	1040	800	536	588	611	503	655	649	436	153
ACSL6_GATGCTCACCCATGGGAACG	1053	1287	1303	838	683	970	915	1154	484	530
ACSL6_GTCTCCACAGTGGATCATTG	1417	1772	1530	1442	1031	1064	1137	1152	654	572
ACSL6_TCTGTCGTCTATTGCCACGG	977	866	333	454	515	399	325	273	378	323
ACSM1_CAAGGTCTTTGACTTAACAC	233	69	68	3	53	69	22	5	44	7
ACSM1_CCCCCCAAAAGTGGTTAATG	110	115	193	131	117	223	102	75	131	76
ACSM1_CGCTGTCCATGGTTCTACCA	322	251	281	367	140	117	317	315	135	80
ACSM1_GCACTGCTATACTGGCGGGG	349	535	222	241	271	289	262	138	115	131
ACSM2A_ACAGGCTCCCGAGAGGACGT	416	371	173	391	149	274	166	304	220	140
ACSM2A_GTGCATGCTCCTAATGCCCA	481	459	250	395	301	309	144	152	285	81
ACSM2A_TGACGCAGTTCTGTAGATGG	521	582	624	782	452	461	617	740	295	331
ACSM2A_TGTCTGAGAAAAGCTGTGAT	383	311	478	566	180	163	442	281	154	137
ACSM2B_ATGTGGACCATATCAGACAC	535	250	348	376	320	271	142	409	84	82
ACSM2B_GAAGGGACTCCCCTCCAGCG	482	564	828	661	549	811	685	739	573	532
ACSM2B_TGTCTGAGAAAAGCTGCGAT	206	127	175	267	210	122	198	193	136	97
ACSM2B_TTACCTTTAGAATAACCAGT	272	63	43	215	28	16	168	140	91	16
ACSM3_ATTTCTGTTGATCCACCAGA	548	631	132	236	140	142	58	52	128	20
ACSM3_GAAGCCTGTTCCCTACAAAG	421	527	68	88	198	212	143	90	155	122
ACSM3_TGAAACAGGACTTCAAACTG	479	239	206	299	244	194	77	72	100	102
ACSM3_TGCAACAGCGTCTACTGCTG	855	507	652	699	429	358	700	712	229	266
ACSM4_AGAGGGTGAACCCAATGCCG	562	304	501	467	442	371	170	157	155	238
ACSM4_CACGAGCATCCGGTACACAG	194	99	107	72	36	57	99	13	59	5
ACSM4_CATTCGATGCACAAAAACAC	332	159	157	2	60	110	30	46	74	44
ACSM4_TACAATGGACTCCACCGCTG	617	1189	1300	689	481	562	1094	1329	571	281
ACSM5_ATAACTTTGGCATCAACTCG	428	416	656	452	434	602	686	520	192	516
ACSM5_CTTTACCAGCGGAACCACCG	278	298	181	242	116	168	140	230	123	56
ACSM5_GTGGAAACACCAGACTGGTG	460	368	239	134	226	383	302	180	183	102
ACSM5_TGGTCAGTGTGGCTTGCATG	555	633	269	366	420	427	360	488	104	167
ACSM6_CAGGGATAAAGATCCACCAA	205	310	80	99	119	257	47	26	83	135
ACSM6_CCTGCCTAGGACGGACTCAG	582	440	82	108	359	321	74	101	222	235
ACSM6_TGTCAGATAAGAGCTATGAT	353	321	503	258	242	331	361	567	265	118
ACSM6_TTTGCAGATAGAGTGGTGAT	518	1053	614	571	460	568	733	798	332	398
ACSS1_ACCAGCATTGGGATAAACTG	172	173	318	219	99	232	83	149	17	1
ACSS1_CAGACAACAAGGTCCACATG	338	639	274	219	251	88	308	226	104	275
ACSS1_GATCAAAGCAACGCTCTCGG	894	612	587	529	484	595	353	654	316	425
ACSS1_GCTGAAATACGGTGATGCCT	392	330	286	323	341	365	356	300	81	183
ACSS2_CAGGAAGGGGAGTCAACATG	232	301	304	141	187	213	113	136	111	73
ACSS2_CAGTGGCCCATAGGTGACGT	1661	1347	535	922	610	697	835	658	557	501
ACSS2_GCATTGTGGTCAAGCACCTG	323	380	129	167	198	216	171	116	72	129
ACSS2_GGAACCAAGGGATTGACTTG	1303	1501	804	914	701	895	670	755	422	459
ACSS3_ACATGGTATACATCGCCTGT	653	684	686	289	343	261	214	424	280	187
ACSS3_CCGGGACCACTAAAGCCCTG	400	306	288	314	260	250	207	126	103	14
ACSS3_CTTGTACCAGCTGATCTGCT	584	598	308	355	376	251	448	284	187	155
ACSS3_GGTGTGATTAGGCCCACTGG	292	352	17	145	86	126	102	2	1	5
ACTA1_CTTCTACAACGAGCTTCGCG	363	104	145	68	63	41	34	20	120	44
ACTA1_GGGTCAGAAAGATTCCTACG	180	303	46	178	98	48	33	49	42	141
ACTA1_GGTGAAAGCCGGCTTCGCCG	212	335	339	264	102	283	185	333	47	381
ACTA1_TCAGGTAGTCGGTGAGATCG	738	664	495	488	379	509	478	526	285	226
ACTA2_CATGTATGTGGCTATCCAGG	465	413	371	351	405	268	115	342	216	527
ACTA2_GAAGCTCATTGTAGAAAGAG	322	259	242	51	180	117	57	125	121	127
ACTA2_GACGTCCCAGACATCAGGTG	477	409	336	219	194	309	394	249	135	165
ACTA2_GGCCTCACCAGTAGTAACGA	441	500	247	104	183	228	134	89	113	148
ACTBL2_GAGGACGCCCTATCATGGAG	285	422	317	244	246	151	148	182	179	174
ACTBL2_GGAGCTATGAACTTCCTGAT	360	453	706	686	446	495	829	970	322	484
ACTBL2_GGAGCTCATTGTAGAATGTG	324	350	188	53	196	103	68	101	102	20
ACTBL2_TGTCCCTCTATGCCTCAGGA	459	635	326	259	496	458	273	286	257	132
ACTB_AAGAGCTACGAGCTGCCTGA	923	620	260	500	498	312	328	235	324	353
ACTB_CGTACAGGGATAGCACAGCC	467	755	646	333	440	461	306	492	197	202
ACTB_GGATTCCTATGTGGGCGACG	531	502	151	136	251	214	69	96	208	110
ACTB_TCACCTGGGTCATCTTCTCG	1092	608	278	144	353	472	174	167	287	84
ACTC1_CGATGGACGGGAAGACAGCG	709	972	959	524	461	436	507	368	161	177
ACTC1_CTGGGCTTCATCACCTACGT	316	197	205	55	143	146	42	63	57	126
ACTC1_GGTACGGCCAGAAGCATACA	593	733	483	599	409	325	613	408	233	357
ACTC1_TCTTCATGAGGTAGTCAGTG	713	740	1141	630	558	494	731	765	421	292
ACTG1_AGCTGTAGCCTCGCTCAGTG	1403	1295	1051	536	621	728	834	598	216	248
ACTG1_ATGGAAGGAAACACGGCTCG	321	409	350	245	95	230	408	203	67	51
ACTG1_CAACAGAGAGAAGATGACTC	301	77	142	57	91	31	72	13	101	67
ACTG1_CTTCTACAACGAGCTGCGCG	342	248	245	128	136	126	152	67	207	3
ACTG2_AGAGCTATGAGCTGCCAGAT	747	1242	1102	706	697	612	422	686	455	470
ACTG2_CTGGATACCTGTGGTCACAA	969	973	1292	1487	736	941	1470	1156	554	549
ACTG2_TGAATCCAGGACGATGCCTG	1793	1600	1748	1312	1123	1064	1256	1151	780	539
ACTG2_TGATGATGCCGTGTTCAATG	1271	1148	714	798	695	862	374	570	881	398
ACTL10_AGAAGATGCCCAAAACGCTG	413	191	103	33	229	144	72	130	244	47
ACTL10_AGATGTGTGATGGCCTTGCG	1234	1007	614	759	710	958	389	447	338	470
ACTL10_CACGCCACGCCCATCTACGC	655	216	295	235	199	214	82	35	246	79
ACTL10_GGCCACCTTCCGACTGAACG	826	818	925	946	534	482	813	691	322	388
ACTL6A_ACCACCATACCAATAGCTGT	1104	689	662	505	326	514	525	428	291	311
ACTL6A_ACTGCAATTCCAGTCCACGA	1204	451	8	1	59	103	39	12	85	46
ACTL6A_AGAAGTTGCCTCAGGTTACG	1399	2061	1617	1616	1213	1209	1724	1409	905	683
ACTL6A_TGTTCCGAGGGAGAATATGG	615	460	103	52	79	224	153	89	129	38
ACTL6B_AGTGGAACACACGGGCCAAG	190	44	189	68	66	191	113	27	34	1
ACTL6B_ATGCCAGCTTTGCAAACGGG	1301	1237	672	888	702	785	396	500	447	460
ACTL6B_CACTCACTGTTCATCGTAGG	782	490	396	260	329	795	248	349	280	147
ACTL6B_TTGGCTGCGATCATGTAAGG	551	298	286	177	194	223	243	420	87	71
ACTL7A_ATCGCAAGGAGACATTCGTG	1497	1698	1472	1307	994	1550	1671	1468	1056	1174
ACTL7A_GGGCCATGGCGTGTCCTACG	1563	1773	1494	1495	887	987	1476	1219	498	589
ACTL7A_GTGGCTCTGAACTCGTATGG	1224	1182	1325	1201	796	853	1354	971	719	504
ACTL7A_GTTGTTGAGATCTTGTGGGT	297	318	256	149	249	407	153	175	49	136
ACTL7B_ACTCCTACGGCAAGACCTCG	436	269	105	127	141	253	140	179	82	89
ACTL7B_AGCCGCGCCGACTACGCTGG	458	422	204	400	271	184	116	145	183	111
ACTL7B_CAAGAAGAAGTGCTGCTATG	1031	1088	874	1122	578	825	710	956	442	532
ACTL7B_CGTGGGCAAACGCTGCCCCG	581	645	722	578	712	615	473	558	399	163
ACTL8_CTGGTGGAAAGGCTGCACGC	1420	972	685	324	827	856	355	434	295	316
ACTL8_GAGACTCTTGAGGAGATAGG	999	1176	1188	916	614	562	542	691	542	296
ACTL8_TGTCTCCGTGATGATCACAG	1461	519	524	520	403	546	287	418	182	400
ACTL8_TTTAGCTACCCCATCGAGCG	893	993	850	672	451	509	698	520	327	211
ACTL9_CAGCCCGCTGACACGACCGT	916	784	369	302	472	456	346	486	78	113
ACTL9_CCCAAACCCCAGTCCCAACG	290	380	384	208	97	235	117	206	51	32
ACTL9_GCTGCCACCAAAGACCGGCG	231	366	517	437	393	210	233	266	295	767
ACTL9_TAAGCACCACTATTGCTACG	492	709	1050	799	593	516	1534	619	500	509
ACTN1_CAGGACATCAACAATGCCTG	427	422	329	197	150	156	151	135	234	69
ACTN1_GCAGGGCCTTGATCTCCGAG	1252	1566	1012	700	932	920	1008	916	468	476
ACTN1_GGATCCGCCGCACAATCCCG	289	358	403	187	132	308	298	239	293	65
ACTN1_GGCCCTAACTCAGAAGCGAA	726	534	457	262	227	353	345	230	195	63
ACTN2_AGGACTTCCGGGATTACCGC	499	303	88	300	190	136	185	111	149	49
ACTN2_CCAGGTTAATATTTCCTATG	129	257	213	104	107	121	75	140	11	121
ACTN2_CGAGTCGGCGTCGCTGACAG	336	398	103	239	148	231	210	403	43	178
ACTN2_TGATGGTCCAGATCATACCC	655	336	324	557	259	338	140	384	65	116
ACTN3_CAGTGAGCTGGACTACCACG	889	921	961	1256	608	796	897	896	380	402
ACTN3_CCATGGCTGGAGAACCGTGT	333	118	459	190	181	377	234	243	108	25
ACTN3_GTCCAGGGCCTTGTTAACGT	296	307	64	99	247	235	179	137	101	152
ACTN3_TGCAACTGGAGTTTGCCCGG	272	250	94	148	124	101	62	70	56	3
ACTN4_ACAGATCGAGAACATTGATG	309	222	353	177	155	201	169	141	102	95
ACTN4_ACTCCCACAATGTCAACACC	895	185	402	212	197	316	271	208	231	5
ACTN4_GTTCATCGTCCATACCATCG	503	691	360	238	787	734	477	219	256	175
ACTN4_TGGGCGGCTTGTGCACACGC	705	595	268	292	189	395	237	239	176	77
ACTR10_AAAAAGATATGGGTAACACC	370	62	175	3	192	83	14	14	63	24
ACTR10_AATGAATTTACCCATCACTG	570	238	16	25	142	115	3	19	18	1
ACTR10_AATGGATAGTCAACATTTGG	478	322	127	34	62	178	102	59	129	28
ACTR10_ATTCGATAATCACAACTCGG	466	119	41	64	62	51	9	3	2	24
ACTR1A_AGTCGTAGCCCTCCTTACGC	687	300	176	13	174	147	19	27	135	114
ACTR1A_CGCTACAGGCAGGACCACAG	523	264	94	160	267	227	56	26	129	99
ACTR1A_GAAGGTCTCGAAGAAAACTT	477	163	71	88	137	251	30	2	175	34
ACTR1A_TGACACGAACGTGCTTGGGT	1246	597	227	46	446	568	144	35	99	200
ACTR1B_CTTCATCGGACCAAAAGCAG	240	180	120	20	98	64	68	84	175	30
ACTR1B_GCATCCTGTGCTCCTCACGG	334	227	240	128	135	236	65	83	58	69
ACTR1B_GGTTGTCCGGACAATCAAAG	497	413	303	333	251	94	98	113	63	164
ACTR1B_TCCGTCCTAACAGTGTCGGG	718	635	502	471	342	411	409	421	274	125
ACTR2_ACTGGTGTAGTGGTAGACTC	1373	566	193	187	344	398	164	141	216	319
ACTR2_ATCCTCGCAACAGAAGTAGC	1369	1462	1663	958	688	775	1229	1482	614	625
ACTR2_GGACGTATCATCAAAGTTGG	938	514	88	117	332	367	102	95	137	99
ACTR2_GGATGACATGAAACACCTGT	966	595	66	92	222	206	11	4	120	156
ACTR3B_AGGTAGTTGACCAAGCTCAA	639	679	502	490	401	342	330	607	406	349
ACTR3B_TACTGTTTGATCCACTTCCG	633	624	161	136	319	155	107	98	239	83
ACTR3B_TGGGTGAACGTACGTTAACG	972	831	591	867	580	460	413	545	330	413
ACTR3B_TTTGAATCATTTAACGTACC	308	468	454	391	262	169	370	348	69	61
ACTR3C_CATTTGCCCCGATATAGTCA	283	206	91	65	87	105	66	163	138	43
ACTR3C_GCTTACCACTGGGATAACAT	195	21	0	55	35	111	82	32	54	94
ACTR3C_TACTGTTTGATCCACTTCTG	343	206	81	189	192	116	139	162	113	48
ACTR3C_TGGGTGAACGTACATTAACG	1295	902	845	585	590	457	326	364	369	140
ACTR3_ACCGGTACGGTAATAGACAG	878	1026	159	312	509	652	123	258	175	118
ACTR3_ATTAAGGAGTCAGCAAAAGT	635	581	334	248	251	301	202	113	138	140
ACTR3_CCCAATCTTCAACTATACCA	514	136	60	13	93	156	31	59	63	130
ACTR3_TTAACAAGTATGATACAGAT	746	243	90	69	155	79	22	7	83	55
ACTR5_CGGGACACGCCCAGCCAGCG	597	505	806	522	336	533	410	316	423	392
ACTR5_TCATTTGCCGTGAATACAGT	533	380	169	39	85	275	40	17	16	75
ACTR5_TGAGCACAGCTACATCGCTG	676	537	316	223	260	311	223	67	267	147
ACTR5_TGGGTAAAACATGCGTACAC	513	275	80	74	184	166	18	68	161	99
ACTR6_AGATGTATGCTATGTGTCTC	397	259	417	343	319	381	495	268	238	147
ACTR6_ATAATTCGGAAGGATTATCT	284	345	92	145	104	131	120	76	107	55
ACTR6_CTCCCCTTGCAGGATAAATG	371	498	383	337	180	284	314	190	172	67
ACTR6_GGATGTAAAAGAGTCCAGAA	212	248	75	91	63	39	19	20	73	14
ACTR8_AGCCAACTGTCCTTGTATAG	331	264	151	99	125	220	24	79	21	37
ACTR8_CAACGATTCCAAAAGTTGCG	502	1057	977	1025	557	1163	839	947	3039	507
ACTR8_CACGTGTATTGTAGACGTTG	1091	1032	692	379	657	571	333	342	272	378
ACTR8_CTTCTCCTACTAAATACTCA	467	120	26	66	108	191	113	153	37	71
ACTRT1_ACGGAGCTGATGACATGGCG	357	283	152	217	202	157	99	115	13	126
ACTRT1_GGTAACAGGATGGGATGACA	522	503	1038	970	471	196	604	959	240	273
ACTRT1_TGATTAGACAGGTAGAAACC	240	260	86	179	146	123	43	107	139	79
ACTRT1_TTAATCAGAAGTACTTCGTG	456	519	376	152	250	399	234	206	193	131
ACTRT2_CGCAGTCACCAAGCTCCACG	1182	967	1199	748	602	771	1253	983	439	513
ACTRT2_CGTGCCCGCTTTCTACCTGT	932	1064	1472	771	674	795	1061	838	525	374
ACTRT2_GAATTTCAGGTGCCCCACGA	313	272	335	145	133	254	184	71	58	73
ACTRT2_GATCAGGCCACGCTCGAAAG	783	1203	533	441	499	788	474	452	248	361
ACTRT3_AATGTTCGGGTAGATAAACT	143	63	52	47	39	44	0	22	53	42
ACTRT3_CACTGAGCAACATGATACCA	396	343	386	384	877	844	922	676	401	1738
ACTRT3_GGCGGGCTAGAACTCTGCGT	218	48	63	25	33	127	42	20	0	0
ACTRT3_TGTGGCAATGAACTACGAAG	251	204	62	63	41	46	15	38	1	28
ACVR1B_AAGAGATTATTGGCAAGGGT	85	80	22	15	75	52	24	83	7	0
ACVR1B_ACTTGACTCAGGTCACCTCA	604	586	921	461	456	431	609	724	182	312
ACVR1B_CCGGTTCAGATAATCAAACA	311	251	162	127	98	71	84	161	16	78
ACVR1B_CTACACGTGTGAGACAGATG	155	146	19	21	91	13	9	17	71	100
ACVR1C_ATTGTCCTTTGAACCAACAG	414	307	441	306	225	287	294	263	97	68
ACVR1C_CCAAGATCTTTCATCTCTGG	628	544	573	638	343	357	445	344	261	157
ACVR1C_CTGGCGCTCTCAATTGCTAG	685	572	578	646	338	453	466	360	344	136
ACVR1C_TGTAGGAGCACTGTCGACCC	361	331	69	90	292	107	107	211	123	103
ACVR1_ATTACACTGTTGGAGTGTGT	651	532	336	250	246	366	157	115	343	190
ACVR1_CCATGACTTCTCATCACGGG	567	362	477	461	268	219	529	531	101	323
ACVR1_CTGGTGTAACAGGAACATCA	734	281	285	209	182	231	118	226	80	79
ACVR1_GCCATCGTTGATGCTCAGTG	541	254	132	162	463	308	170	99	66	367
ACVR2A_AGTGGTTTCAAACCTAGTAA	436	411	292	334	287	308	379	168	273	223
ACVR2A_ATTGCAGAAACCATGGCTAG	371	309	261	211	163	211	83	75	25	115
ACVR2A_CCAAAGATCCACATCAACAC	351	73	70	58	27	91	1	8	32	37
ACVR2A_CCAGTTGCTTAACGAATATG	867	879	1177	934	746	718	983	637	310	353
ACVR2B_ACAAGCCGTCTATTGCCCAC	769	702	549	352	316	392	464	689	163	499
ACVR2B_ATGACTTCAACTGCTACGAT	569	271	286	108	149	123	166	45	88	110
ACVR2B_ATGTCCACATGACCGTAGGG	473	650	525	451	297	358	250	326	103	141
ACVR2B_CTGGAGCGCACCAACCAGAG	224	154	157	107	131	77	176	189	87	153
ACVRL1_AGGCACCCCCAGGAACATCG	342	156	137	50	47	131	48	28	3	59
ACVRL1_CCAGGACTGTTCATCCCTCG	675	822	891	725	471	574	854	863	421	450
ACVRL1_CTGCGTGCTCGAGTTGCGGG	581	724	706	582	630	500	565	451	247	291
ACVRL1_TGGACAGTGACTGCACCACA	404	420	316	359	103	207	271	180	280	111
ACY1_AGGCACAAAGGTCATGTGGA	796	389	396	244	263	183	256	133	168	79
ACY1_CCATGCCTCACGCTTCATGG	672	223	524	229	138	344	388	384	105	85
ACY1_GCTGGACAGTGCGGATACGC	817	673	326	334	402	274	316	382	61	115
ACY1_TAGCTTAGTCAGGTTCACGG	566	380	607	686	402	375	577	573	113	263
ACY3_CACCTCATATGGGTCGTCCG	1268	1329	1453	1195	820	1109	748	711	482	818
ACY3_CTTCCTGTACCAGCGGTCTG	559	898	577	558	388	341	647	695	174	275
ACY3_GTGCATGGCAAAGACTTCGT	285	185	118	59	203	222	83	108	905	57
ACY3_TGAGGTCATGGTCCACGTAG	354	273	112	134	177	244	137	119	98	25
ACYP1_ACAGTGCAAGGACAATTGCA	784	711	631	328	476	405	448	342	119	262
ACYP1_TAGGCTGAGGGTAAAAAGCT	275	399	368	337	233	367	315	372	106	75
ACYP1_TGGGTCCAGAACACTGACCG	412	570	234	380	247	231	210	222	87	104
ACYP1_TTCCTGCATATGACGCACCT	434	273	183	325	80	56	166	196	58	61
ACYP2_ACCAGCAAAGGCACCGTGAC	519	428	873	711	327	316	477	351	174	388
ACYP2_CGCCCAGTCACTCAAATCCG	547	567	423	309	452	358	367	197	218	44
ACYP2_GAGGTGTTCGGAAGAGTGCA	673	947	930	830	666	710	1009	770	412	458
ACYP2_TGAAGCTAGGAAAATAGGAG	540	421	352	249	455	484	152	249	163	235
ADAD1_AACTGGTGCAAGGCTGACAC	1430	1244	877	1077	1049	892	887	811	549	599
ADAD1_AGGTGAATACAATTACAGCC	293	313	144	167	138	228	158	148	16	4
ADAD1_CGATAACTACACCCACAGGA	465	499	557	495	161	314	261	444	117	117
ADAD1_TCAAATGCAGATATAGAATG	302	511	500	296	251	327	318	318	103	132
ADAD2_ACAGAGATCCCGCGTGCCAG	476	557	335	256	294	392	218	200	142	127
ADAD2_CACTGCGAATAGCAAGACGG	189	256	240	94	156	121	134	102	52	16
ADAD2_TCACCTACCTACGCTCAGGG	530	396	278	395	320	143	596	326	338	284
ADAD2_TTCAAATATAGAGCCCCTGG	197	230	104	87	57	117	100	53	51	122
ADAL_ACTAATGGATCCATTCAAGT	756	357	260	181	114	160	157	127	137	147
ADAL_CAATCACAGTCATCTGATCG	892	1592	1145	932	713	807	1058	894	623	431
ADAL_GGAGACTGTAAAACTTGCCG	663	495	912	470	441	623	820	596	486	1485
ADAL_TATGTGGAATCTATACTTGA	626	264	403	102	156	256	320	125	154	120
ADAM10_CCCATAAATACGGTCCTCAG	349	401	213	157	153	198	161	145	157	61
ADAM10_GGAAATGGAATGGTAGAACA	322	241	293	142	305	170	109	70	86	130
ADAM10_TTCCATCAATAACAGACCCA	385	143	37	235	98	107	32	29	18	51
ADAM10_TTTCAACCTACGAATGAAGA	295	115	129	218	125	162	148	207	98	149
ADAM11_GCTCATGGTCTACCGACGGG	1073	1237	437	638	654	747	541	338	378	445
ADAM11_GCTCCACGTATTGCGAGGAG	896	979	541	385	276	433	462	450	248	169
ADAM11_GTTCGAGCAGATGCGACAGT	717	436	123	140	409	218	33	121	188	87
ADAM11_TGGGAACTTGACTTACATCG	408	132	95	44	98	136	4	38	74	2
ADAM12_AAGCAATGGTACTTGCCCGG	405	310	84	58	222	71	147	66	37	32
ADAM12_ACTGAACATTCGGATCGTGT	838	280	411	189	204	223	189	157	100	146
ADAM12_GGTGATCCTTATGGCAACTG	533	653	514	133	335	349	157	119	355	366
ADAM12_TGCTGAATATTCGACTACAA	307	268	153	175	96	78	58	53	68	58
ADAM15_AGTGCCACTCGTACATTCAG	631	352	173	230	183	290	238	177	169	150
ADAM15_CTCCAGACAGCTAATACTCG	620	662	749	691	763	583	591	418	375	394
ADAM15_CTGTTGTCAAAATTGCCAGG	641	615	771	548	489	389	506	454	178	355
ADAM15_TGGATTCGCGAAATAATGGG	492	210	558	322	243	352	469	336	121	191
ADAM17_AATCAGAATCAACACAGATG	186	159	64	104	61	57	25	25	1	22
ADAM17_ACAAAATTTCAAGGTCGTGG	333	389	436	236	136	260	253	115	143	84
ADAM17_CATCGCTTCTACAGATACAT	585	522	741	589	344	311	653	822	343	163
ADAM17_TGGTGAAAAGCACTACAACA	244	8	108	11	107	105	3	5	78	2
ADAM18_AAAATCCCATTACCACACAC	386	147	20	43	107	49	87	42	81	66
ADAM18_AGTAAGTATGCTATGTCATG	262	409	716	476	445	327	567	486	284	85
ADAM18_AGTGCCTGCTATTGACAACT	394	517	1011	346	378	456	958	646	1151	925
ADAM18_TATAACAGTCAATTTGAACT	233	81	129	68	95	106	26	50	42	70
ADAM19_ATGCCTCTAATTGTACCCTG	600	622	599	582	325	288	432	580	332	282
ADAM19_CCTCTAAATAATCAGCCACG	202	221	145	158	95	85	128	208	50	43
ADAM19_GTCACGCTCAGCACTTGCCG	430	436	376	359	291	128	292	204	138	50
ADAM19_TGCCCAGAGATGCGAAGTGT	593	760	82	258	206	394	303	133	383	232
ADAM20_AATGTGACTGTGGAACCATA	1211	1330	1309	691	1075	918	514	898	763	630
ADAM20_AGAGATACATTGTCCACATG	1204	2002	1146	1306	906	1152	1022	1245	541	363
ADAM20_GGTGTGTGTGCGAGCTACAG	809	1287	1476	1434	1395	1326	1286	1456	4430	9723
ADAM20_TAAGGGCAACCAAGGACTCA	984	1355	878	874	619	789	609	818	334	351
ADAM21_ATATTCCTGCAACATAGGCT	1236	889	547	319	497	629	242	432	242	248
ADAM21_GAAACACGTTGTTCATATGA	1202	749	912	661	483	668	420	488	412	179
ADAM21_GCATAATCCTCCAAGATTGG	819	1149	994	793	656	803	681	753	492	285
ADAM21_TGGGTTCAATTTCATAAGTG	410	482	491	375	317	388	381	466	184	121
ADAM22_ATAGGTATTGGTATGTACAA	509	457	191	290	290	245	96	160	230	128
ADAM22_CTTAGGTGAATGTAAATGCG	472	953	867	937	471	307	530	1010	281	248
ADAM22_TACTACCAGGGCCATATCCG	522	431	547	704	437	410	966	576	250	184
ADAM22_TGTATTTCATAAACTCACGT	574	211	87	63	90	139	75	64	98	31
ADAM23_ACATATAATCCAGAAAACCT	288	245	46	156	50	75	49	66	56	106
ADAM23_AGGCGTCAAAGACTCCAAGG	223	285	472	328	190	286	238	467	201	216
ADAM23_ATATTACATCAACCAAGACT	507	387	196	185	144	100	85	138	92	40
ADAM23_GGATACTTACAGAATCCACA	290	262	281	113	97	96	122	110	42	44
ADAM28_CATACTACTAGTTTGGTGGC	617	876	1066	592	378	358	613	758	229	130
ADAM28_TAAAAAGCTCAATACTCATG	436	227	290	164	200	211	146	233	150	84
ADAM28_TAGGCAATGGAGCATTAAAG	502	442	320	390	471	277	306	318	154	138
ADAM28_TTAAGCCCCATACATCGGGA	492	607	364	351	362	568	360	414	233	207
ADAM29_ACTGCAAGTTCCTACCATCA	627	577	836	514	343	389	174	415	273	324
ADAM29_AGTCGGAGAACATTACGCCC	502	584	544	289	327	417	332	224	189	73
ADAM29_GTATACCAGATGTTCAAACG	229	132	136	162	136	158	78	42	205	107
ADAM29_TTTGGGCATGAACCATGATG	531	495	422	442	283	395	441	328	211	222
ADAM2_ATGTGTGATGCAAACTATGC	605	472	466	941	481	410	701	802	340	193
ADAM2_CTTTAAATTACAAAGCGTAG	325	268	144	200	159	261	194	123	49	77
ADAM2_GACCTCCCTGAATATTGCAA	681	515	356	376	317	245	255	170	167	200
ADAM2_TTGAAAAAAGGATCTAAGCG	436	773	691	511	372	512	579	402	136	171
ADAM30_AATACTGCCAATGTAGGGGT	379	346	401	349	117	334	163	113	217	207
ADAM30_ATGTGGAAACAAAATTGTGG	202	159	135	178	129	144	165	142	118	85
ADAM30_CCAAAGGACTGCAACTACAT	315	247	170	121	136	156	71	166	89	147
ADAM30_CCCCTTATGAGAATAAGGCG	121	272	196	196	111	134	148	134	41	42
ADAM32_AAATCTCCGAAACCAGTCTG	180	559	326	593	180	348	411	432	119	78
ADAM32_AACACTGCTCCCAAATAACG	544	396	305	407	315	332	220	407	143	205
ADAM32_AAGCCTGAAAGAACAACCAA	326	76	225	135	122	128	203	151	83	44
ADAM32_TACAATCAGGCGTTGAATGT	388	606	632	618	335	557	1102	390	364	275
ADAM33_CACAGGGTGAGCCGTCCAGT	237	205	192	90	152	147	42	74	57	44
ADAM33_CCCCCCACCCGCGTACCCGG	392	273	961	694	402	569	588	716	345	216
ADAM33_CTCCATCCGAAAGATCTCGT	653	467	342	265	257	290	213	352	143	160
ADAM33_GTGGGTTTCTATGTATCCTG	203	417	358	504	200	550	953	702	46	237
ADAM7_AAAGATCCTTAAAACACGGA	594	436	197	227	281	121	135	156	183	49
ADAM7_ACAGAATGGCACATCAACTG	975	723	671	781	499	454	811	734	428	317
ADAM7_CATTTGCAAATACCTGAGCA	561	330	843	639	436	525	709	667	327	339
ADAM7_CCATAAGATACCATGATCTG	536	872	440	492	325	573	238	237	470	184
ADAM8_AGTCCGGGTACCCCTCTACG	1140	1050	1273	897	896	927	1237	974	692	496
ADAM8_CAAACAGGTTCCCACACACG	308	256	174	169	217	359	92	243	51	94
ADAM8_CCACATACAGCTCCACGTAG	387	197	195	149	66	71	31	57	66	13
ADAM8_CCAGCTTAGACTCACCAAGT	258	205	99	83	143	108	242	15	34	80
ADAM9_AAAAGTTTCTTATCACACGT	466	361	229	213	230	191	228	243	20	85
ADAM9_GAATTGGACCCTTGCTGCGA	203	310	313	182	197	79	255	189	121	82
ADAM9_GCTGTTCATTGTCGTAGACA	245	273	172	90	87	258	189	112	99	193
ADAM9_TGTGGTTTATACTTACAACA	220	0	1	42	31	44	54	18	18	0
ADAMDEC1_AATGTCTTACCACATTGAGT	448	330	294	202	176	306	307	238	136	237
ADAMDEC1_CGTCTTTACATCTAACCAGG	281	236	119	11	137	101	33	80	10	28
ADAMDEC1_GATGGCACAGTTCTAACCTG	815	871	674	619	365	622	846	922	375	318
ADAMDEC1_TGATGTGTGAAGTATCCTCT	430	458	293	190	155	124	150	147	178	170
ADAMTS10_ATCGCGTCAGTGTAAATACG	931	1182	511	527	431	588	503	340	765	453
ADAMTS10_GGCATGAACCATGACGGCGT	504	326	137	201	232	140	33	119	85	38
ADAMTS10_TACAAGTGGAAAACGTACCG	477	979	856	681	426	346	843	504	242	141
ADAMTS10_TGCCATTCCAGAGAACGGTG	223	61	41	75	17	43	120	86	26	67
ADAMTS12_AACATCATAGATCACTCCGG	406	173	135	152	78	175	146	150	155	63
ADAMTS12_AATGCCACCGAGGATCGCTG	385	351	293	126	265	162	160	117	41	4
ADAMTS12_GTACTACAGAATTTCTCACG	326	454	264	385	183	127	173	137	132	196
ADAMTS12_TTGGTGCCTCTGAGCGACAG	441	488	384	195	126	231	291	197	84	207
ADAMTS13_AGCACCACACTCACTAGGGA	1056	695	253	269	324	386	380	164	113	190
ADAMTS13_CATGGGCGCTGGTCTAGCTG	280	326	334	306	384	311	508	378	133	83
ADAMTS13_GGCAACTCCAGGTCAAACCT	500	569	303	284	333	414	309	168	87	197
ADAMTS13_TGGTCGTGTCGAGTACAGAG	969	1151	541	339	560	626	351	328	159	155
ADAMTS14_CAGACCTGGTACTCGAACAT	376	376	232	169	319	270	233	207	120	77
ADAMTS14_CAGGAGTGTGTGTACACTGG	505	662	551	492	324	364	573	433	384	197
ADAMTS14_GGTCTCATGAGCTATCACGA	406	194	286	126	134	78	78	107	115	84
ADAMTS14_TGACCTTTGAAGCACCACTG	526	652	379	319	312	305	346	187	166	45
ADAMTS15_AGCGTTTCGTGTCTATCCCG	941	700	504	519	261	482	263	310	236	227
ADAMTS15_CAACCCCATCAACATCGTTG	1545	1095	894	835	689	803	569	593	434	304
ADAMTS15_CATGGGGCATGTTGAACACG	1449	1929	2280	2283	1142	1279	1903	1654	1288	701
ADAMTS15_GCGACGCTGCTTCTATTCTG	923	911	484	436	316	350	324	263	288	297
ADAMTS16_AAGAAGACCAGTCCGACCAG	507	881	716	645	501	536	691	667	402	210
ADAMTS16_AGATGGGACTCCATGCTCGG	478	388	563	558	306	418	327	467	272	130
ADAMTS16_GGGACACGTAATCGCCCCTG	342	314	449	107	217	113	35	118	146	131
ADAMTS16_GTTGAGTATCGTGAGCACGT	582	298	59	80	59	186	120	90	88	130
ADAMTS17_AGAAAAGAAGAAGCCGACGT	462	376	91	261	221	252	248	51	78	95
ADAMTS17_AGTAGAAGCACAGCTCGGCG	978	648	1369	1007	537	1033	849	954	790	366
ADAMTS17_GAGACTGATCTCTGCGTGCA	1272	1547	1597	1510	909	1132	1471	976	570	558
ADAMTS17_GCATGTGCAGCCGAACATGT	1059	1126	1734	1228	568	984	1488	1306	987	986
ADAMTS18_AGGCCAGTGCGTAAAGTTTG	734	1472	1516	1140	1143	857	1655	1635	1086	1770
ADAMTS18_CCGAAGTTGTACCATCAATG	593	508	419	394	389	467	402	376	134	244
ADAMTS18_GTGACTGCTCAAAATCGCCG	734	346	506	346	410	274	287	315	210	240
ADAMTS18_TATTGGAAGTGACATAAACG	585	472	479	650	432	561	604	389	443	7079
ADAMTS19_ATGCAGCTATACTTATAACA	304	98	145	19	73	116	33	35	26	4
ADAMTS19_CCACTGAAGTATATGCTTTG	326	742	642	555	465	521	289	235	190	162
ADAMTS19_GACCATCAGCACACGATGGG	2163	2882	2558	2223	1651	1942	2695	2256	839	1002
ADAMTS19_TCTGCCTATATACACGGTGT	966	956	813	988	578	894	429	709	212	273
ADAMTS1_CTATGTGGAAACCATGCTTG	298	197	97	129	186	31	14	23	139	38
ADAMTS1_GAAAGCGGAGACCGAAGACG	371	555	252	272	221	161	261	203	44	162
ADAMTS1_GAGGAGTCCAGTACACGATG	537	436	200	240	315	322	175	114	123	87
ADAMTS1_GTAATCATGTAGGCACTGCA	1287	657	569	740	432	612	303	427	355	298
ADAMTS20_AGTGAATGTTCATCCCAATG	370	439	378	352	440	198	430	318	565	1299
ADAMTS20_GCCTCCGCATAAGCTGACGA	427	142	107	151	200	106	150	82	6	80
ADAMTS20_GGCTGCTAGTGAATGGAGCG	459	518	722	490	433	523	333	359	138	227
ADAMTS20_GTGGCATTCCCTCTAATGTG	214	151	533	205	110	282	379	419	146	84
ADAMTS2_AGCACGCCAACAGCTCGAGG	1749	2045	2731	2263	1221	1287	2358	2291	748	509
ADAMTS2_CCTGACATCCTCAAACGGGA	1232	371	336	393	466	321	265	299	217	633
ADAMTS2_CGTGATCGTGGTATTCATCG	1163	850	689	369	469	476	473	383	247	530
ADAMTS2_GAGCTTCCCCGGAGGCAACG	1011	1416	1411	1218	791	990	1260	693	600	514
ADAMTS3_CCACATTTATATGCACTCCG	407	19	91	121	168	43	34	116	73	1
ADAMTS3_TGGCTATAAAATGTGCACCG	221	80	39	120	60	166	1	63	14	46
ADAMTS3_TGTGGTGATGAGACTGCTAT	568	740	412	237	432	361	190	216	412	180
ADAMTS3_TGTGTTAATCCAAGAAGACG	298	353	463	342	243	318	156	174	151	74
ADAMTS4_AGCGCTTTAGCCCCGCACCG	943	633	1060	572	823	672	907	474	465	277
ADAMTS4_AGGGGCCATGACATGGCGAG	532	497	559	516	321	459	419	414	68	192
ADAMTS4_CATACCCAGCGTGTCGCAAG	744	481	233	214	322	314	103	181	112	147
ADAMTS4_CCAGACCAAACACTCGCCCT	471	302	450	349	411	214	224	213	73	224
ADAMTS5_AACATCGACCAACTCTACTC	953	308	388	292	155	126	190	141	231	194
ADAMTS5_CTGCACGTCTACACCCGCGA	1266	631	423	303	219	581	180	282	265	179
ADAMTS5_CTGCTTCTATCGGGGCACAG	303	113	121	77	146	48	30	61	20	61
ADAMTS5_TGTGCTGTGATTGAAGACGA	856	832	476	552	379	467	345	295	507	295
ADAMTS6_AGCATCATACACCTGACCTG	532	422	129	205	120	158	132	99	222	125
ADAMTS6_TAATAAGAACTGCATTATCG	534	211	110	196	101	123	67	147	109	52
ADAMTS6_TGGCCCCAGAGCATAGATGG	761	1212	900	663	485	517	840	690	402	360
ADAMTS6_TTAGACAACTGTCATTACAC	830	649	530	375	378	455	447	332	94	195
ADAMTS7_GAAAAGCATCAACATGAAGG	744	288	295	350	341	293	264	208	234	190
ADAMTS7_GCCCGTAGGACAGATCCTCG	356	319	201	125	191	279	160	69	178	136
ADAMTS7_GGACGCCAGGTGGCACCGAG	206	119	68	210	136	116	122	95	31	45
ADAMTS7_TTCTACGAGCTACAATACCG	631	254	648	581	152	560	361	488	158	108
ADAMTS8_AAACCGCTTGGTCCTACTCG	551	617	403	405	455	389	373	334	163	81
ADAMTS8_AAGGACCCCGAGCCTCAGAA	587	828	617	699	395	575	488	486	156	140
ADAMTS8_CCACCCAGAGCACTACGACA	1339	1036	1189	892	1368	1274	861	879	2561	2418
ADAMTS8_TTCAAGATCGAGCGCCTCGG	1017	743	630	869	441	832	721	675	490	403
ADAMTS9_ACTGAAAGGTAACTCACACA	614	415	104	119	151	71	179	94	69	50
ADAMTS9_AGCCCGGAGAGATAAATGTG	218	304	161	426	201	177	233	374	69	38
ADAMTS9_CTGCGCCTATAAATGATGTG	494	669	478	372	302	361	408	195	184	88
ADAMTS9_TGAAAGAATAGCGTACATCG	718	478	758	379	312	343	511	597	255	195
ADAMTSL1_AGGTGCTAGTTCAACAACCA	366	334	146	194	296	469	328	182	195	78
ADAMTSL1_CAGCTCGACGCACGTCACGG	443	235	39	150	427	369	230	147	156	180
ADAMTSL1_TGGAATTGACAACCGTTGAG	307	95	307	144	195	118	111	141	163	37
ADAMTSL1_TGTATGACTGGGAGTATGAG	417	523	474	551	317	314	802	597	134	146
ADAMTSL2_CGTACGCAGACATGACCCCT	673	762	740	693	525	514	857	776	351	256
ADAMTSL2_CGTCCGCCCGTTGTACACGT	433	298	183	125	106	141	38	161	11	89
ADAMTSL2_GACCGGAATCGAGTACATCG	356	143	50	6	62	98	15	39	8	25
ADAMTSL2_TGACGGGCAACTATCGCAAG	315	14	125	70	116	139	83	139	83	94
ADAMTSL3_ATTTCTGGAATCGTCGCACG	243	197	216	109	205	281	208	194	75	128
ADAMTSL3_CCAAACTATTGGCTTCGCTG	187	203	161	171	123	97	110	150	130	81
ADAMTSL3_CCTTGCACAGCAACATGCGT	526	244	200	252	89	163	395	255	19	115
ADAMTSL3_GCAGCAGGATCATTATATCG	190	165	68	104	55	56	36	73	31	24
ADAMTSL4_AGGACGGTTATATCGAAAGA	669	358	426	301	389	425	209	182	276	232
ADAMTSL4_CCTTCTCCTAAGGAGTGCGT	1306	629	536	411	611	687	419	347	231	244
ADAMTSL4_GCTGCGTACTGGAAACGAGT	1215	235	293	155	229	152	163	218	100	18
ADAMTSL4_GGGGGCCCCCTCGGTCAGTG	1027	1433	1282	1065	543	846	1021	928	586	610
ADAMTSL5_AGAACTCAAACTCGATGCCA	444	265	307	198	167	72	223	341	166	166
ADAMTSL5_GCACACTGTAGGTCTCGGAA	750	924	594	648	556	377	718	516	275	273
ADAMTSL5_GGATGTGTCTGGCGCCCTCG	505	534	493	373	347	321	368	254	203	193
ADAMTSL5_TGGTCTACACCCGAGACACA	485	352	256	223	291	233	282	454	237	189
ADAP1_CAGGTGCTCGATCTTCATCA	356	159	181	50	159	183	98	68	92	76
ADAP1_GCTTCCAGAGAAAACCCTCA	128	180	54	58	43	169	13	40	50	7
ADAP1_GTGGGCCGGTAGTAGAAGGA	1085	801	725	693	487	611	541	738	543	601
ADAP1_GTTTGTGCTGACAGAACGAG	336	604	347	287	167	352	624	533	189	507
ADAP2_CCTCCTGAAGTACTTCACAA	374	152	35	94	60	159	82	82	28	54
ADAP2_CTGGGACGACAGTATTGTGG	733	622	361	242	398	553	479	192	328	118
ADAP2_TGATGTCAGGGAAGTTACGG	463	134	78	199	121	162	75	63	34	89
ADAP2_TGTTTGTGTATCATGAAAGT	178	231	3	48	26	163	17	5	39	46
ADARB1_GGTGAATACATGAGTGATCG	372	626	521	472	243	240	567	595	102	205
ADARB1_TCAGGTCACCAAACTTACCC	843	497	464	587	423	368	638	232	217	169
ADARB1_TTCAGAAATCAGAGCGAGGG	753	903	766	636	604	681	726	428	490	264
ADARB1_TTGGAGCCCACGTAAAAGGG	954	882	1693	1369	955	820	1874	1723	287	405
ADARB2_CAGAGCGATCGATATTCGTG	600	536	961	437	289	455	658	408	273	250
ADARB2_GGCGTTGGGGAACTGCACGA	873	245	286	326	240	214	268	402	189	327
ADARB2_GTGGACGGCAGGACGTTCGA	914	959	1426	811	801	692	724	1079	462	482
ADARB2_TCCTGGCATCACAAACACGG	856	375	231	64	240	418	150	177	246	112
ADAR_AGGCAATCAACACCTCTCTG	473	244	170	25	44	188	28	172	47	106
ADAR_CGTTCTCCCCAATCAAGACA	475	185	8	9	52	66	2	7	104	44
ADAR_GTGCATACACTCAAGCAGTG	622	953	386	202	318	211	239	270	230	460
ADAR_TTCTTGTAGGGTGAACACCG	599	153	162	100	119	194	153	114	16	83
ADAT1_ATGCTGAGGTCATAGCCAGA	892	859	858	817	425	337	476	622	320	394
ADAT1_CTATCACTTTGGCACTACCA	533	190	303	232	138	205	123	90	94	241
ADAT1_GCATCCGAGGACGTTCCATC	354	250	152	93	167	149	304	119	21	54
ADAT1_GTGGACATTATTGGCAGCGG	250	282	370	132	184	152	105	160	68	105
ADAT2_CACTTTGACGACACCAATCG	1081	1043	971	511	583	819	783	598	364	401
ADAT2_GCAGCTGCACACATAATGCA	871	1040	272	284	338	635	26	101	283	169
ADAT2_GGAGACCGAAAAGTGGATGG	764	1072	759	423	421	611	713	501	352	224
ADAT2_TGACAGCCATATACAACCAG	532	660	360	290	305	358	74	128	92	1538
ADAT3_CCCACACCGCCCGCTCCATG	901	993	496	332	574	552	212	261	206	163
ADAT3_CGAGGCCGGGTCCACTACCA	674	736	481	441	419	833	186	93	154	211
ADAT3_GCTTCTCGGACAGGACAGGG	276	74	3	114	70	272	3	1	60	67
ADAT3_TTGTCCTCGTGGAAGGACGT	1269	1554	1163	1191	968	680	894	490	699	472
ADA_CACAGACTGGTCCCCCAAGG	396	619	685	898	370	580	442	552	394	147
ADA_TCACCGTACTGTCCACGCCG	1809	1060	479	447	376	588	511	386	359	161
ADA_TCCCAGCTAACACAGCAGAG	253	214	160	214	85	180	249	91	114	98
ADA_TGGACATACTCAAGACAGAG	425	126	217	159	180	152	144	139	71	22
ADCK1_GAGTGTCCCTTATGGCTCAG	402	199	172	241	319	232	96	179	61	163
ADCK1_GCTTCGATGACACCCCTCTG	335	362	171	107	174	234	54	112	50	41
ADCK1_GGTGCGGAAGCACCCCGGCA	193	282	376	295	148	208	171	247	105	74
ADCK1_TTTCAGATCTCACGCCACCT	657	548	313	422	258	245	253	160	297	159
ADCK2_CCTCCGAAAACAGATCGCGC	1010	424	160	153	376	499	256	234	180	295
ADCK2_CCTGGTTGGATCAAATGCAG	806	678	922	634	267	160	722	652	240	407
ADCK2_GGCGTATGCTTTGTACACCT	1070	568	463	538	261	365	273	224	224	139
ADCK2_TTCGCCGACTCAGAACGTCA	1500	522	331	441	314	309	310	358	199	268
ADCK3_CCGAATGAAGGGCGGCCGCG	348	518	438	304	340	335	169	255	199	193
ADCK3_CCTGGCTAAGATCTTCGAGC	1056	633	127	134	213	139	138	10	196	181
ADCK3_CCTGGGTCATGCCCACAGCG	317	348	162	199	144	291	80	198	24	109
ADCK3_TGTCCGAGGCCAATGCAGAG	498	808	386	333	508	341	280	305	192	257
ADCK4_GCACCTTGCGTTCTCGAGAG	204	153	354	174	137	179	232	174	55	119
ADCK4_GGAGTGTGACTACCGTCGTG	1157	1565	1531	1146	983	1259	1092	860	581	434
ADCK4_TAAGGTCTGCACAATCCGCT	506	309	275	190	208	148	137	72	63	136
ADCK4_TTAAGGAGCTGTGCACGACA	958	385	370	218	433	483	168	250	328	256
ADCK5_CACCCCTCGAAGGACAACAT	1166	843	787	582	582	437	622	546	294	131
ADCK5_CGCGGGGCACCACGACGTAG	1216	1544	1267	1180	946	1014	1292	1282	818	723
ADCK5_GTGCCTCTGCCATGACATAG	1514	1655	1438	1062	1222	1176	1041	1063	643	629
ADCK5_TGCCAGGATGTGGGTCCGAG	544	1100	909	926	574	578	659	538	316	204
ADCY10_AATGCTTACCTATCTTGACT	997	759	317	205	278	230	84	60	132	142
ADCY10_AGAAAACAGCCTACGAGCTG	1102	1714	1259	1263	1022	1287	1337	998	525	429
ADCY10_GCACAGGGAATGTTAACGAA	722	604	273	326	260	516	160	106	192	319
ADCY10_TCACAAACACAATCGTCACT	972	759	634	346	356	356	475	435	387	410
ADCY1_AACCGGGTTACGGACATGAG	606	904	1259	643	1001	1167	1472	1217	6754	11165
ADCY1_CATGTTCAGATCCACCTCGG	505	196	197	146	162	186	352	330	147	113
ADCY1_CCCAGACGAAAGGACCACCA	1076	1148	1446	972	968	879	922	1091	358	346
ADCY1_CGGGGTGGTGTAGACAACGT	467	432	802	582	189	318	418	474	280	232
ADCY2_ACTCCAAGTACCGGGTCATG	382	610	348	174	322	303	216	154	228	151
ADCY2_CAGGCAGACGCTAAGCACGA	1139	380	381	274	439	227	272	305	79	678
ADCY2_CCTGTAATTGCATCAAGTCG	612	955	645	738	643	476	699	657	343	283
ADCY2_TGAAGCGGCATACAAACGTG	390	315	343	128	245	184	125	264	269	66
ADCY3_AGCTGTCTCCAGTACTACAC	1020	776	808	891	2442	1473	706	919	11650	747
ADCY3_CCACGGAGATGATCACGATG	542	344	138	115	130	243	99	87	98	64
ADCY3_GTCGATGAGTATCTCGACCA	530	448	258	325	280	354	70	130	6	197
ADCY3_TCTCTTCTAGGTAATCACAG	6	0	0	0	0	0	0	0	0	0
ADCY4_GGAGAGGTTGGAAATCATGG	143	153	79	24	46	35	1	7	34	14
ADCY4_GTGGCCCAAGATACAGCCCG	197	292	72	104	111	62	132	120	105	67
ADCY4_TGGAGGCAGGCGGTGTACCA	334	560	524	392	248	394	647	701	267	73
ADCY4_TTCATCATCTAGTCCCCGGG	526	274	378	420	331	259	277	214	277	253
ADCY5_AGCCGCTCCAGTTTGTCCGA	296	298	276	245	227	214	217	267	93	70
ADCY5_AGCTACACTCACCTTTACGC	839	334	359	247	152	254	71	77	21	88
ADCY5_CACAGCGGGCGAGTACACTG	515	360	420	446	283	188	130	181	235	145
ADCY5_GACGACGATCCTCCGCTGAG	719	924	634	551	313	446	583	363	148	288
ADCY6_AACACTGCAGTACCTGAACG	1113	1540	1413	536	845	1086	807	899	512	283
ADCY6_ATAGATCCCAAGCATCAGGG	468	244	157	276	117	180	45	106	171	111
ADCY6_GATGACGCCTTCATCCGGAG	306	135	58	20	76	62	0	0	0	43
ADCY6_TTGGCCTGGCAACTTAACCG	378	338	368	185	164	283	146	93	167	198
ADCY7_AGAGGCACCAGAATGTCAGG	551	792	584	470	668	674	296	462	266	95
ADCY7_CCGTAGCCGGGTGCACATCA	175	351	237	135	169	132	143	130	65	104
ADCY7_GCGTGGGTAGGCAGCGACAC	228	97	84	48	93	33	122	51	113	64
ADCY7_TGTACGTCGAGTGTCTCCTG	804	475	530	452	476	530	548	460	263	263
ADCY8_ATTTCCAGGACAACAAACCG	388	535	191	176	253	247	154	159	142	175
ADCY8_CAAAACACGATGTTGACATG	691	813	607	483	453	335	542	537	246	478
ADCY8_CGATATTTAAGATGGCACCC	350	155	249	316	227	269	306	353	115	106
ADCY8_GCTGCAGGTCATCCTCCAAG	456	199	124	150	149	58	108	197	126	66
ADCY9_GATATCGGGTCAGAGAGCCA	673	756	848	338	501	500	427	554	313	356
ADCY9_GCTACCACGTCACTGCATCG	1031	496	596	389	706	521	524	427	291	325
ADCY9_GGGAGACTGTTACTACTGCG	915	1251	911	634	535	725	717	877	373	327
ADCY9_TGTACGCCCGGCATTACGCG	786	593	595	400	592	583	315	298	348	118
ADCYAP1R1_CGAATCTTCAACCCAGACCA	301	227	402	384	278	254	294	325	197	152
ADCYAP1R1_GGTGAGCCGGAACTGCACGG	518	331	296	300	382	218	166	175	172	256
ADCYAP1R1_TGAATATGAATCTGAGACTG	293	229	213	245	169	184	140	270	190	186
ADCYAP1R1_TGTGGGACAACATCACGTGT	842	369	221	294	290	761	203	296	269	362
ADCYAP1_AGAGGAAGAGGCGTACGGCG	249	429	732	441	204	466	696	1039	175	316
ADCYAP1_GAAGCACCTGCAGTCGCTCG	504	349	201	203	222	256	191	286	217	201
ADCYAP1_GCTGCCAGACTTCGATGGCT	237	187	109	54	100	225	36	65	17	90
ADCYAP1_GGCCTCGTTAAGGATCCCGT	331	174	198	203	93	130	80	50	123	47
ADD1_ATTATCGAGCATCCGCATGA	1537	495	319	399	408	649	73	249	286	213
ADD1_CCTCTTGCCAATCTCCCCGG	902	765	644	439	499	454	321	501	462	283
ADD1_GACTAGCAGATCTCTTTGGG	406	645	612	427	391	447	443	432	161	219
ADD1_GTAATGCCAATAGGCCTGTG	1176	1149	891	805	804	765	739	698	525	462
ADD2_ACTCGGCCATCTATGCAGCG	769	1372	1902	1233	865	1110	1558	1325	490	669
ADD2_GCTGAGTGACACCTATGTCA	688	359	191	111	328	199	251	220	104	48
ADD2_GGAGAAGCACCGGCCCCATG	870	720	896	794	606	792	865	619	484	649
ADD2_GGTGCTAAGAAACCATGGAG	351	332	118	43	155	110	33	93	43	32
ADD3_AAGGATCCCACATTTCATGG	535	480	411	253	291	345	292	417	145	86
ADD3_ACCCAGAATACATTAGGGAG	240	316	314	401	175	176	183	95	43	161
ADD3_CTAGGCTTCTCTCGAATGAG	383	530	478	689	385	370	349	328	60	282
ADD3_GTCTACAAGTCTGTACAGGC	568	285	423	114	274	340	294	164	373	188
ADGB_AAAAGCGACAAAGTTCCAAA	255	275	250	103	114	74	168	113	142	79
ADGB_CAACTTATGAATTTGAACTG	229	363	271	296	171	124	370	152	74	146
ADGB_GAAGGTAAATCAGATCCTGG	316	407	315	214	133	270	271	298	71	177
ADGB_TCAGTGAAATCTATGCAGTG	268	156	243	317	128	160	278	326	58	120
ADGRA1_ACCTTCACTGTGTTCGCCGG	428	738	579	318	328	405	503	468	373	410
ADGRA1_CCCCGCACTTGACGCCAACG	395	341	386	217	164	177	150	218	166	101
ADGRA1_GGTGCCCAGGAAGTACACAC	307	280	85	104	49	89	92	71	70	60
ADGRA1_TGCACTCAGTACCTGAGCAG	884	713	335	409	293	496	156	285	220	175
ADGRA2_AGGGATGAGAATAGACTCGG	181	175	99	99	142	215	110	170	68	58
ADGRA2_GAGCTGACGCTGTCTCACAT	398	325	55	107	215	100	68	74	112	56
ADGRA2_GCCACGTTCCTCGCATTCTG	733	1296	586	462	474	506	319	220	304	312
ADGRA2_TGAGCAATAACAAGATCACG	222	204	153	173	125	135	89	33	134	138
ADGRA3_ATCTGAACTATACACCCAGG	390	278	261	182	122	161	244	255	26	76
ADGRA3_CACTCCTACCCATAGTACTG	970	501	294	237	196	243	276	238	182	80
ADGRA3_TGATGGAAAACGACGTACTG	505	412	62	350	165	282	276	150	125	165
ADGRA3_TTCAGCGCATTGCTACCTAC	656	314	131	122	242	117	112	77	247	11
ADGRB1_CAGGATGAGTACCGGCAGTG	1037	1058	777	842	785	628	546	300	334	452
ADGRB1_CCCACGATGAGCGTCACCGA	1341	1034	580	424	298	578	389	417	271	271
ADGRB1_CCTGTGGGGCGAATGCACGC	1080	1261	748	452	685	986	500	695	421	355
ADGRB1_GAAGCATCCGTGTTTGTGGT	1443	2100	2340	1534	1557	1303	2061	2252	937	992
ADGRB2_ATCATCAGCCGAGGGCACGT	826	491	525	457	249	206	356	401	140	192
ADGRB2_CAGCCACTGATAGCAAGTGG	996	895	506	611	445	464	173	455	323	114
ADGRB2_CTCTCTCGTAGGCGACCCGG	982	903	499	491	546	526	334	239	226	108
ADGRB2_TGAGCAAGACCTCGACAAAG	362	325	130	374	228	268	152	101	164	129
ADGRB3_AGGCGAATAAGGACCTGTCA	531	353	318	343	250	305	300	269	237	148
ADGRB3_AGGGTCAATAGAGTTAATGC	181	129	227	181	76	67	263	310	69	57
ADGRB3_CCAAGTCTGCAATCTTACCA	725	443	397	231	219	427	344	426	75	126
ADGRB3_TACAGTACACGGAGTATGGG	812	702	703	612	396	650	395	705	203	158
ADGRD1_AAAAGAAAACGTGACCCCTG	209	67	89	96	92	122	9	35	84	71
ADGRD1_CCTGCTCAGACCCTATCACG	275	238	168	233	164	65	113	130	144	80
ADGRD1_GAAGGGGTCTGGTCGAACCA	281	338	323	160	147	257	128	49	209	138
ADGRD1_TCTCTTCCCAAGGATCGCGG	5	0	0	0	0	0	0	0	0	0
ADGRE1_CACGTGGACTAAATTCACCA	238	135	136	54	34	34	99	57	117	19
ADGRE1_CCAGGATTTGAATCCAGCAG	232	198	166	168	226	143	77	56	100	164
ADGRE1_CCTGCAAAAACCTGTCAGGG	202	334	373	233	111	220	211	259	153	152
ADGRE1_TGCCACCTGCACCAATACAG	411	206	10	36	41	94	7	1	74	24
ADGRE2_ACCGTCACAAGTCTCCATGG	352	376	113	299	193	182	132	135	59	44
ADGRE2_AGACAAGGCCCACCACAGAA	546	166	302	235	222	184	212	229	49	158
ADGRE2_GCACATCGTAGTGGGCCATG	942	1230	773	560	790	881	775	818	261	344
ADGRE2_TCCACCAGCACTCACACGGT	1390	1348	821	267	790	733	574	401	347	230
ADGRE3_ATCATCCAGGGAGACACACA	415	532	277	449	248	279	470	395	276	131
ADGRE3_CACCTCCTCAAAGACAACCG	325	78	94	117	100	27	89	97	63	101
ADGRE3_CAGGTGACTGCAATTACACA	304	111	188	176	164	190	26	188	119	91
ADGRE3_GATTGATCGAACTGAACCCA	460	517	261	130	146	79	55	58	108	236
ADGRE5_ACCGTCACAAGTCTCCGTCG	538	556	508	324	312	456	301	500	135	185
ADGRE5_CCCATCGGAGGACTCAAGGT	242	408	194	134	74	97	51	50	69	4
ADGRE5_CCTTATGGCTCATTATGACG	276	102	130	92	42	83	69	140	59	99
ADGRE5_GGCCTCACCTGTGTTCGAAG	534	617	242	340	283	275	375	405	85	109
ADGRF1_AAAGACAATGTCATTACACT	297	14	0	53	36	33	40	13	67	5
ADGRF1_AATACATCTATTCCCATCAG	423	687	474	405	216	176	244	264	187	251
ADGRF1_CAACGGGGAAGATTGTAGAG	344	508	367	340	237	239	136	234	168	178
ADGRF1_TTCTGGGGATCAAGGCATGA	661	527	714	382	211	355	800	344	501	413
ADGRF2_AATTACACAAGACAGATCTG	548	497	636	495	273	414	290	327	347	179
ADGRF2_AGCAAGCTGTTTGCAAATGT	582	636	529	252	418	312	387	357	179	59
ADGRF2_CAGACACTCAGGGAAATATG	442	436	779	797	457	381	849	891	355	245
ADGRF2_GGACCTCAATGGACAAGCAA	459	446	690	355	323	201	325	423	228	110
ADGRF3_AGAGTGTAATGTCAACCACA	919	419	1290	669	308	396	1147	1247	1103	835
ADGRF3_AGTTCCATTACGGACCAATG	380	469	103	96	187	147	56	56	88	148
ADGRF3_CACAAACCTGGCCTACACCG	1084	455	577	355	236	423	352	126	159	357
ADGRF3_GCTGAGCACCATGAAATACG	425	535	452	319	308	249	219	294	49	96
ADGRF4_AAATGGTCTGGTGCTATCAG	452	418	372	425	336	243	505	388	175	292
ADGRF4_GGAAAAAGACATCACCACAC	321	183	182	128	145	102	87	121	43	87
ADGRF4_TGACTGCAACAAATCCGAGC	474	129	92	191	87	48	130	130	150	2
ADGRF4_TGATGCAGGCATAATCAAAG	267	195	104	79	40	30	72	25	0	13
ADGRF5_AGTCATGTTGTTGAAAAGTG	727	759	653	656	348	359	459	480	275	384
ADGRF5_CATCAAGTGCTGCATAGAGG	898	1320	463	698	571	711	817	681	282	275
ADGRF5_CTTGTAGGACCTATAGAGGG	575	793	463	593	348	636	522	311	264	200
ADGRF5_TCCATCAAGATACCTCCTCG	800	1077	1220	714	742	837	836	1201	562	420
ADGRG1_AGGACCCCATACCTGGAACA	146	62	95	79	36	153	112	52	19	66
ADGRG1_CCCCTGCATACTCACATGTG	847	647	754	266	453	603	372	418	356	458
ADGRG1_GAGCTCGCACATGTCCACCG	346	345	29	201	181	182	223	64	178	50
ADGRG1_GGAGGACCGGATCAACGCCA	371	80	110	129	87	96	82	82	45	192
ADGRG2_AACCCTGCAAACCCTAAGTG	489	435	449	452	355	524	592	533	115	317
ADGRG2_AGAGGAGGCTGGTCAGACAA	543	1087	933	777	579	578	772	936	292	281
ADGRG2_GGTAGTGTTGACATTCGCAG	590	644	370	558	513	429	575	703	266	368
ADGRG2_TGGGAAAGCACAGTGGCCCG	630	535	638	582	329	621	318	352	148	273
ADGRG3_CAGATACTGGCTAAACTACG	828	917	1085	826	453	508	837	975	154	256
ADGRG3_GCGTGTGAGGATATGCACCG	1034	986	931	739	635	767	711	505	510	316
ADGRG3_GTCTGTGGTTGTAGGTTCCG	1258	1870	1767	1221	1105	1446	968	1167	867	670
ADGRG3_TGAGAGAAGACGATCTCCAG	1072	803	677	636	441	617	310	355	241	382
ADGRG4_AGATACTAGACCAGTCTGAG	249	175	212	144	86	79	124	69	3	86
ADGRG4_TGACAGACGAATCAGCACAA	520	401	302	207	242	57	187	110	112	59
ADGRG4_TGGGGTTACTGTATCAACTG	269	223	193	233	223	119	171	132	94	58
ADGRG4_TTTCCAAAGATGGAGTACCC	466	565	302	628	311	417	445	513	245	243
ADGRG5_CTGGGGCACCCGCTTCAGAG	444	674	556	386	252	566	808	336	336	316
ADGRG5_GAGAATATGCAGGTGTCCAG	690	1052	692	781	617	564	536	437	455	369
ADGRG5_TCTTACGTACATCTCCCTCG	1095	1147	309	262	548	640	262	419	244	119
ADGRG5_TGGGCACGTGAACAACCTCA	439	316	549	290	216	130	356	501	304	183
ADGRG6_AACCCATTGGTAACCTACTG	447	830	636	738	451	766	443	471	219	152
ADGRG6_CTAACAGAATCGATAAACAA	246	52	111	36	45	77	110	54	26	68
ADGRG6_TATCTGAATGATATAACCGG	270	119	74	168	123	279	80	70	1	39
ADGRG6_TCCTTAAGGACACGGCAACT	470	1056	616	602	179	349	648	380	431	162
ADGRG7_AGACAGTGCACATCCAACGT	930	675	428	204	297	386	154	119	62	269
ADGRG7_ATTCCAATAGACACAGGCAT	875	1227	514	456	498	485	417	349	306	387
ADGRG7_CATCACTAGTGCTACGCGAG	808	582	819	743	282	528	516	478	220	330
ADGRG7_TTTGGGTAATCAATCAGTGG	432	340	449	121	238	360	117	198	80	73
ADGRL1_ACGGACGCGCATCAAGAGCG	851	627	1015	806	623	875	521	527	590	483
ADGRL1_AGCCGGCAAGAACTACAACA	355	105	168	65	81	33	68	71	28	55
ADGRL1_CCTTCAAGATCATGTCACAG	571	384	246	217	178	82	111	51	125	104
ADGRL1_TGTTGAAGGCATAGTCCACG	294	257	310	38	181	207	119	56	13	5
ADGRL2_AGCTGGACGGAGTTATAACA	265	275	282	349	185	251	225	361	144	86
ADGRL2_CTCTTCGATTTGAAGCAACG	511	241	96	197	141	44	138	147	86	63
ADGRL2_GAGCGCTAACTATGGTCGGA	241	217	78	66	124	118	62	50	56	53
ADGRL2_TCTTTAACAAAGAAAGAACG	85	85	1	29	7	0	13	2	18	24
ADGRL3_ACAGGTTATTGGTCAACACA	599	694	765	666	495	505	572	634	9253	996
ADGRL3_AGGCAAATCTGACATAGACC	324	204	80	79	117	104	27	56	58	46
ADGRL3_AGGCATCTGGCAGATAACAT	349	624	461	128	119	112	155	157	125	243
ADGRL3_CAAAGTTGTGGTCCGAAGGG	335	585	367	485	240	415	289	233	222	80
ADGRL4_AATGTGTCAGGTGATTACAG	531	361	191	157	145	199	230	107	103	128
ADGRL4_ATTTACATTAAGTCATCGAA	323	55	15	55	58	49	0	1	42	27
ADGRL4_TGAAGCCTGCTATTGCAACA	851	849	1061	504	537	730	646	399	405	358
ADGRL4_TGAATTTGTATCAAACTCTG	421	239	154	277	80	182	102	214	83	86
ADGRV1_GTTTAACATTGGTAGCCCAG	705	572	454	358	361	271	230	213	398	21
ADGRV1_TCATACCAAATAATCCATAG	440	429	488	255	160	288	200	288	129	132
ADGRV1_TCCACATCATCCGATCAAGG	411	210	105	111	87	122	72	65	104	72
ADGRV1_TCTTTACTTAAAGGGCGCTG	609	577	170	399	234	121	189	113	227	181
ADH1A_ACAGACTTTCTCTAGAGGCG	203	243	571	350	171	215	195	507	83	73
ADH1A_CACACTGAGGAATAGCGAGT	1028	999	705	532	532	602	278	329	309	247
ADH1A_CCAGTGTAAGCAATCCTCAG	292	305	84	129	118	257	303	133	120	185
ADH1A_CCATGGTACCACTAACCACG	335	105	52	64	49	54	36	1	86	44
ADH1B_CACCTTCTCCCAGTACACGG	503	175	307	111	192	176	220	280	80	60
ADH1B_CTGTCACACAGATGACCACG	621	684	472	558	333	400	332	208	255	304
ADH1B_GTCTGCAGTTAACGTTGCCA	677	418	340	257	316	245	260	239	216	84
ADH1B_TGGAGCAGCCAGAATCATTG	228	188	520	292	120	192	381	252	46	56
ADH1C_AGCAGCCAGAATCATTGCTG	377	723	286	379	282	284	189	259	97	137
ADH1C_CACCTTCTCCCAGTACACAG	388	91	112	31	67	159	23	41	36	47
ADH1C_GGTAGAGGTTGCACCTCCTA	423	549	305	387	301	360	190	306	174	173
ADH1C_TGAAAACATAGGTCACCCCA	609	509	691	713	344	641	641	591	314	245
ADH4_AAATTTAGAATCGATAACAG	368	191	63	52	54	103	35	23	49	47
ADH4_TACATTCTCTCAGTACACTG	463	108	99	231	227	74	193	153	22	58
ADH4_TCAACCTCTTCAATGCAAAG	357	132	12	52	99	29	47	17	0	58
ADH4_TTCCCACACAAATTTGTGAG	312	464	202	131	216	307	186	171	169	89
ADH5_GCTGGAATTGTGGAAAGTGT	311	235	275	118	141	212	290	149	155	23
ADH5_TCAGGGTATAGGCATCGGTG	244	86	58	19	118	42	74	68	4	50
ADH5_TGCTTCCCGGATCATTGGTG	265	186	192	237	80	93	109	217	39	36
ADH5_TGGGTTTACTAAAATCCTGA	222	22	104	16	35	5	0	25	50	2
ADH6_AAAACCCAACTGATGTCTGA	1071	755	727	397	249	523	260	243	285	289
ADH6_CCTTCATGGCCCAAGATGGT	1155	1566	1248	719	697	995	1051	908	493	489
ADH6_TAAGCACAGTGAAACCAGGT	1255	1576	2057	1852	1154	1122	1848	2277	513	516
ADH6_TGCTGCAATCAATACTGCCA	1072	834	369	345	392	363	267	180	300	60
ADH7_AAGACGACGCAAGTGGAACC	611	540	528	312	176	298	319	395	262	159
ADH7_CCTACTCGCTCCTAATGCAA	395	200	40	14	37	66	50	54	34	3
ADH7_CTTGGGACTGATACACTCAG	294	154	226	187	193	159	116	100	54	23
ADH7_TACATTTACCGAGTACACAG	353	95	399	137	118	16	264	179	95	39
ADHFE1_AACCGGGAGTGAAACTACTG	405	321	480	351	147	233	266	155	191	169
ADHFE1_AGGATCAATCAGTCCCAGTG	819	825	1417	997	711	835	973	918	349	585
ADHFE1_TGTCGGTGGTGGCTCTACCA	90	173	50	115	124	80	94	60	40	51
ADHFE1_TTTGGGCTATCCACGCGCTG	566	460	441	391	450	149	404	296	161	136
ADI1_CAGTGGGTACTTCGATGTGA	507	550	474	556	288	165	294	308	36	109
ADI1_CTAGATTAAGATGTTCTACG	260	385	129	51	52	99	139	29	48	4
ADI1_CTGGTATATGGACGACGCCC	871	904	589	527	545	505	510	424	306	96
ADI1_TATGGTTATGATGTCCATCC	405	514	374	647	316	315	553	782	237	84
ADIG_AATGTGAGGTCGTTCACCAG	902	647	407	506	380	398	466	395	124	238
ADIG_ATAACAACAGCAAACCCACA	385	363	117	78	89	72	1	118	12	57
ADIG_GGAGGCAGAACCAGAAAACC	72	182	28	37	2	8	25	11	8	1
ADIG_TCGTATCTCCACAGATTCAG	577	552	775	393	429	283	600	1058	116	192
ADIPOQ_GAAACCACGACTCAAGGGCC	372	374	457	181	300	243	331	306	50	128
ADIPOQ_GTTGCAGTGGAATTTACCAG	157	204	170	193	87	19	27	17	53	35
ADIPOQ_TACCGCTCAGCATTCAGTGT	568	449	674	442	329	369	504	421	245	155
ADIPOQ_TGGATTCCCGGAAAGCCTCG	258	284	40	79	173	95	206	139	156	191
ADIPOR1_CCAGGACACAGACGATGGAG	406	162	129	60	75	96	11	95	81	74
ADIPOR1_GACAACGACTATCTGCTACA	921	527	338	331	130	593	337	297	99	270
ADIPOR1_GTATATGTTCTAGGTCTGGG	222	97	55	134	117	91	99	64	77	122
ADIPOR1_TTTCTCTGAATGACAATAGA	250	316	207	161	126	103	183	58	42	18
ADIPOR2_ACAGGAAGAATACACAACCT	595	920	265	446	551	398	116	255	281	153
ADIPOR2_AGTCTACTGCCACTCAGAGG	901	594	911	616	531	576	524	418	450	374
ADIPOR2_ATGATGGGCTTGTAAGAGAG	656	696	332	415	396	459	320	264	222	181
ADIPOR2_CTCATGATGTACTACCAGAC	939	725	487	412	474	285	498	447	237	350
ADIRF_AGCGGCAGCTCAGCAAGTGG	278	197	39	114	69	74	12	47	58	99
ADIRF_AGTGGTGGACCAGGCCACAG	468	648	220	264	191	252	203	166	109	172
ADIRF_CCAGCTGGCCAAGACCACCC	408	549	413	440	450	495	587	677	901	1492
ADIRF_GCCACAGAGGCGGGGCAGAA	216	408	581	226	101	221	437	280	180	164
ADK_AAAGTCGAATATCATGCTGG	954	643	1018	578	517	567	443	633	663	89361
ADK_ACAGCAGAGATGTCAAGCAG	972	1197	899	647	620	878	830	705	387	438
ADK_GTAGTAATGAGCATCCACAT	798	867	1001	580	575	651	512	471	476	98
ADK_TCTGGAGAAAAACTGGATGT	480	655	576	217	297	367	352	386	98	280
ADM2_ACCCGCGACCCGTCAAACCC	1234	951	911	324	665	656	487	348	490	215
ADM2_AGCTTCCAGACCACAGGTCG	242	384	155	344	241	212	141	86	142	126
ADM2_GAGAGGCTGACCCATAACAG	908	1165	688	668	645	818	491	425	482	342
ADM2_GAGGAGGCTGATGCAACCCA	327	382	385	194	397	267	211	173	1212	139
ADM5_GGCGGCGCCCATAGCTGTAG	1128	1389	1380	1437	779	1009	1374	1195	752	453
ADM5_GGTGGGTCCGGCATACGCCC	404	246	132	178	128	146	139	29	189	77
ADM5_TCCAGTATATGATCTCCGCC	823	1142	768	526	547	704	629	464	423	521
ADM5_TCTCCACCAAGGAGCCCTCG	17	40	68	0	41	0	19	6	37	32
ADM_CGACGCGACATCCAACCGAG	374	257	418	93	246	274	250	193	101	106
ADM_CTAGGAAGGCGAGCGAACCC	397	430	429	359	372	342	535	334	260	192
ADM_GCACCGTGCACGTCCCGAAG	784	883	711	863	414	613	470	451	134	147
ADM_TCTGGCGGTAGCGCTTGACT	437	302	393	147	177	344	293	168	114	95
ADNP2_GCTTATGCGCTACCTCCATG	1139	1320	890	703	807	793	474	363	413	585
ADNP2_GGCGAACAGTCTGATTTATG	202	339	332	305	255	171	312	355	176	175
ADNP2_TGCAGAGATAACCCTCAATG	428	340	126	172	151	216	171	143	159	54
ADNP2_TGGGATTCCAACCTACACGC	520	273	226	76	64	34	75	32	17	67
ADNP_GTTGGTCAGTCAATGAGACT	698	1025	217	296	402	382	217	138	248	220
ADNP_TCAGATTGTATGTAGTTACC	670	724	626	445	319	291	189	219	296	224
ADNP_TGGAGACTGATTAAGCCGAG	290	313	173	137	265	147	102	125	104	37
ADNP_TTGCACATCACTTACGAGAG	704	802	378	748	262	296	395	431	107	174
ADORA1_AGGGGTCAGTCCCACCACGA	328	348	178	166	189	317	126	46	122	259
ADORA1_GAGGACCATGAGGAGAAGCG	539	576	87	120	146	62	208	77	61	57
ADORA1_GGAGAGGGATCTTGACCCGG	477	756	372	505	509	257	286	378	601	148
ADORA1_GGCAGCCAACGGCAGCATGG	931	419	528	292	290	277	234	252	252	256
ADORA2A_AAGCAGTTGATGATGTGTAG	683	373	466	140	305	322	258	154	148	191
ADORA2A_ATGCTAGGTTGGAACAACTG	311	387	248	200	311	338	169	120	30	157
ADORA2A_GCGGCGGCCGACATCGCAGT	608	590	689	356	360	390	390	406	382	164
ADORA2A_TGGCTTGGTGACCGGCACGA	405	611	282	393	301	288	102	276	151	227
ADORA2B_CACCAGCATTATAAGCAGTG	820	1090	526	532	488	417	612	484	237	124
ADORA2B_GGTATAAAAGTTTGGTCACG	218	182	214	157	93	205	169	153	62	72
ADORA2B_TCTCAAAGAGACACTTCACA	14	26	13	0	26	18	0	1	2	9
ADORA2B_TGGAGTCAATCCGATGCCAA	554	343	204	218	293	291	74	75	129	298
ADORA3_ATGGCGCACATGACAACCAG	1565	858	655	430	522	637	362	457	480	381
ADORA3_ATTGGACTCTGCGCCATAGT	365	518	399	310	268	277	235	456	64	175
ADORA3_GACATTTCTGTGGTACTCTG	353	295	253	230	152	312	107	196	178	205
ADORA3_GATGCCCAGGCTGACAACAA	1135	1062	1007	903	542	497	690	547	405	391
ADO_ATGGACAAGCTAGACGCGGG	220	36	146	63	115	129	73	6	93	91
ADO_CCCGGGAGCGAGAAGCCGTG	228	403	235	162	61	256	59	92	190	127
ADO_CGATGTTCAAGTCCTCGGCG	322	891	827	500	409	513	732	445	273	272
ADO_CGTCGCGATCGGAAGCGCCG	655	734	445	633	373	377	243	303	102	150
ADPGK_AAGATGAATCGGTTGGCATG	510	499	628	547	297	444	899	788	306	54
ADPGK_ACTCTCTTACAGCACTATGT	587	316	188	435	340	195	115	121	251	205
ADPGK_CCATCATGTGCAATCCAGAG	501	601	328	350	170	335	179	363	150	140
ADPGK_GCTGGCCAGTATGACTAACA	269	334	261	159	76	200	86	30	119	105
ADPRHL1_CATGCACATCGCAACCGCCG	391	177	33	54	68	106	67	2	114	43
ADPRHL1_CTCCTGGCGAGAGTACGAGG	568	488	468	340	240	372	85	288	137	62
ADPRHL1_GGAGATGGTGAGATGCTATG	831	691	522	508	355	374	207	320	335	181
ADPRHL1_TGCGGCGAACGACACAAACA	484	551	409	243	194	308	214	187	280	203
ADPRHL2_ATGGCAATGGAGGTGCCATG	516	313	456	222	271	522	239	391	263	50
ADPRHL2_CAGGACTGACGTCAGGTCGA	531	802	559	662	468	379	842	798	234	244
ADPRHL2_GATGGCGCCATTGTAACCCA	507	390	492	385	445	477	380	331	214	96
ADPRHL2_TACAAGAAAGACCCTGACAG	308	324	129	138	165	127	71	26	46	84
ADPRH_AAGTGAGCATCGAGAGTGGT	1150	1092	780	389	528	527	323	541	377	346
ADPRH_AGTCTTGGTAATGCTTAGCA	392	377	339	307	263	203	410	293	81	57
ADPRH_ATAGCAGACCACCCTTGCAG	354	86	90	17	89	115	30	67	98	35
ADPRH_GGAGAAGATACACCGGCAGT	535	607	497	523	378	267	428	343	186	229
ADPRM_AACATCTGCGATGACGCCAA	680	618	634	459	306	243	284	270	74	90
ADPRM_CCATTAAACTGGACAAACTG	630	479	287	256	202	157	221	294	173	159
ADPRM_TAAGCATAATAATCTTCTGA	273	185	106	132	133	145	62	35	64	1
ADPRM_TTGTTATGGACATGTTCAAG	505	768	370	327	331	351	374	185	205	121
ADRA1A_ATCTCCATCGACCGCTACAT	386	98	144	120	112	172	122	173	139	145
ADRA1A_CCAAGACGCACTTCTCAGTG	1350	1418	1822	1391	972	891	1346	1177	774	433
ADRA1A_GGGTCCAATGGATATGACCA	225	405	408	321	57	96	403	334	40	176
ADRA1A_TGGCCTCAAGACCGACAAGT	1304	1037	1305	740	1129	943	852	859	651	333
ADRA1B_CATCCTAGTCATCTTGTCTG	527	527	354	466	462	413	251	147	210	172
ADRA1B_CCATTCCAAGAACTTTCACG	282	239	134	53	83	63	54	30	35	86
ADRA1B_CTCCATCGATCGCTACATCG	687	557	582	359	311	333	379	424	257	226
ADRA1B_TCTTGGCCACTATATAGACA	179	122	67	45	49	19	42	17	2	63
ADRA1D_ATCTCCGTGGACCGGTACGT	317	185	151	390	176	112	266	282	52	221
ADRA1D_CGGCGACGTGAATGGCACGG	520	229	235	344	121	197	597	202	111	69
ADRA1D_TACCGCAGAAGCGCTCGTCA	468	85	86	99	77	153	77	23	73	30
ADRA1D_TGCGCGCGACCACGTACACG	391	408	236	383	130	248	172	212	48	238
ADRA2A_ATGATGGCCTTGATGCGGCG	831	984	667	522	369	484	207	398	177	292
ADRA2A_GACGAGCACGTTGCCGAACA	1190	1280	1141	964	810	629	1055	925	528	373
ADRA2A_TCCAGCGCGTCGGTGTCGCG	492	566	917	625	510	208	969	1012	754	1325
ADRA2A_TGGTCGTTGATCTCGCAGCG	542	961	751	902	541	631	707	990	364	301
ADRA2B_CAGCCCCGACCCGACCATGG	1056	674	445	733	409	543	916	629	242	319
ADRA2B_CGGACACTCGAAGTCCACTG	1542	1044	676	503	497	501	590	499	404	449
ADRA2B_TGGAGTTGTACTCCAGCGCG	1051	1601	2076	2119	1190	1507	2371	2107	908	730
ADRA2B_TGGTCGCCCTTGTAGATGAG	1412	1134	873	909	610	893	810	637	457	543
ADRA2C_ACACAGATGCACGATCGACG	619	364	251	128	165	99	122	233	90	41
ADRA2C_ATGGTGGCCTTGACGCGGCG	213	385	311	655	223	321	589	681	187	144
ADRA2C_CTACGCGCGCATCTACCGAG	310	216	32	73	110	120	44	2	83	51
ADRA2C_TGTACCAGGTCTCGTCGTTG	1212	1624	1359	994	920	995	982	1267	838	655
ADRB1_CGCACGCCCGTTGGCCAGCG	236	315	778	739	428	382	522	484	205	93
ADRB1_GTAGAAGGAGACTACGGACG	163	178	54	199	190	150	123	106	46	200
ADRB1_TGGCCATCGCCAAGACGCCG	617	323	558	455	254	273	653	257	249	282
ADRB1_TGGCCCACACGGTGCACACG	337	481	663	495	406	614	1036	772	576	269
ADRB2_ATCCACTGCGATCACGCACA	1015	1065	510	644	588	807	424	789	502	420
ADRB2_CAGACGCTCGAACTTGGCAA	457	501	613	456	480	382	947	461	202	260
ADRB2_CCCTTTCCTGCGTGACGTCG	1624	2049	1955	1538	1443	1194	1538	1480	1048	612
ADRB2_GGGAACGTAGAAGGACACGA	1357	1032	833	433	301	401	751	235	357	242
ADRB3_ACCAGTGCGCCGTAACGCAG	961	742	372	371	313	351	307	305	185	442
ADRB3_CAGCGAAGTCACGAACACGT	503	423	370	164	166	284	206	241	124	50
ADRB3_CCAATACCGCCAACACCAGT	455	118	191	115	81	110	66	75	65	153
ADRB3_GATGGGCGCAAACGACACCG	582	439	557	352	266	232	380	211	196	145
ADRBK1_CATCGCATCATTGGGCGCGG	930	918	513	383	753	1023	408	444	1928	272
ADRBK1_CCAGGTCCGAGATCCGCACG	278	274	253	302	165	203	100	94	217	192
ADRBK1_CTCCTCATAGAATTCCACCA	495	315	700	542	433	445	598	513	185	121
ADRBK1_TCTGGAACACGTCCCCTCGG	1042	1062	679	748	549	651	561	669	278	200
ADRBK2_ACTACTTACACACTCGCATG	411	441	249	147	181	122	162	232	86	69
ADRBK2_GATGAAGCAGAGTTTATCTG	580	866	538	687	307	300	667	576	305	175
ADRBK2_TATTGGACGAGGAGGATTCG	996	1227	1587	848	736	777	993	1055	825	515
ADRBK2_TCTTCATAAAACTTCACCTG	560	518	381	284	238	290	181	438	159	89
ADRM1_ACGTGCTGAAGTTCAAGGCA	1282	735	397	305	529	310	141	147	376	356
ADRM1_CACGAACTCTCTGCGCTAGG	284	259	92	245	92	206	5	198	97	78
ADRM1_GCTTGAACTCACAGTCGTCA	1276	360	290	131	315	392	298	128	128	98
ADRM1_GTGACTCCGGATAAGCGGAA	575	336	209	253	295	280	140	202	307	132
ADSL_AAATGTGTGAAACCTAATGT	384	402	55	42	148	416	84	1	73	60
ADSL_CAGCAACGTTCTGAACGCAT	372	10	100	17	2	47	72	43	29	8
ADSL_GGTATAAATTCCGGACATGG	184	240	23	25	89	81	29	10	37	8
ADSL_TATTGAAGTACTGTCTGTGC	513	382	11	19	107	120	2	14	126	5
ADSSL1_ACGTCACCTATGTTCTGCGG	749	806	582	490	427	389	554	593	232	362
ADSSL1_ACTCATCAAAATCTGACAGG	437	544	363	394	264	413	276	262	115	196
ADSSL1_CCTCAAACAAGCCTGGCAAG	355	220	156	141	244	261	90	134	212	138
ADSSL1_TACCGAAGTCAATGTCGAGG	1177	881	770	396	593	593	467	495	306	290
ADSS_AATTTGAAGAGGTTACAAAA	223	164	159	177	65	73	258	102	82	127
ADSS_CAGCTTTGGACGAATAAACT	148	289	65	178	120	203	36	30	113	41
ADSS_TGACAGAGCTCATATTGGTA	335	533	400	164	261	271	186	200	113	43
ADSS_TTTGGATTAATTATTCCACT	219	143	101	139	92	370	0	60	68	28
ADTRP_AATTATTACATCTCACAGGA	330	172	102	56	88	84	110	64	56	7
ADTRP_GTGCTGAAAAGAACCAAAGG	255	142	129	109	162	141	44	130	115	114
ADTRP_TCTTGGCAAATGGTGCAAGG	727	754	861	570	829	603	501	581	143	297
ADTRP_TTGCATGATTCAGCCACACG	540	638	383	291	241	446	359	497	211	266
AEBP1_CCAGACCTTTCATGGGAACG	361	580	370	601	201	307	450	431	74	172
AEBP1_GCACCAGGCTGCGCACACGT	655	317	462	382	352	434	614	789	165	193
AEBP1_GCGCCGAATGTACTCAACTG	304	274	355	335	123	405	524	358	100	194
AEBP1_GTGTGACTCCATCCCAATGG	1375	986	627	648	568	531	383	529	329	373
AEBP2_CTCCATCTACCAGTCAAAGT	251	187	137	98	25	50	97	100	10	30
AEBP2_GAGGAGCCCAAGGGACCGCG	286	106	260	222	138	189	60	101	65	98
AEBP2_GCGGCGCTGCTGCTGAACGG	400	356	681	695	277	299	414	330	162	243
AEBP2_GTAGACAGCACAATTTCCAG	377	313	207	145	161	296	102	89	70	450
AEN_ATTGCCATGGTAGCTCACAA	402	399	925	530	370	538	526	630	353	186
AEN_CGGGTACGGTAGTCAGCGAT	1282	1164	815	658	616	971	771	515	658	133
AEN_TGAGCATGCCTCCAGAACCA	1004	1051	1125	495	669	478	711	545	381	275
AEN_TGTGGCTATCGACTGTGAGA	663	601	174	518	298	373	232	181	141	65
AES_CAAGCTCGAATGTGACAAGT	204	75	144	99	95	68	82	125	48	56
AES_CCTGCCCTACCTCTCCCAAG	291	175	30	103	139	78	32	21	48	28
AES_CGGATGATAGAGTTCAGCTC	212	37	107	136	70	44	28	66	149	62
AES_GTGGTGAATTTGAGTTGCTG	859	1227	855	870	712	960	873	750	485	497
AFAP1L1_CATCCACAATCGAGTGTGAG	477	790	888	509	297	433	500	615	328	201
AFAP1L1_CGAGCTGCGTTTCACCCAGG	460	654	570	228	242	386	165	163	208	119
AFAP1L1_GCAAGCTGTTCAGAGGACAT	416	665	263	429	316	225	190	255	188	133
AFAP1L1_GTATTTCCACAAGGATCACA	826	1029	1210	842	769	662	1007	944	397	357
AFAP1L2_AATTCTTACTGGATGTCTCG	651	428	209	192	228	267	61	56	66	247
AFAP1L2_GCAGGGCCTGCTACCCAATG	408	462	261	571	327	514	188	257	48	103
AFAP1L2_GGAGGAGCTGTATGACGACG	738	723	709	639	395	477	405	332	254	336
AFAP1L2_TGAAGGAAACCAGTACACCC	481	550	270	94	153	346	175	51	206	113
AFAP1_AATTACCACATGTAATGGAA	335	72	151	60	72	29	182	156	101	46
AFAP1_GAGGACACTCTGAATCCACG	257	261	243	186	99	125	126	178	101	46
AFAP1_GATGTTTAGAATCCAAACCC	96	146	14	9	27	29	24	0	9	0
AFAP1_GTAATGTTACAGCCTTGGAG	683	1007	671	676	567	501	688	499	175	419
AFF1_AATCTGTCACCGAAGCACAG	783	316	265	182	105	95	89	167	73	138
AFF1_ATGGGCCGGACATAAGCCGT	367	767	771	765	424	680	718	415	359	224
AFF1_GCCTGAGAGAGCCTTAGAGG	584	874	466	581	411	393	257	370	226	162
AFF1_GGAGCACAGAGCCCCCACGG	443	751	264	156	359	461	282	154	189	154
AFF2_CCTCCAGAAATAATGCACGG	459	550	245	334	203	265	142	244	132	83
AFF2_GAGCTTCATGACCCACCAAG	669	794	381	691	490	795	346	258	254	325
AFF2_GTACTCTAGAGAGTAAGTCA	331	355	475	302	311	298	445	584	133	40
AFF2_TTTACTGCAAAACAAGCATG	534	726	597	525	364	447	321	367	343	328
AFF3_CAGCCTCTGATCATTCCCGG	372	139	338	68	132	130	109	33	107	64
AFF3_CAGCTTAGGAGACTCATCAG	282	208	92	142	165	287	188	178	153	61
AFF3_GAGCAATCAGTACTACAACC	462	288	193	102	62	90	48	65	38	97
AFF3_TCTTTCTCCAGACTAACAAG	384	44	60	50	72	58	10	26	31	31
AFF4_ACAATGCCGAGGAGTACACC	851	512	622	500	411	481	497	543	179	131
AFF4_AGGCGGGTGACACTTTATGT	279	355	254	380	106	73	126	119	80	154
AFF4_TGGGAATGATCACCATAGCA	445	459	432	232	189	203	126	187	47	70
AFF4_TGTATGAATAGCCGTTAGAG	151	232	29	75	62	38	112	15	108	58
AFG3L2_AGGAAAAACTCCTGTTGATG	542	670	877	398	557	384	472	311	346	231
AFG3L2_GAATGAGACTCACTCTAGCA	320	240	11	13	58	10	2	10	10	29
AFG3L2_TGTCGGAGAAACCACTGCCA	753	787	142	266	284	225	218	141	168	168
AFG3L2_TTCCACTCACCTGAAAACCC	646	159	117	14	98	96	9	8	19	40
AFMID_ACAACCTTCAGACGACTCGT	346	126	50	74	18	119	6	63	15	73
AFMID_CTCCCAGTCGGACAACCCAT	618	848	609	668	607	383	426	697	221	460
AFMID_GCCGTGGTAATAGTGGCTTA	416	561	575	736	162	187	593	694	186	158
AFMID_TCTGGACAAACGCAACGCTG	437	238	50	210	77	84	68	242	22	29
AFM_AAAAAATATGTGCTATGGAG	315	462	273	222	144	260	137	183	112	107
AFM_AGAGAATATTCACCGTGTCA	619	724	634	434	433	325	344	348	204	186
AFM_AGTCAACTGCCTTCAAACAA	286	265	98	45	75	60	55	41	96	21
AFM_TATAACAAGAAATCTGATGT	335	437	793	373	318	388	1060	859	339	141
AFP_ACATTGACCACGTTCCAGCG	466	609	507	455	461	175	362	220	155	122
AFP_AGTGGCTTCTTGAACAAACT	315	579	726	395	342	414	513	742	156	153
AFP_AGTTGAATGCTTCCAAACAA	198	126	188	309	54	140	202	251	61	26
AFP_ATTGTAGGTGCATACAGGAA	312	181	184	225	271	176	407	234	136	40
AFTPH_ACCAGATTATACTCGTCCCA	324	272	72	184	206	148	64	58	10	72
AFTPH_ATAAGCATAGTGACTAACAG	403	219	82	229	114	110	221	156	126	94
AFTPH_TGAGTACCAGTAACAAAAGG	360	220	262	209	40	372	210	360	172	33
AFTPH_TTTGTTAGAATCTCCAGACA	527	161	136	39	156	200	46	72	134	119
AGAP11_GCGTGGGAACTCCCACTGCG	360	746	453	425	302	211	382	374	331	269
AGAP11_GCTGGGAGTCAATGGAATGG	470	260	216	113	229	307	111	160	145	203
AGAP11_GGAGTGACCCAGACAAAGGG	532	150	95	60	162	171	30	64	22	57
AGAP11_GTGGCACGTTTGGCCAGTGA	184	255	89	149	138	56	80	84	90	57
AGAP1_ATTGTGGGTAACTTGGCCAG	291	276	162	292	83	186	387	272	140	149
AGAP1_CACCTGCGCGGAACAGACGG	1389	1723	1656	1570	1196	1707	1421	1552	847	641
AGAP1_TTACCACTACTACAGTCGAA	1045	475	345	503	381	134	493	336	139	149
AGAP1_TTCGCAAGCAGTCTAAGCGC	547	155	221	210	143	164	260	251	74	63
AGAP2_CCGGTGACCAACATTCGGTG	520	511	275	258	228	127	189	129	95	98
AGAP2_GATTACATCCACAGTACCCA	616	199	246	159	256	239	179	245	92	204
AGAP2_GCAGCTGAGTTCCCTTCGCG	880	625	462	228	238	276	191	117	82	140
AGAP2_TCAACTCACTAGGGGAAGCG	432	141	159	206	240	340	126	178	130	74
AGAP3_CTGCTGTCGTCGATAACCCG	458	363	303	233	311	227	102	124	221	138
AGAP3_CTTTAAGCTCCGGTACGGAG	407	423	165	160	189	291	162	106	187	59
AGAP3_GAGCGGAGTAACACACAGCT	518	500	259	501	359	550	283	326	362	115
AGAP3_GGGATCCTGCTAAAGCGGAG	535	754	637	661	342	571	543	475	75	166
AGAP4_GATGGGTGTGCAGGCCGATG	468	52	35	78	63	155	32	41	0	74
AGAP4_GCATCTCCCGGTCACGAACG	345	500	185	175	141	102	114	35	89	75
AGAP4_GGTGTCAGCATGATTCTCCG	399	148	102	53	107	14	1	45	83	164
AGAP4_GTGGGAGGAACACTGAACTG	463	288	86	114	280	383	1	57	24	18
AGAP5_ATTACGAAGAACAGAAATGG	434	403	268	148	205	176	211	335	159	49
AGAP5_GATGGGTGCACAGGCCGATG	2028	1528	902	721	648	855	506	345	642	290
AGAP5_GGTGACCGTTGAAGTTGGTG	631	824	314	378	568	606	413	522	424	236
AGAP5_TGTCTGCCACTGGCCAAACA	1071	999	1017	705	646	615	1313	788	241	550
AGAP6_CACCCACGCCCGTTTGCAAG	1196	1126	1488	896	687	557	689	921	307	174
AGAP6_CGTGACCGGGAGATGCCTGA	807	177	257	420	210	146	262	321	44	112
AGAP6_GAGCATGCCATTGGAACACA	1015	396	402	216	288	249	52	40	294	121
AGAP6_TTATTAGCATGAGGAGAGGG	943	856	1122	729	673	897	623	683	517	289
AGAP9_CATGGACCGCTTGCAAACGG	325	352	136	160	194	85	113	129	97	35
AGAP9_GATGGGTGCACAGGCTGATG	338	379	96	56	233	203	93	97	64	153
AGAP9_GGTGACTGTTGAAGTTGGTG	574	266	107	49	180	65	27	36	46	66
AGAP9_TTTCTTCATAATGTGCACGG	577	259	177	181	200	186	57	141	130	90
AGA_ATGGTTGTAATCCATAAGAC	243	129	171	172	61	69	53	82	33	2
AGA_CCAGATCCCTCAAAATACTG	704	238	186	190	166	329	226	190	105	44
AGA_GGGCCAAGTGTTGACGACCA	1185	1425	1372	1205	857	870	940	900	713	413
AGA_TGGAGGGCATTAGCATCTGG	315	456	546	465	204	149	337	338	123	183
AGBL1_AGAGGAACTGATGCAATATG	442	527	450	287	259	393	231	200	171	197
AGBL1_GCCTACGTGCAGATCCGACG	418	179	225	159	150	150	99	151	165	83
AGBL1_GGATATTTGAGGATATTCGG	205	191	115	84	86	112	44	42	27	27
AGBL1_GTAGGTATAGGGATAGTGGT	400	487	307	283	199	269	117	140	80	102
AGBL2_AGATATTATTCTTACGACTG	317	304	142	214	185	75	128	99	17	130
AGBL2_AGCCCTTCTACTGTCTCACG	531	294	216	345	302	189	155	186	232	72
AGBL2_AGGCAAACGAGGAATTGTCA	911	519	547	501	338	435	463	769	263	120
AGBL2_CAAAAAGCCTTTCATAACCC	385	264	399	300	120	383	379	268	180	126
AGBL3_CCATGTTCCTAGCAAGCGTG	1429	1553	1084	1010	1249	983	1361	850	696	598
AGBL3_CCTGCTAGTCTTTACAGTCG	371	321	159	70	219	352	129	161	138	114
AGBL3_TGAGAGTGGTAATCTACAGA	852	704	270	656	286	458	221	419	302	324
AGBL3_TTCCGGGTATACCATACAGA	335	124	151	119	66	177	139	98	78	131
AGBL4_AATCCTGATGGAGTCTACCT	1091	902	659	647	703	974	711	332	347	390
AGBL4_ATGATGAGGGTGTTTCCCCT	1320	1323	1563	892	668	817	1190	969	728	509
AGBL4_CAGGGCTGGTTATCGTCAGG	1186	1132	762	693	701	814	657	568	527	272
AGBL4_TTGAACCAGACTCGGAAGCG	370	507	381	588	381	355	333	336	99	347
AGBL5_ACACCATCGGGGTTCAACAT	240	438	209	245	77	55	171	111	166	23
AGBL5_ACATGGCGGAATGTAATCCG	350	272	365	114	189	306	255	140	99	46
AGBL5_GGAAATAGCTGCTCTAGACG	278	269	607	286	286	354	414	470	1773	87
AGBL5_TTCTACTTCAGCGTCCGGGG	329	248	145	88	171	133	96	85	187	104
AGER_CATCATAGGAGTATCTGTGA	669	605	1326	837	652	958	992	1037	630	299
AGER_GTCAGGGTTACGGTTCCACC	950	1233	983	770	332	445	546	500	338	173
AGER_GTGCTCAAAACATCACAGCC	853	589	513	471	555	495	418	685	253	393
AGER_TGGAATTCTTACGGTAGACA	467	563	421	414	370	258	553	282	341	170
AGFG1_ACCACAGGTAAAGCTCCTGT	377	662	281	244	247	192	268	227	53	254
AGFG1_CAGTTGTAGGTCGTTCTCAA	413	617	269	354	185	309	339	332	236	104
AGFG1_GCCGACCGTCATGTTAACGT	1351	760	948	743	390	681	1524	924	317	242
AGFG1_GGTTCCAAAATCAGCACTGG	167	246	131	87	111	184	89	56	49	1
AGFG2_ACTGACCTGCTGGCTGACAT	493	623	172	213	311	309	139	61	194	269
AGFG2_CCGACGGCACCACACCTCCG	1564	1287	1098	556	920	729	475	686	490	389
AGFG2_CCGAGCGTGAGACTGACTGA	1226	1488	1834	1194	1136	826	998	1273	873	714
AGFG2_GATTGACTTGACACGATGAG	1676	1493	1342	1536	1052	1252	1080	1616	733	672
AGGF1_ACAATAGTAATAAATTCCAG	192	133	47	30	34	18	23	21	37	26
AGGF1_GGAGACTGATAGTGAACCAG	199	148	116	76	156	141	24	63	113	104
AGGF1_TAAATACCTGAGATTGACCA	294	299	132	123	102	66	114	36	86	87
AGGF1_TTTCTGTTCTATCGGTACCA	555	757	544	579	351	313	447	442	124	102
AGK_CAAAGAAGGCCTTTGTACAG	217	412	105	142	65	148	74	52	113	23
AGK_GCAATGACCGGCCTTCGATG	416	304	284	219	217	233	401	346	121	121
AGK_GCCAGATAAATGTAAAATCG	223	160	276	136	127	235	152	78	73	208
AGK_TGTTCTTCGACGAACAGATG	372	193	219	357	219	142	282	263	82	89
AGL_AAACACGAAACCTTATAGGA	446	301	219	254	233	158	262	277	82	125
AGL_ACGCTATGGGAATAAACCAG	481	590	382	203	156	301	208	167	159	74
AGL_ATGCGTAATATCCATAAACA	273	31	33	19	37	8	1	19	49	42
AGL_TGAAGAGTAACACAGTCCAA	669	631	459	343	271	526	511	383	198	57
AGMAT_GACAGTCAATCCTAGCACGG	475	246	66	221	171	135	90	139	200	23
AGMAT_GCACACGGACACGACCGACA	950	322	176	171	257	314	178	212	176	236
AGMAT_TCTCCTGGACTGTAAGCGTG	124	103	78	98	31	1	43	48	22	3
AGMAT_TTGCAGACTGACATTACCCA	635	394	286	332	309	209	237	170	117	183
AGMO_AGATGAACAGCATATACTGA	529	651	726	425	254	417	695	636	344	309
AGMO_CTTATTGAAGAATCCAGGTG	261	249	243	281	183	288	270	179	65	75
AGMO_GCTTACCATGAGCCATACGA	507	222	297	242	120	121	149	227	78	68
AGMO_GTTTGGAATGAAGTTTCACT	327	481	787	432	326	462	895	821	157	299
AGO1_AAGAGAACTGTACCATACAC	805	336	29	78	132	196	32	26	46	44
AGO1_CAGCATTCGCCAGCTCACAA	609	492	360	360	213	470	520	280	2726	196
AGO1_GAACGCGCTGAGAGTCCGTG	573	501	458	480	282	120	202	359	110	100
AGO1_GATGCGGGGATGCCTATCCA	353	560	421	125	121	301	119	161	64	191
AGO2_AAGGTGGAGATAACGCACTG	530	935	436	298	334	525	325	471	356	321
AGO2_CCTGTCCGACTTGTAAACAT	718	572	380	471	170	271	400	392	263	252
AGO2_CGGAACAAGCAGTTCCACAC	990	909	829	802	955	769	969	1121	350	408
AGO2_TAACGCCTGCAAGCTCACGC	1052	194	160	123	88	70	111	60	17	37
AGO3_ATGTCGTAGCACCACATCAA	412	322	338	484	281	341	143	132	75	107
AGO3_GGATGACGATAATAAGCTGT	349	292	191	149	185	163	133	140	82	99
AGO3_GTGTTTGTAATGTAACAAGG	595	267	153	102	42	103	103	117	62	70
AGO3_TGTGAAGGCATTACTTCTAG	279	128	178	273	110	114	289	133	61	87
AGO4_AAAGTTGAGGTGACCCACTG	664	760	440	190	351	293	297	152	222	68
AGO4_CCTTACCTGTTGACTCTACG	979	952	233	554	533	369	414	714	550	521
AGO4_GAAAAAGGAACGGCCCACTG	424	334	426	455	226	351	621	782	243	114
AGO4_GGATAACCACTATTAGCTGT	452	318	533	375	364	354	267	289	243	180
AGPAT1_CCTGTACGGGATCCGAGTGG	513	530	1060	1041	827	572	1157	755	1256	2926
AGPAT1_GAGGGAACGAGAAACCACAA	490	331	184	164	93	179	280	167	192	18
AGPAT1_GTCCTCGCACGGCACACACA	493	197	76	171	248	139	121	163	90	88
AGPAT1_TGGTTGGAGACAACAACATA	423	637	227	394	215	344	251	250	250	175
AGPAT2_ATGACAGTGATGGCCGACCT	509	321	460	185	356	456	128	40	189	245
AGPAT2_CAAAGTGTGGATCTATCCCG	271	219	51	134	49	142	94	33	38	0
AGPAT2_GCTGCGTGCAGATCGCCAAG	278	180	72	80	59	131	19	21	127	50
AGPAT2_TGGCGTAGAACTCGGCCGCG	192	232	141	85	108	61	64	22	151	71
AGPAT3_CAAGCACCGCGTTAGCATGG	797	823	659	506	474	417	499	854	192	199
AGPAT3_CACTCACCCACATGTACTCG	707	827	1147	703	596	896	809	977	560	421
AGPAT3_CTTCCCAAAGCGCTCTACCG	660	781	312	459	217	286	391	360	300	30
AGPAT3_TACCACGTCCAGCCGATGAG	1258	1990	1157	880	802	1192	659	992	472	375
AGPAT4_ACAGCCCAAAGCGTTCGGAC	1059	485	918	889	433	536	856	956	325	283
AGPAT4_CCATACTTGAGGTAGGCGCG	897	1264	1191	1139	730	719	1241	1200	491	462
AGPAT4_GATGTGGTACTTCACCGAGA	839	812	985	493	524	534	1064	634	421	247
AGPAT4_TACATACAAAATACTTCTCG	609	228	348	130	103	187	128	104	172	52
AGPAT5_AAAATCACAAGATACATCTG	758	623	613	665	679	763	338	617	484	14286
AGPAT5_CTTCTTCGAGAATTACACCG	442	614	441	451	168	285	531	678	89	124
AGPAT5_GACCCCCCAGGCCAACACGT	1096	596	517	494	414	515	532	229	322	147
AGPAT5_GCAAAGTAACACCCATACAA	603	123	100	154	175	243	28	109	52	60
AGPAT6_AGCGCTCAAACCAGACGTGT	371	330	125	138	94	130	54	93	120	99
AGPAT6_CTTTACAAGCCCTACACCAA	519	372	176	158	39	139	117	182	89	73
AGPAT6_GATGATCACATCGATCGGTG	668	247	677	401	449	469	625	484	373	311
AGPAT6_GTAGAGTTTGCGGATACCAA	441	440	336	287	380	330	200	309	260	119
AGPAT9_GATAATGAATGGTACCAGAG	215	436	308	337	101	134	139	158	90	70
AGPAT9_GCTGGTTATAGGAACTACAC	736	357	516	455	257	250	262	516	101	139
AGPAT9_GTCTGCGGCTCACTATGGTG	1599	1455	1277	1114	917	1273	1046	996	492	1635
AGPAT9_TCAAGATTAAAACATCAATG	581	135	134	248	291	171	181	57	35	58
AGPS_CAATTTGACAGCTCATGTAG	332	83	70	49	103	140	16	45	29	13
AGPS_GAATATCTATGGCAATATCG	283	174	152	52	81	115	75	61	126	51
AGPS_GTACCAATGAGTGCAAAGCG	441	815	519	493	302	576	563	376	226	409
AGPS_TGCCACTAAGAGGGTACCTA	221	200	430	218	51	159	245	140	74	53
AGR2_AAGTGATGAATAATCATCAA	509	563	527	450	198	276	335	342	86	253
AGR2_AGAGATACCACAGTCAAACC	215	93	220	241	190	115	108	169	157	466
AGR2_ATAAATTACCTTGACTGTGT	867	725	411	297	397	283	349	343	175	181
AGR2_GGAAACTTACAACCAGATTG	553	1131	1198	594	534	541	564	550	521	343
AGR3_AAGAAACTGTGACGAGTAAG	470	691	570	588	392	443	487	364	231	241
AGR3_AGGTGATAAATTCTTATCAG	233	357	440	310	250	248	201	351	86	116
AGR3_GAGGATTGTCAATACTCTCA	359	215	331	87	85	238	75	193	76	108
AGR3_GCACCTCTTGAGAGTGTCTG	281	500	175	188	205	185	73	95	240	154
AGRN_ACAGCGAGGGCTCTACGTAG	1113	1215	652	676	653	687	527	410	402	151
AGRN_AGCAGCGATGAGGAACTGAG	1373	1178	728	991	579	668	1115	866	224	332
AGRN_GTGGCCCCCGTGATAAACGC	628	662	410	247	150	335	244	318	83	114
AGRN_GTGGCGCGCAAAGGACCCTG	396	703	678	774	344	377	633	868	894	218
AGRP_ACGCAGCGACGTGAGGAGCG	380	312	120	69	227	122	52	40	74	52
AGRP_AGAAGAGGATCTGTTGCAGG	574	664	696	662	564	338	460	380	722	291
AGRP_CCTGCAGGTACTAGACCTGC	757	805	1176	760	755	849	834	607	281	314
AGRP_GCCACGCGAGGAGCCCAGAT	569	690	350	601	494	654	377	506	474	90
AGTPBP1_AGTAAAGGCTAGAATTAATG	367	469	245	172	180	356	168	215	118	104
AGTPBP1_GACCATGGTGGATTCGTATG	387	924	496	540	600	519	462	289	455	252
AGTPBP1_GAGTGATATCATAGATCGTG	755	692	596	339	408	396	457	368	194	247
AGTPBP1_TTCATCGGTAGAACAAGCAT	1291	621	548	640	345	686	514	545	392	85
AGTR1_CAAGCATTGTGCGTCGAAGG	386	473	667	327	377	209	594	467	216	69
AGTR1_GCTGTGTAGACAGCCCATAG	166	399	356	250	356	220	332	322	351	112
AGTR1_GTAGAAACACACTAGCGTAC	317	237	1	122	154	173	21	60	36	72
AGTR1_TCAGGCCCAGCCCTATCGGG	434	627	372	506	482	331	438	298	309	159
AGTR2_ACAGGCCATACACCAAACAA	859	547	166	265	234	367	287	202	145	190
AGTR2_ATTGGGCATATTTCTCAGGT	800	1090	1216	704	769	915	880	1200	782	593
AGTR2_GGAGTAAATCAGCCACAGCG	837	847	389	525	295	259	336	193	250	348
AGTR2_GTACCTATCAACACTCATGC	1394	462	414	240	375	380	358	356	318	259
AGTRAP_CTCCATCGACGCCATAAGCA	396	150	170	137	105	75	54	95	65	81
AGTRAP_GCCTGCTGTGAACCTGAAGG	302	339	348	320	216	366	462	401	278	345
AGTRAP_GTGTCCGTGAGGCTGACCCG	459	608	223	351	214	254	64	251	147	127
AGTRAP_TGGCCATGCCCACGCCAAAG	250	434	885	1224	254	213	820	1370	327	601
AGT_AGAGCGTGGGAGGACCACAG	379	308	56	18	172	206	166	59	109	140
AGT_CTTACCTTGGAAGTGGACGT	682	840	800	598	225	290	389	573	254	78
AGT_TGTCCTTCCAAGGAACACCC	522	194	118	294	146	148	111	104	67	53
AGT_TTGACACCGAAGACAAGTTG	909	1431	1402	1348	948	795	1157	926	622	499
AGXT2_AACACTGACAGTAACAATCC	454	298	396	323	289	317	614	559	135	139
AGXT2_ACACTTGGCTTGACAAACGT	333	285	95	48	188	177	11	55	75	16
AGXT2_CAGGAGAAAGATGTTCCTTG	274	368	125	355	181	271	133	203	164	126
AGXT2_GCACTGGAGAATCTCGACAG	328	404	239	187	157	441	128	244	161	31
AGXT_CCCCTTTACATGGACCGGCA	386	409	194	120	111	301	141	256	182	101
AGXT_CCGATGACCAAGGACCCTGG	500	644	820	509	302	313	1149	1288	402	236
AGXT_GCTGCTGTTCTTAACCCACG	315	200	248	422	99	341	359	439	64	121
AGXT_GTCACTGAAGGAGATGAGCG	548	943	712	826	428	588	697	741	891	213
AHCTF1_CCACCCAAAATGGATTCCTG	668	334	277	225	138	255	251	204	204	86
AHCTF1_CCTACATGCAGACTAGCAGG	1010	653	141	129	281	320	102	91	219	88
AHCTF1_GAATTCATGATTCTGAACGC	585	208	182	82	67	170	25	123	174	146
AHCTF1_GTTAATCCTTCGTCCAACAC	280	166	111	135	189	163	61	105	127	103
AHCYL1_ACTCAGGAAACGTGCTCAGG	642	341	102	158	106	148	29	73	42	55
AHCYL1_AGATGTTACAAGCAGACCAG	859	573	240	243	380	510	292	119	162	222
AHCYL1_GATGTTTGGTGGGAAACAAG	346	356	71	113	170	103	139	54	79	121
AHCYL1_TGGGGGAGACTTAACCCACT	276	449	270	39	131	149	48	122	25	58
AHCYL2_AGTACCTTCTTGACTGTGCG	423	604	621	818	442	451	986	700	1101	259
AHCYL2_CGATAGATGTGTGAATGTGG	750	681	434	697	478	676	505	329	343	284
AHCYL2_GGAAAGCAAGTGGTAGTCTG	539	565	649	691	430	569	699	548	314	211
AHCYL2_TGATGATGAGACATCGCCCA	937	1064	509	554	423	499	359	433	481	195
AHCY_AACATGATTCTGGACGACGG	534	583	155	81	285	199	48	22	105	32
AHCY_CTCTGAGGAGACCACGACTG	520	786	282	180	239	376	117	85	186	224
AHCY_GATGATGTCAATACAGCCTG	629	270	200	40	286	227	106	35	89	86
AHCY_GCGGGCTCCGAAACCCCGCA	347	428	307	441	334	288	457	321	187	100
AHDC1_CAGAGGTAAAAAAACGACGG	85	148	58	108	97	29	99	85	63	25
AHDC1_GTCACCCCAAGTACGCCTTG	918	925	1399	894	674	989	1188	1013	417	405
AHDC1_TCCGCCGCCCCAGCGATACG	507	987	654	355	506	671	517	441	498	178
AHDC1_TTGGGGCACCCACGCAAACG	338	221	132	193	162	312	64	92	85	59
AHI1_AATTGGATATCCATCCCGGC	192	142	349	279	181	226	349	307	73	66
AHI1_AGGTCTTGTGTAGTCAACTG	470	353	150	214	358	299	173	228	227	90
AHI1_CATGTGGTTGATGAGCATAC	1072	969	1313	879	872	853	1628	863	549	425
AHI1_CCTGAAGAGCCATCATAGAG	313	337	495	337	301	412	400	337	187	102
AHNAK2_CAGAGACACCTCGACATCGG	303	198	213	236	213	127	84	60	206	199
AHNAK2_GGCCCCAGGCGAGTCCATCG	491	416	203	95	131	274	44	138	97	161
AHNAK2_GGCCCCGAAATAGACATCAA	317	111	553	399	313	136	421	361	144	134
AHNAK2_GGGGCCGATACCCCGAACGA	281	694	946	757	407	348	1064	902	250	146
AHNAK_GGACCTTTGACATCAACTTG	361	293	239	194	196	172	200	222	80	99
AHNAK_GGTCCTAAGCTTAATATCGA	525	533	364	372	166	238	247	190	161	155
AHNAK_GTGATGCTACCCCCAATTTG	484	482	657	424	498	373	380	324	466	83
AHNAK_TGTTAACATTGAAGGACCAG	555	707	625	712	303	416	639	428	396	115
AHRR_AGGAAGGCCGAGTACTCGGT	354	568	305	324	436	456	210	491	279	218
AHRR_CATTTATGACTACATCCACG	340	176	2	44	93	63	3	54	15	83
AHRR_CTGTGCGAATCGGAACTGCA	1262	905	1328	1048	495	597	892	1184	257	660
AHRR_GCTGTCGCTGTTCTGCATTG	757	660	549	746	476	727	509	414	495	395
AHR_ATCGCAAACAAAGCCAACTG	1072	917	489	543	594	828	162	241	1670	2220
AHR_CTTACTTCGGATATGGGACT	1178	1040	509	601	808	675	250	413	679	490
AHR_TACCACATCCACTCTAAGCA	1453	718	294	260	782	746	102	105	311	1095
AHR_TTATAACAGACTACTGTCTG	814	1208	746	880	854	607	602	450	1232	617
AHSA1_CCAGTGCCAGTTGTTGACGT	1146	1042	684	796	595	684	300	467	372	309
AHSA1_TAAGAGTGATCTTACAAGTG	408	356	50	293	338	422	224	253	199	87
AHSA1_TGAGCCTGACACAAATCTCG	885	384	318	194	145	277	114	131	226	126
AHSA1_TTTGTCTGATGAAAACAGCG	1095	1136	386	360	360	330	281	361	320	308
AHSA2_AACGAAAGCTATGGCAACCC	792	656	243	183	221	365	125	170	174	174
AHSA2_CACAAAATTCAGTGCAACCA	753	365	354	307	338	313	274	185	60	272
AHSA2_GGGTGTAAGGATTCCCACTG	213	150	71	12	54	103	57	62	95	139
AHSA2_TAGCATCTTCACTGTAAAGG	477	101	292	37	190	172	29	69	154	64
AHSG_AGACACTGTAAACTCCACAT	370	315	293	207	156	262	123	244	74	61
AHSG_AGATTGATGAAGTAAAGGTG	242	369	178	308	235	105	151	131	130	125
AHSG_GCAACACTCAGTGAGAAGCT	409	646	565	517	333	501	367	471	109	169
AHSG_GTTGTCTATAAATCAGCCCT	305	346	494	215	210	310	314	226	105	168
AHSP_AGAGCCTTGTCTCGCTCTTG	1582	3190	3552	3554	2241	2131	3438	3545	1687	2025
AHSP_CATCAACTATTACAGGCAGC	311	141	149	62	97	189	39	93	53	64
AHSP_GCTGAACTCCTTCAATCCTG	315	156	190	241	76	180	28	73	180	75
AHSP_TGAAGAAGACATGGTGACTG	450	697	679	670	426	401	661	555	292	2382
AICDA_ACCGCAAGGCTGAGCCCGAG	831	1305	1196	1057	572	603	1054	799	405	608
AICDA_CTCACAGAAGTAGAGGCGCG	485	644	577	424	408	492	778	582	185	330
AICDA_TCTCCAGAACGGCTGCCACG	0	0	0	0	0	0	0	0	0	0
AICDA_TGTCGGGCACAGTCGTAGCA	722	979	554	661	521	543	403	643	261	690
AIDA_AGCAAGACATCTACAAAAGG	682	519	175	75	159	224	182	127	88	193
AIDA_GAAGTGCAGCTTTACAGGTA	1069	1078	856	1281	1139	1079	1216	873	722	800
AIDA_GGCGCCGACTTCGACTCTTG	1199	789	455	391	316	556	178	241	170	336
AIDA_TTCCTGCTAGAGTTCCCGGT	735	724	812	531	495	706	581	555	223	263
AIF1L_ATGATCTCAGAGGTGACAGG	373	444	502	268	476	458	380	277	284	132
AIF1L_CAGACCTGATGTCTTTAAAG	175	107	175	148	40	42	229	140	37	121
AIF1L_GAGCTCAGCAACAGGTTCCA	411	489	657	623	309	334	309	391	391	252
AIF1L_GAGGCTGGCCGAGATCAACC	190	312	223	80	133	64	23	126	54	123
AIF1_AAAAGCTTTCGGACTGCTGA	267	595	685	530	369	305	936	655	180	63
AIF1_CAAACTCCATGTATTTCTCT	327	443	255	162	150	253	254	308	193	80
AIF1_TGCTATATTTGGGATCGTCT	777	705	355	274	307	390	321	268	201	222
AIF1_TTTCAGGGACATGATATCTG	918	830	512	430	437	419	535	524	351	120
AIFM1_AGACACTGCGATTCAAACAG	229	204	1	47	76	41	9	1	1	42
AIFM1_ATTGTGGGCTTATCAACAGT	461	357	40	208	364	222	105	80	187	172
AIFM1_GGAATACTCACCAGATAACG	566	660	370	488	363	447	273	550	390	314
AIFM1_TCAATTACGATTATCGGTGG	575	439	341	170	292	405	337	156	176	221
AIFM2_CACTCTCATTCACTCCCAAG	342	160	169	156	194	51	111	160	103	57
AIFM2_CCAGCGCTCACGGTTCATCG	616	697	621	1003	708	313	1080	1340	343	124
AIFM2_TCCGGCAGGGGCTAGTAGTG	147	162	88	218	110	136	125	59	98	55
AIFM2_TGAGCGGGTGAGCAATCTGG	292	302	322	161	135	246	120	246	59	87
AIFM3_AGCACTTGGAGAGATACACT	793	629	500	635	683	406	506	532	314	174
AIFM3_CAGCCCTCAGGATTGCGTGG	995	673	664	615	488	575	677	433	215	203
AIFM3_GCTGGCCCGAGGCCGCAACG	654	625	663	965	593	711	675	1122	418	568
AIFM3_TTTCCGAGCCTATGGCATCG	966	1193	1608	1235	935	956	1287	1116	640	775
AIG1_CCTCACACCAGACCTACGGA	359	459	452	492	203	168	415	340	135	123
AIG1_CCTTTATATTAATCGAGATG	182	322	239	268	85	166	136	239	146	69
AIG1_CGATGGCCTTGTAGTTACAC	665	641	619	473	347	376	404	347	226	335
AIG1_TTCCGTGATTCAGCCACCCT	495	631	379	251	222	379	168	226	290	39
AIM1L_CTGGGATTGGAACTGCAGGG	304	231	209	108	123	226	66	109	164	127
AIM1L_GCCTCGAACTACCCTTATGG	625	225	128	151	291	265	18	129	296	123
AIM1L_GCTTGTCTCTGATCCCACCG	896	743	735	422	485	348	395	291	257	290
AIM1L_GTGTCACTCGGTATTCCTCG	952	1335	577	830	714	706	568	553	325	611
AIM1_AAATGGTCTTCGTGAATAGG	388	591	334	273	233	469	220	175	348	251
AIM1_AGAAACCAAAGTTACCGTCT	352	92	75	142	106	93	129	78	141	113
AIM1_GCCCAGGAACCATTTCGGCG	491	466	110	39	113	117	157	104	142	172
AIM1_GTGTCACAGCCCACGACTGA	406	487	459	355	176	416	629	550	173	191
AIM2_CCTGGATAACATCACTGATG	1003	714	333	584	340	550	442	434	222	321
AIM2_CCTTATCCTACCTTAACATG	722	276	399	311	428	288	147	122	165	226
AIM2_CTTGATGATTCAAAATGCTG	639	443	283	210	222	258	237	228	153	152
AIM2_GCAAGATATTATCGGCACAG	387	265	248	270	256	369	226	284	250	209
AIMP1_AACCAATTCGAAGATCCAGA	328	30	21	29	70	39	41	47	67	8
AIMP1_ACCATAGAATTAGCGTGCAG	937	1185	756	615	421	586	713	583	341	270
AIMP1_GCAGTAACAACCGTATCTTC	457	413	262	184	217	247	235	222	127	69
AIMP1_GCCCCAAGGACAGTTGTCAG	270	262	227	201	174	267	232	75	93	170
AIMP2_CCCCGCCAAGACTATCAGCT	175	109	189	134	110	62	94	110	76	174
AIMP2_GTTGGGGAGCCGGTACATGC	395	43	0	39	119	31	25	23	24	86
AIMP2_TGTAACCAACATAATCCAAG	171	36	19	43	42	117	10	39	16	65
AIMP2_TTCAGCGCCCCGTAATCCTG	410	300	205	229	125	98	143	116	92	112
AIPL1_CGTGTGGTAGGCGAACATGT	271	281	334	170	188	120	138	123	23	38
AIPL1_GGACAGTCATTGACGACAGT	1348	749	617	557	599	621	356	471	307	341
AIPL1_TGCCCCGAGTGATTACCAGA	1000	713	357	370	402	459	800	227	148	131
AIPL1_TTTATCCCCACAGCACACGG	471	243	109	65	83	61	37	116	40	33
AIP_ACGCTGCACAGTGACGACGA	1084	667	699	372	401	407	178	245	426	21
AIP_CAAAAACGTGTGATACAGGA	545	518	554	318	345	281	208	299	230	166
AIP_CAAGAGTCTCCGCAACATCG	1189	741	521	464	458	526	161	217	111	103
AIP_CGTGTGCACCATGCGAGAAG	1176	864	715	680	395	722	197	339	277	225
AIRE_AGTTCGAAGACTCCGGCAGT	321	258	213	121	218	201	118	184	148	22
AIRE_CCCCGCTCACCGTTCCCGAG	845	804	1308	1130	723	932	923	1050	185	283
AIRE_CGCGCTGGCTGACCACGACG	707	403	453	297	316	422	362	388	113	256
AIRE_GTGGCGGTACCAAAGCCTTG	9	0	0	0	0	0	0	0	0	0
AJAP1_AGCCATGTTTCAGCTCGCCG	814	738	815	582	442	795	894	788	384	888
AJAP1_CCATGACGCTGCAGACTAAG	349	205	122	253	145	85	183	167	37	195
AJAP1_CGGTCTCCATCCTACAAACA	537	515	595	472	448	301	337	292	94	191
AJAP1_CTCCTAAAACTCCACAGCCG	446	680	563	283	241	229	563	246	142	84
AJUBA_AAATCGGGGGGCAACGACTG	624	681	723	483	550	516	389	521	349	518
AJUBA_ACCCGACGGCTCAATCCCCG	361	230	86	73	230	82	81	16	113	33
AJUBA_TAGGTCCCCCCAACCCACTT	562	910	741	514	527	467	446	595	275	297
AJUBA_TGGACCGATTGTACGCTCAG	623	830	640	576	329	405	593	421	230	286
AK1_AAGAGTTTGAGCGACGGGTA	828	762	1402	750	565	666	790	788	473	505
AK1_AGTATTGACTTTGGCCACCA	1164	1005	606	386	575	480	307	326	441	239
AK1_GATTGATGGCTACCCGCGGG	277	415	222	374	365	340	245	241	81	192
AK1_GCCCTGAGACCATGACCCAG	710	921	454	636	314	465	302	355	398	263
AK2_AGGCTGATTCACCCCAAGAG	294	489	73	27	144	256	48	72	60	50
AK2_ATGGATGCTGGGAAACTGGT	1330	1474	1280	1064	767	884	1443	1279	578	469
AK2_GTCCCTTTACCGGCCCCGGG	665	1278	666	722	430	564	307	459	274	316
AK2_GTGAGGCAGGCAGAAATGGT	1100	1580	1179	727	882	739	971	941	375	417
AK3_AGAAATTGGCGTGTTAGCCA	755	571	666	646	358	545	693	638	347	378
AK3_ATCCAACAGCCAGCTATACT	295	269	199	329	302	224	69	52	167	231
AK3_GATCTGATAAGCTCTATCTA	615	374	188	476	391	372	153	131	269	251
AK3_TGTAGTGATGCGCGACGACA	1410	1319	1428	1032	677	625	1768	1112	515	313
AK4_ATTCTTACATGTACATGAGG	950	470	315	130	218	289	269	387	143	111
AK4_GAGAACATCAAGGCCAGCAC	1080	541	190	134	384	322	212	103	164	209
AK4_GTGCCCTTGCCCGAGCCGGG	1004	622	687	660	374	639	493	390	389	305
AK4_TCCGAGTTGGAGAACAGGCG	715	1009	920	689	483	687	758	587	225	258
AK5_ACAATGTAAAAGCTACCCAA	325	280	137	56	176	71	45	64	37	18
AK5_ACTCAAACTTTCCATATCGG	317	354	126	192	104	242	113	261	329	62
AK5_CAGGAATACCACCAAATCGG	263	100	111	193	64	186	219	137	35	1
AK5_CCTTCGATGATATTGGACAC	732	673	560	306	372	349	662	584	129	120
AK6_CAGGGAAGAAATCACAACCA	235	13	22	13	143	41	32	0	60	29
AK6_GTGGGTGATTTAGCTCGAGA	420	496	262	390	339	382	82	87	313	128
AK6_TGTACGAAAGACTTGAAACA	469	219	201	203	213	238	46	63	168	141
AK6_TTAGATAACCAAATGAGAGA	317	137	82	19	56	110	35	10	12	37
AK7_AATGGAAGCGCTCTTTGTGA	283	379	301	510	160	271	341	167	105	2
AK7_ACTGCATCACATCCAACTGA	491	220	186	137	239	169	170	194	81	130
AK7_AGCTTCCTCAACCAAAGTGA	355	285	374	314	214	251	166	346	179	51
AK7_CGCTCTACTTACGGGGTCCA	324	275	93	277	204	257	129	242	254	187
AK8_CTGGATGAGCTCGCCAAACG	324	536	235	113	329	299	45	134	144	166
AK8_GTATCATAGGAACATCGTCA	603	290	186	185	115	186	71	119	82	18
AK8_TGAACGGGGCATTAGTACGA	249	182	134	118	185	262	40	57	92	117
AK8_TTCGGGTGGCCAGTCAAAGG	266	221	196	184	111	246	121	66	71	109
AK9_ACATATACAGTAGAGACCAG	768	585	710	336	494	376	378	472	246	325
AK9_AGGCATCTCACGATACCCGA	586	462	278	184	167	141	160	184	42	55
AK9_TACTGCATGGGAGTTAACTG	1063	932	1091	870	675	564	818	694	326	657
AK9_TCACGGGCTTTATCAAAACG	465	799	995	759	450	533	1232	957	531	329
AKAP10_ACTGGCTACTGTAAGTGTAG	812	889	413	834	551	647	411	533	413	488
AKAP10_CAGATTGAAGTGCTGACCAG	1106	1088	915	782	469	733	408	506	754	307
AKAP10_GGGCCAATATGATGGACAGG	918	648	997	655	712	579	579	957	273	402
AKAP10_TTGTTTATGACTCATTCAGA	802	708	250	287	405	626	267	132	152	195
AKAP11_AAGTGTAGTGCCATCGACAC	323	359	341	140	332	139	126	230	38	24
AKAP11_AATATTAACAGTATTAAACA	367	215	67	195	121	161	78	100	97	44
AKAP11_AGATGGCAGTGTCTCTAGGG	202	109	286	209	172	83	208	340	59	143
AKAP11_TACTGGTATAAGGTACACCT	349	102	354	61	139	171	144	126	139	3
AKAP12_CTGGGGGAGAAATTTCTGCG	133	237	239	382	189	210	214	232	98	34
AKAP12_GTGCTGTCCAAACCCCCCGA	507	736	453	464	339	416	578	440	214	161
AKAP12_TCATATTCAGCTGATAACCG	370	351	237	126	105	223	207	73	104	56
AKAP12_TGAAGCCGCACTGTTAACTG	454	477	328	394	258	438	192	96	78	132
AKAP13_AGAGAGTGTACCTCAAAACA	587	536	543	486	428	501	291	307	135	250
AKAP13_ATTCGAATGAGCCTGATACG	435	741	794	544	477	633	390	483	215	250
AKAP13_CAGACACCCATTCAGTGGTG	1047	1653	1515	991	855	1150	920	823	665	448
AKAP13_TGTGACGGTGGATGTTACAG	542	911	902	736	456	528	657	765	458	118
AKAP14_ATGGCGTAGAGTTTGTAGAG	684	876	399	417	277	432	294	343	287	233
AKAP14_CAGAGATTCGTGCTACGGGT	903	1244	544	515	606	505	395	397	513	278
AKAP14_GACTCACGGTGAATTCACTG	1313	826	774	653	360	696	251	310	480	386
AKAP14_TATGCTGTTAAGATTGTGGA	1082	1095	672	607	570	491	506	447	401	321
AKAP17A_ACATGAACGAGACCCTGCCG	1499	1778	1475	1247	1223	1183	1524	1059	907	533
AKAP17A_GCTCTTGGAAATACGCAGCG	855	893	853	763	612	642	677	542	315	466
AKAP17A_GTACTCGCGGTACTGCACAT	1556	763	807	772	533	788	775	813	424	462
AKAP17A_GTGATGCCTCAATTAAGAAG	758	589	208	378	200	370	114	163	176	68
AKAP1_ACAGACATGAGATTGCGACC	562	514	534	477	363	267	494	422	109	382
AKAP1_GCTTCTCTGCGGGGACTACG	660	531	570	729	496	332	1066	897	197	360
AKAP1_GTCCGGCAACTCTTCACTGG	319	168	149	90	130	260	138	174	237	212
AKAP1_TGCAACCTTGCCAACCGTGG	619	399	388	299	432	365	169	183	130	123
AKAP2_ACAGCGAGCCTTCTAAACGT	508	259	243	204	345	310	282	147	150	74
AKAP2_AGAGATCCGCTATCTAGATG	409	432	609	414	394	478	516	658	157	328
AKAP2_CCTATCCAATGATTTCAGCA	475	227	260	72	307	204	91	111	179	82
[truncated: 75,442 more rows]

## Sheet: Culmulative RC frequency
sgRNA	Brunello Library	D0	C1D7	C2D7	P1D7	P2D7	C1D14	C2D14	P1D14	P2D14	Average Read count	% of libray	Rank
AICDA_TCTCCAGAACGGCTGCCACG	0	0	0	0	0	0	0	0	0	0	0	0.00129131	1
AVL9_TCTCCAGTGAATAAATTGGT	0	0	0	0	0	0	0	0	0	0	0	0.00258261	2
DDX3X_TCTCGGTTCCTTAAATGAGG	0	0	0	0	0	0	0	0	0	0	0	0.00387392	3
FAM83H_TCTCGGGTAACATACTGCGG	0	0	0	0	0	0	0	0	0	0	0	0.00516522	4
GTF2F2_TCTCCTTTAGGACTCAAGGA	0	0	0	0	0	0	0	0	0	0	0	0.00645653	5
H3F3A_TCTCGCACCAGACGCTGGAA	0	0	0	0	0	0	0	0	0	0	0	0.00774783	6
HSP90B1_TCTCGCGGGAAACATTCAAG	0	0	0	0	0	0	0	0	0	0	0	0.00903914	7
PCBP3_TCTCACCTTAGAGTGGTGCA	0	0	0	0	0	0	0	0	0	0	0	0.0103304	8
PCNXL4_TCTCCAGTACAGACATATGG	0	0	0	0	0	0	0	0	0	0	0	0.0116218	9
PYGB_TCTCGAAACAGGTTCTCACA	0	0	0	0	0	0	0	0	0	0	0	0.0129131	10
SFXN2_TCTCCTACCTGACTGATGTG	0	0	0	0	0	0	0	0	0	0	0	0.0142044	11
SIRT5_TCTCACACTCGGCTATGGCG	0	0	0	0	0	0	0	0	0	0	0	0.0154957	12
SSPN_TCTCATATCAGGTTGACGAA	0	0	0	0	0	0	0	0	0	0	0	0.016787	13
SYT8_AGACGCTGACCCGGGCATAG	0	0	0	0	0	0	0	0	0	0	0	0.0180783	14
TMED7_TCTCACTAGGAAACAAAGGT	0	0	0	0	0	0	0	0	0	0	0	0.0193696	15
ZNF260_TCTCATGAATGCACTGAATG	0	0	0	0	0	0	0	0	0	0	0	0.0206609	16
CBWD3_TCTCATTAATAAAACAGACT	1	0	0	0	0	0	0	0	0	0	0.1	0.0219522	17
CLSTN1_TCTCCTCAGAAGGATCCTGA	1	0	0	0	0	0	0	0	0	0	0.1	0.0232435	18
ICA1_TCTCAAGAAGAAAACGAACT	1	0	0	0	0	0	0	0	0	0	0.1	0.0245348	19
KXD1_TCTCTACTAGGGTCCTCGTG	1	0	0	0	0	0	0	0	0	0	0.1	0.0258261	20
LSM1_TCTCTCCCCAGAAAAGCACT	1	0	0	0	0	0	0	0	0	0	0.1	0.0271174	21
OR4F29_TCTCCACACCACCAACGACG	1	0	0	0	0	0	0	0	0	0	0.1	0.0284087	22
PAFAH1B2_TCTCCCACGAACAGTACATC	1	0	0	0	0	0	0	0	0	0	0.1	0.0297	23
TM6SF1_GATGGTGGCAGCCATAGCAT	1	0	0	0	0	0	0	0	0	0	0.1	0.0309913	24
TULP2_TCTCCGAGAATCCGACGCAA	1	0	0	0	0	0	0	0	0	0	0.1	0.0322826	25
TXNRD1_TCTCTGTTTCACAAACACAA	1	0	0	0	0	0	0	0	0	0	0.1	0.0335739	26
USP24_TCTCCAACTAGTATTATGAG	1	0	0	0	0	0	0	0	0	0	0.1	0.0348653	27
DFNB31_TCTCAACATCCTACACGACG	2	0	0	0	0	0	0	0	0	0	0.2	0.0361566	28
FAM49B_TCTCGCTCTAGATGCTGGGT	2	0	0	0	0	0	0	0	0	0	0.2	0.0374479	29
GEN1_TCTCCATAAAGGTTCACCTA	2	0	0	0	0	0	0	0	0	0	0.2	0.0387392	30
NCF1_TCTCGTAGTTGGCAATGGCG	2	0	0	0	0	0	0	0	0	0	0.2	0.0400305	31
TSTD1_TCTCAGCAGAATATAAAGCC	2	0	0	0	0	0	0	0	0	0	0.2	0.0413218	32
TTC34_TCTCCACACAGGGTCGCCTG	2	0	0	0	0	0	0	0	0	0	0.2	0.0426131	33
ARHGEF16_AGACGCTGGGGAGGAAACGT	3	0	0	0	0	0	0	0	0	0	0.3	0.0439044	34
C17orf49_AGACGGAAATAGAGATGCTG	3	0	0	0	0	0	0	0	0	0	0.3	0.0451957	35
C1orf95_TCTCACAGGGACATTCGTCT	3	0	0	0	0	0	0	0	0	0	0.3	0.046487	36
CBWD1_TCTCATTAATAAAACAGACC	3	0	0	0	0	0	0	0	0	0	0.3	0.0477783	37
COQ10A_TCTCACCTCATTGGTCGCGG	3	0	0	0	0	0	0	0	0	0	0.3	0.0490696	38
ESCO1_TCTCTTCTAGTAGTCTTCTG	3	0	0	0	0	0	0	0	0	0	0.3	0.0503609	39
FABP7_TCTCAGCACATTCAAGAACA	3	0	0	0	0	0	0	0	0	0	0.3	0.0516522	40
FLOT1_AGACGTTAGAGGGCCACCAG	3	0	0	0	0	0	0	0	0	0	0.3	0.0529435	41
LHX1_TCTCCGCACCAGGTCGCTAG	3	0	0	0	0	0	0	0	0	0	0.3	0.0542348	42
NKX2-4_TCTCACTTGACGAGTAGCGT	3	0	0	0	0	0	0	0	0	0	0.3	0.0555261	43
PPFIBP1_TCTCGAGACCAACCTAATCG	3	0	0	0	0	0	0	0	0	0	0.3	0.0568174	44
SPINK7_TCTCCTTCTGCTCTGTACAG	3	0	0	0	0	0	0	0	0	0	0.3	0.0581088	45
IGSF10_TCTCACCTATAGGATAACTG	4	0	0	0	0	0	0	0	0	0	0.4	0.0594001	46
PIK3AP1_TCTCACAATAACATAGACAG	4	0	0	0	0	0	0	0	0	0	0.4	0.0606914	47
SAV1_TCTCTTCTCATTATTTCATG	4	0	0	0	0	0	0	0	0	0	0.4	0.0619827	48
SCCPDH_TCTCCATAAAACCGATACTA	4	0	0	0	0	0	0	0	0	0	0.4	0.063274	49
ADGRD1_TCTCTTCCCAAGGATCGCGG	5	0	0	0	0	0	0	0	0	0	0.5	0.0645653	50
EFCAB1_TCTCTCCCTTTAGTATTCCG	5	0	0	0	0	0	0	0	0	0	0.5	0.0658566	51
HDGF_TCTCCTTGGATTCCTCGTAA	5	0	0	0	0	0	0	0	0	0	0.5	0.0671479	52
HIST2H3D_CCGCTACCGGCCCGGCACCG	5	0	0	0	0	0	0	0	0	0	0.5	0.0684392	53
NPY2R_TCTCAATCAGCGAATACTCC	5	0	0	0	0	0	0	0	0	0	0.5	0.0697305	54
OSBPL9_TCTCAGCCTTTCATGCGGGA	5	0	0	0	0	0	0	0	0	0	0.5	0.0710218	55
PHC2_TCTCTCTCATTAGATCAACC	5	0	0	0	0	0	0	0	0	0	0.5	0.0723131	56
PPRC1_TCTCGCGGGCAGTCTACTGT	5	0	0	0	0	0	0	0	0	0	0.5	0.0736044	57
VPREB3_TCTCCTCTACTACCGCTCGG	5	0	0	0	0	0	0	0	0	0	0.5	0.0748957	58
ZNF728_TCTCTTATAAGTAAGGGCTG	4	0	0	0	0	0	1	0	0	0	0.5	0.076187	59
ADCY3_TCTCTTCTAGGTAATCACAG	6	0	0	0	0	0	0	0	0	0	0.6	0.0774783	60
C11orf31_AGACGCGTCAGCTAGTGCTA	6	0	0	0	0	0	0	0	0	0	0.6	0.0787696	61
CAPN9_AGACGCGATCCACAAATGGG	5	0	0	0	0	1	0	0	0	0	0.6	0.0800609	62
NDST1_TCTCTGTGCGGTATTTGAAG	6	0	0	0	0	0	0	0	0	0	0.6	0.0813523	63
OTOP3_TCTCCGGAAAGCTTCACACG	6	0	0	0	0	0	0	0	0	0	0.6	0.0826436	64
ZNF670_TCTCCAGTGTAAGTGCTCTG	0	0	0	0	0	6	0	0	0	0	0.6	0.0839349	65
CCRL2_TCTCATTGGACTGTACTTCG	7	0	0	0	0	0	0	0	0	0	0.7	0.0852262	66
IMPDH1_TCTCACAGGACTCGTCCCAA	7	0	0	0	0	0	0	0	0	0	0.7	0.0865175	67
KCNIP1_TCTCAATAAAATCGACAGAG	7	0	0	0	0	0	0	0	0	0	0.7	0.0878088	68
KIF24_TCTCCCAAAAAAGTCAAGCT	7	0	0	0	0	0	0	0	0	0	0.7	0.0891001	69
KXD1_TCTCATTGGTCTTCTCAAAG	6	0	0	0	0	0	0	0	1	0	0.7	0.0903914	70
PAPSS1_TCTCATAAAGCCATTCAATG	7	0	0	0	0	0	0	0	0	0	0.7	0.0916827	71
TCTN3_TCTCTCACCAGTCCTAGAAG	7	0	0	0	0	0	0	0	0	0	0.7	0.092974	72
XPO1_TCTCAGGGAAACTCTTATGG	7	0	0	0	0	0	0	0	0	0	0.7	0.0942653	73
C3orf62_TCTCATTCTCAGGAGCACAT	8	0	0	0	0	0	0	0	0	0	0.8	0.0955566	74
FAT4_AGACGGGACTTATCACGGTG	8	0	0	0	0	0	0	0	0	0	0.8	0.0968479	75
LAMA1_TCTCGACATTCGTTGCACTG	8	0	0	0	0	0	0	0	0	0	0.8	0.0981392	76
PRY_TCTCCATTCTAGATATGGGA	8	0	0	0	0	0	0	0	0	0	0.8	0.0994305	77
ZNF19_TCTCTGATGTATAACAAACT	8	0	0	0	0	0	0	0	0	0	0.8	0.100722	78
AIRE_GTGGCGGTACCAAAGCCTTG	9	0	0	0	0	0	0	0	0	0	0.9	0.102013	79
BANP_AGACGTGCAACAAAGTGCGA	9	0	0	0	0	0	0	0	0	0	0.9	0.103304	80
CKMT1A_TCTCATCAAAGTAGCCAGAA	9	0	0	0	0	0	0	0	0	0	0.9	0.104596	81
Control_GAAAACACGATGACGTCTCT	1	6	0	0	0	0	0	2	0	0	0.9	0.105887	82
LIPI_TCTCACCCAGAAATGTCCTG	8	0	0	0	0	1	0	0	0	0	0.9	0.107178	83
MYEOV2_GGTGGACGAGATGTTCCCCG	9	0	0	0	0	0	0	0	0	0	0.9	0.10847	84
UBE2M_TCTCTGTCCACAGAGAGGAC	9	0	0	0	0	0	0	0	0	0	0.9	0.109761	85
A1BG_TCTCCATGGTGCATCAGCAC	10	0	0	0	0	0	0	0	0	0	1	0.111052	86
ALDH3A2_TCTCCCTCAGTATTTAGACC	10	0	0	0	0	0	0	0	0	0	1	0.112344	87
CLASP2_TCTCTTACCTAGTGACGCAT	10	0	0	0	0	0	0	0	0	0	1	0.113635	88
FAAH_TCTCATAGTACCCCACACGC	10	0	0	0	0	0	0	0	0	0	1	0.114926	89
POLRMT_TCTCCAGTATCTTTGCCCAG	10	0	0	0	0	0	0	0	0	0	1	0.116218	90
DTD1_TCTCATCCTCAAATACACGC	11	0	0	0	0	0	0	0	0	0	1.1	0.117509	91
ERN1_TCTCCCTCAATGGTACACGA	11	0	0	0	0	0	0	0	0	0	1.1	0.1188	92
PGM3_CACGGGTGGCCGATATGGAA	10	0	0	1	0	0	0	0	0	0	1.1	0.120091	93
TEX264_TCTCACCATAGAGCCCCATG	10	0	0	0	0	0	1	0	0	0	1.1	0.121383	94
CTSC_TCTCCTAATCATATCTCCCA	12	0	0	0	0	0	0	0	0	0	1.2	0.122674	95
MAFF_TCTCCGCCGAGGAGGTGACA	12	0	0	0	0	0	0	0	0	0	1.2	0.123965	96
OR4F21_TCTCCACACCACCAATGACG	12	0	0	0	0	0	0	0	0	0	1.2	0.125257	97
PHYH_TCTCATCGTTTGCGCCTGGA	12	0	0	0	0	0	0	0	0	0	1.2	0.126548	98
RAE1_TCTCCCCTCGATACTTCCCA	12	0	0	0	0	0	0	0	0	0	1.2	0.127839	99
SUPT4H1_AGACGGTGCCGAAGGACCTG	11	0	0	0	1	0	0	0	0	0	1.2	0.129131	100
ART1_TCTCCCGGATCTCAACCACA	13	0	0	0	0	0	0	0	0	0	1.3	0.130422	101
CAPN14_AGACGGTCATCGATCACCAC	13	0	0	0	0	0	0	0	0	0	1.3	0.131713	102
CCDC53_TCTCAGTTGTCATCTATCCC	8	5	0	0	0	0	0	0	0	0	1.3	0.133004	103
DDX58_TCTCAACAATCTGTTCCACT	12	0	0	0	0	0	0	1	0	0	1.3	0.134296	104
DMBX1_TCTCACGCATCACCACATCT	12	0	1	0	0	0	0	0	0	0	1.3	0.135587	105
FOXN2_TCTCCCTCTATGTCATACAA	13	0	0	0	0	0	0	0	0	0	1.3	0.136878	106
GPHA2_AGACGGAGGTGATGTTGTGT	13	0	0	0	0	0	0	0	0	0	1.3	0.13817	107
IRF1_TCTCCCTCGACAGTCATGTG	13	0	0	0	0	0	0	0	0	0	1.3	0.139461	108
KCNA10_TCTCATCACAGAGCTAGTCC	6	0	0	0	0	0	0	7	0	0	1.3	0.140752	109
MAP3K12_TCTCGAAGTACACACTGGGT	13	0	0	0	0	0	0	0	0	0	1.3	0.142044	110
MS4A6A_TCTCTTACTCACCAAAAGCT	12	0	0	0	1	0	0	0	0	0	1.3	0.143335	111
PRB1_TCTCCTCCAGGAAAACCACA	13	0	0	0	0	0	0	0	0	0	1.3	0.144626	112
TM7SF3_AGACGTACCTCGCATAGCCT	13	0	0	0	0	0	0	0	0	0	1.3	0.145918	113
TNNT2_TCTCTCAAAGACAGGATCGT	12	0	0	0	0	0	0	0	0	1	1.3	0.147209	114
TRA2A_TCTCTGTTGTGTACAAACTG	13	0	0	0	0	0	0	0	0	0	1.3	0.1485	115
DGCR2_TCTCCCCGCTCAGGTAGACC	13	0	0	0	0	0	0	1	0	0	1.4	0.149791	116
FAXDC2_TCTCGCTACCGAATTCAGGT	13	1	0	0	0	0	0	0	0	0	1.4	0.151083	117
TSPYL2_TCTCTCAGGTAGTAGCGTAG	14	0	0	0	0	0	0	0	0	0	1.4	0.152374	118
UBXN10_GCTCTTTACCAAGACGAGAC	14	0	0	0	0	0	0	0	0	0	1.4	0.153665	119
GALNT10_TCTCGTACCGAAAGTCGTCA	1	0	14	0	0	0	0	0	0	0	1.5	0.154957	120
PSMB10_TCTCCTTCGAGAACTGCCAA	15	0	0	0	0	0	0	0	0	0	1.5	0.156248	121
TUBGCP6_TCTCGAACCTGTCACCACAA	11	4	0	0	0	0	0	0	0	0	1.5	0.157539	122
TYMP_TCTCAGTAAGAAACTCGTGG	14	0	0	1	0	0	0	0	0	0	1.5	0.158831	123
KAT7_TCTCATCGTGAGATACATTG	16	0	0	0	0	0	0	0	0	0	1.6	0.160122	124
PCDHB4_TCTCACTCGAAATCATAGTG	14	0	2	0	0	0	0	0	0	0	1.6	0.161413	125
PMP22_TCTCTCTAGCAATGGATCGT	15	0	0	0	0	0	0	0	1	0	1.6	0.162705	126
ZDHHC23_TCTCAACAATCGCACAACAA	16	0	0	0	0	0	0	0	0	0	1.6	0.163996	127
POC1B_TCTCACGGTTCTGTCTCGTG	17	0	0	0	0	0	0	0	0	0	1.7	0.165287	128
BFSP1_TCTCGATGATACGATGATAC	5	0	0	0	13	0	0	0	0	0	1.8	0.166578	129
NALCN_TCTCGCCCGACAATGAACAG	18	0	0	0	0	0	0	0	0	0	1.8	0.16787	130
CYP26C1_GAGGCGTCGTAGACTGAGAC	6	0	0	0	0	13	0	0	0	0	1.9	0.169161	131
GDF2_TCTCCAATGACCACAGCAGT	19	0	0	0	0	0	0	0	0	0	1.9	0.170452	132
PHACTR1_AGACGAGCTCAACAAAACGC	19	0	0	0	0	0	0	0	0	0	1.9	0.171744	133
URM1_TCTCCCTGGATGAACAACTC	1	18	0	0	0	0	0	0	0	0	1.9	0.173035	134
SNRPA1_TCTCACCAATAATAGTCTCG	7	0	0	0	0	0	0	13	0	0	2	0.174326	135
Control_CCTTGGCGAGACGGAGGTAC	10	0	4	7	0	0	0	0	0	0	2.1	0.175618	136
AKT2_TCTCGTCTGGAGAATCCACG	22	0	0	0	0	0	0	0	0	0	2.2	0.176909	137
FRS2_TCTCCAAATGAGGGATATCG	21	0	0	0	0	0	0	1	0	0	2.2	0.1782	138
MED12_GTGGCGTACTGCACGTGTCG	15	0	0	7	0	0	0	0	0	0	2.2	0.179491	139
ABCB5_AGACGTGGATAGAGTCACTA	23	0	0	0	0	0	0	0	0	0	2.3	0.180783	140
CABP1_TCTCAGCGAAGCCCTTGCGC	23	0	0	0	0	0	0	0	0	0	2.3	0.182074	141
RNF39_TCTCCCTGAAGATTATCCAG	22	0	0	0	0	0	0	0	0	1	2.3	0.183365	142
SCEL_TCTCTTCAGAGCAAATCCAA	11	0	0	0	9	0	0	0	3	0	2.3	0.184657	143
UBXN8_TCTCCCCAAGTTTATCTGAA	14	8	0	1	0	0	0	0	0	0	2.3	0.185948	144
GPN3_TCTCTGCGATTCGGTCCCAA	14	9	0	0	0	0	0	0	1	0	2.4	0.187239	145
MARCH6_TCTCAGTAGTAGAATGAAGG	23	0	0	1	0	0	0	0	0	0	2.4	0.188531	146
RGMA_TCTCGTAATGGCAGATCTCG	16	0	0	0	8	0	0	0	0	0	2.4	0.189822	147
BPIFB1_GGCTGGTGGCACAGTCACTG	25	0	0	0	0	0	0	0	0	0	2.5	0.191113	148
LOC100130357_TCTCCCGCTTCTCCACTCCG	25	0	0	0	0	0	0	0	0	0	2.5	0.192405	149
ATP6V0D1_TCTCGATGTTCATCTCGTCA	26	0	0	0	0	0	0	0	0	0	2.6	0.193696	150
CHRNG_TCTCGGTCATGGATAGCTGG	24	0	1	0	0	0	0	1	0	0	2.6	0.194987	151
DEFB133_TCTCATGATAAAGCAACTAT	7	0	0	19	0	0	1	0	0	0	2.7	0.196278	152
FBN2_TCTCGGTGTAGATATTCGCA	4	15	0	8	0	0	0	0	0	0	2.7	0.19757	153
GPR37L1_TCTCGGTCACCGGATACAGG	22	0	0	0	5	0	0	0	0	0	2.7	0.198861	154
HOXD10_TCTCAACGGGACAAGACTCA	26	1	0	0	0	0	0	0	0	0	2.7	0.200152	155
TMEM182_TCTCCGTACCCCTTCATGAG	22	0	0	0	0	0	0	0	5	0	2.7	0.201444	156
ARMCX1_AGACGAGAACGAGAAAATCT	28	0	0	0	0	0	0	0	0	0	2.8	0.202735	157
ATP8B4_TCTCTTCTGACATTACAGTG	16	0	0	5	0	0	7	0	0	0	2.8	0.204026	158
DEFB4A_TCTCACCTGGAAGAGGCATC	19	0	0	1	0	0	8	0	0	0	2.8	0.205318	159
DOCK10_TCTCCTTACCCGAACAGTAA	28	0	0	0	0	0	0	0	0	0	2.8	0.206609	160
SPRY1_TCTCATAGTCTAATCTCTGA	28	0	0	0	0	0	0	0	0	0	2.8	0.2079	161
TMEM150A_TCTCCACAGGGCATACATGG	27	0	0	0	0	0	0	0	0	1	2.8	0.209192	162
WARS_TCTCTGACCTGGACTACATG	28	0	0	0	0	0	0	0	0	0	2.8	0.210483	163
HIVEP3_GTGGCGAGATGTACCCACAT	18	11	0	0	0	0	0	0	0	0	2.9	0.211774	164
DDX11_TCTCCACTGATGCACATCCA	30	0	0	0	0	0	0	0	0	0	3	0.213065	165
CAV2_TCTCGGGGTCGGCGTACTCG	32	0	0	0	0	0	0	0	0	0	3.2	0.214357	166
CHMP2A_TCTCTAGTTTCTGTCGCTCG	14	18	0	0	0	0	0	0	0	0	3.2	0.215648	167
ERMAP_TCTCTATGAACATGTGACGG	14	1	0	0	17	0	0	0	0	0	3.2	0.216939	168
FGF23_TCTCCGGGTCGAAATAGTGC	19	0	1	12	0	0	0	0	0	0	3.2	0.218231	169
GP1BA_TCTCACAGTTGCATAACCAG	21	11	0	0	0	0	0	0	0	0	3.2	0.219522	170
PITPNB_GAAGCTAGTAAGAATGAGAC	32	0	0	0	0	0	0	0	0	0	3.2	0.220813	171
TMEM133_TCTGCGAATCAACAGGAGAC	21	0	0	0	0	0	0	0	11	0	3.2	0.222105	172
NPAS4_TCTCCAAGCAGAACTAAGCA	22	0	0	0	0	11	0	0	0	0	3.3	0.223396	173
PIF1_TCTCGTCAATGACCAACCGC	27	0	0	0	0	6	0	0	0	0	3.3	0.224687	174
DNAJC25-GNG10_TCTCCGCCTTGCCCGCCGAG	33	0	0	0	1	0	0	0	0	0	3.4	0.225978	175
RNF10_TCTCTGGCCACGTTAGACTC	33	0	0	1	0	0	0	0	0	0	3.4	0.22727	176
RPL14_TTGCACTCAAGTGAGGAGAC	33	1	0	0	0	0	0	0	0	0	3.4	0.228561	177
MAD2L2_AGACGAATTTCTCCACTGGG	20	5	0	0	0	9	0	0	1	0	3.5	0.229852	178
MDP1_AGACGTCCGACTGTACCCAG	20	0	0	0	0	0	0	0	15	0	3.5	0.231144	179
OR10V1_TCTCATCATTGTGGCAGAAT	7	0	18	0	10	0	0	0	0	0	3.5	0.232435	180
GUK1_TCTCTCTGCTAGATACCACG	36	0	0	0	0	0	0	0	0	0	3.6	0.233726	181
MTBP_TCTCTTTCTAGGTAGAGCAA	26	3	0	0	7	0	0	0	0	0	3.6	0.235018	182
ZNF157_AGACGTAAAAGAACACCCAG	36	0	0	0	0	0	0	0	0	0	3.6	0.236309	183
MTMR12_TCTCCGCCAGAACGACAAAG	20	6	0	11	0	0	0	0	0	0	3.7	0.2376	184
ZMYND11_TCTCTTTAGGGTGCATACCG	32	0	0	0	0	0	0	4	1	0	3.7	0.238892	185
ANXA2R_TCTCCTAGTACTGGATACAA	29	0	0	0	0	0	0	0	9	0	3.8	0.240183	186
BRMS1_TCTCACTGACACACTCGCTG	37	0	0	0	0	0	0	0	0	1	3.8	0.241474	187
CX3CL1_AGACGGAGCATTCTCCTCTG	2	0	0	0	0	0	0	0	36	0	3.8	0.242765	188
EFNB2_AGACGTCCAGAACTAGAAGC	14	0	0	0	23	0	0	1	0	0	3.8	0.244057	189
GOLGA8H_TCTCATTACAGAAAAGTCCA	24	0	0	0	0	0	0	0	0	14	3.8	0.245348	190
INHBC_TCTCACTTTCAAGGTCCAAG	18	21	0	0	0	0	0	0	0	0	3.9	0.246639	191
KRT6A_AGACGCTGCTGAAGCCAGAG	13	0	0	0	9	17	0	0	0	0	3.9	0.247931	192
PLEKHF2_TCTCCAATAAGAACTCGTCC	39	0	0	0	0	0	0	0	0	0	3.9	0.249222	193
ARHGEF17_AGACGGAGGCGTCTTACCCG	14	25	0	0	0	0	0	0	0	1	4	0.250513	194
BCL9_TCTCTGATCAAAGGAGTCGG	21	8	0	0	0	11	0	0	0	0	4	0.251805	195
CYBB_TCTCACCTTTCATAAAATGG	21	0	0	0	9	0	0	0	0	10	4	0.253096	196
GOLGA8M_TCTCACTACAGAAAAGTCCA	40	0	0	0	0	0	0	0	0	0	4	0.254387	197
S100A8_AGACGTCTGGTTCAAAGAGT	6	0	0	0	0	34	0	0	0	0	4	0.255679	198
SPATA31C1_TCTCCCAGTGTCCAACAGGG	40	0	0	0	0	0	0	0	0	0	4	0.25697	199
ZNF282_TCTCCGTCCATTGAGTCGCG	6	0	0	0	32	1	0	0	0	1	4	0.258261	200
GAS6_TCTCCGTACACCAAAAACTC	23	0	0	0	0	17	0	0	0	1	4.1	0.259552	201
LAMA2_TCTCAGGCGAATATAGCGAG	10	1	0	11	9	0	0	9	0	1	4.1	0.260844	202
SDR39U1_CGGGCCCGGCCGGATCACGT	24	0	0	0	0	0	0	0	9	8	4.1	0.262135	203
SHMT1_TCTCCCACAGATACTATGGC	7	18	1	0	15	0	0	0	0	0	4.1	0.263426	204
ZNF548_TCTCTGATGTCTAACAAATG	29	12	0	0	0	0	0	0	0	0	4.1	0.264718	205
C12orf77_AGACGCTGGACAGCATACGA	9	12	0	0	21	0	0	0	0	0	4.2	0.266009	206
ALG2_TCTCCATCAACAGATACGAA	25	18	0	0	0	0	0	0	0	0	4.3	0.2673	207
AQP2_TCTCCGAGCCGCCTTCTACG	28	0	0	0	8	0	7	0	0	0	4.3	0.268592	208
COA3_TCTCCACGCTTAGAATCCAG	20	0	0	0	0	0	0	0	0	23	4.3	0.269883	209
DPYD_TCTCCATTGCCATCGATACG	11	0	20	0	0	0	0	0	0	12	4.3	0.271174	210
FGFR4_TGGTGGCCACTGGTACAAGG	26	0	0	0	17	0	0	0	0	0	4.3	0.272465	211
OSER1_TCTCGATGCTAATCACACAG	37	0	0	0	5	0	1	0	0	0	4.3	0.273757	212
RPL23_TCTCTCAGTACATCCAGCAG	40	0	0	0	0	1	0	0	2	0	4.3	0.275048	213
KIR2DL3_TCTCTCCTGCCAGAACCGTG	7	0	0	0	37	0	0	0	0	0	4.4	0.276339	214
PAG1_TCTCGTCCAGAAGCTTAACA	15	12	0	0	0	17	0	1	0	0	4.5	0.277631	215
HTR1F_TCTCAGCTATAGCTTTGGAT	36	0	0	0	0	11	0	0	0	0	4.7	0.278922	216
SCT_GGGCCCGGCGACACTCAGAC	33	0	0	4	0	0	0	10	0	0	4.7	0.280213	217
TUBAL3_TCTCGGATAAGGTACCAGGT	1	1	1	33	0	0	0	11	0	0	4.7	0.281505	218
CDK9_TCTCCCGCAAGGCTGTAATG	14	34	0	0	0	0	0	0	0	0	4.8	0.282796	219
PDYN_TCTCCCAAGTATCTCAACAA	17	0	0	2	29	0	0	0	0	0	4.8	0.284087	220
BCLAF1_AGACGACCTTATGGGTACAG	22	26	0	0	0	0	0	1	0	0	4.9	0.285379	221
LRIT3_CAGGAAATCTGGTGGCAATG	28	13	0	0	0	9	0	0	0	0	5	0.28667	222
PTCHD4_AGACGTAGAATCCTATCACA	11	0	0	0	17	0	9	15	0	0	5.2	0.287961	223
TBC1D29_TCTCCGGGTGCTGAATGATG	17	12	0	0	20	0	0	1	2	0	5.2	0.289252	224
SLC22A7_TCTCCCCAACACCACGTTGG	23	0	0	0	7	23	0	0	0	0	5.3	0.290544	225
SEH1L_TCTCTTTCGACTTCCACGGG	23	10	0	0	0	20	1	0	0	0	5.4	0.291835	226
CDH8_AGACGATGGGAAGATAACGC	9	0	20	0	8	0	1	18	0	0	5.6	0.293126	227
OR52N1_GGATGGTGGCATAACGCAGA	30	0	0	0	0	0	0	0	26	0	5.6	0.294418	228
WDR48_TCTCAGTAGACTTAAAAACA	33	0	0	0	0	23	1	0	0	0	5.7	0.295709	229
XKRY_TCTCATGATATGGCATTCGT	25	0	0	31	0	0	0	1	0	0	5.7	0.297	230
TKTL2_TCTCATACCAAAATCGCCTG	11	0	0	0	19	0	0	0	0	28	5.8	0.298292	231
PMF1_TCTCTGACATCAAAGAGGAG	11	1	0	0	0	48	0	0	0	0	6	0.299583	232
SPOCK1_TCTCTGAAGGGTCAAGCAGG	18	0	8	0	0	22	11	1	0	0	6	0.300874	233
MYH11_TCTCGCCCAACCTTGATACG	15	0	1	21	0	0	0	11	12	2	6.2	0.302166	234
NOTCH2NL_TCTCGACCTTGCCTGAATGG	30	0	0	0	31	0	1	0	0	0	6.2	0.303457	235
ST6GALNAC6_CACACACTGGTGGCACCGAG	31	0	20	3	7	1	0	0	0	0	6.2	0.304748	236
UBE2A_TCTCTTACCATCCTCAAACG	24	0	0	0	0	15	14	0	0	9	6.2	0.306039	237
COX18_TCTCCGGAATTTAAGCACGG	12	51	0	0	0	0	0	0	0	0	6.3	0.307331	238
LOC388849_TCTCCTTCCTGGCTCGAGTG	11	0	27	0	0	25	0	0	0	0	6.3	0.308622	239
LTC4S_AGACGCGCTCGAACTCGGGT	17	46	0	0	0	0	0	0	0	0	6.3	0.309913	240
HGC6.3_TCTCCTCCCCCAACACTGCA	9	0	0	0	0	0	30	25	0	0	6.4	0.311205	241
CDNF_TCTCACCCGGTGCTGACGCA	18	19	1	10	0	0	9	7	0	1	6.5	0.312496	242
FOXD4L3_AGACGAGGTGGAAGACGAGG	38	0	0	0	0	26	0	1	0	0	6.5	0.313787	243
USP42_TCTCATTTATAGGCTAGCAA	9	54	1	0	0	0	0	0	1	0	6.5	0.315079	244
Control_GGGACATCCTTGCCGTCTCA	17	2	12	0	0	1	0	12	0	22	6.6	0.31637	245
FOXJ2_TCTCAACAAGTGTTTCCGGA	36	0	0	24	0	0	5	1	0	0	6.6	0.317661	246
SERHL2_TCTCACTCACAAAAGTCTGG	31	0	0	0	0	0	0	0	35	0	6.6	0.318952	247
PARP4_TCTCCTGTACAAAACATCGT	12	54	1	0	0	0	0	0	0	0	6.7	0.320244	248
AP2B1_GGTGGTGGCTAATGCCGTAG	45	0	1	0	0	22	0	0	0	0	6.8	0.321535	249
ZNF100_TCTCAACCCTTACTACACAC	30	0	0	0	38	0	0	0	0	0	6.8	0.322826	250
ZNF594_TCTCTCCAGTATGAACACGA	35	0	0	23	0	0	1	8	1	0	6.8	0.324118	251
CPEB2_GTGGTCGGGGAGTTTCTCCG	1	11	15	16	12	13	0	1	0	0	6.9	0.325409	252
PEX11B_TCTCCACAAGTTCTACGCCT	16	53	0	0	0	0	0	0	0	0	6.9	0.3267	253
RHOQ_AGACGGTCATAGTCTTCCTG	3	0	0	0	1	35	30	0	0	0	6.9	0.327992	254
SPTLC2_TCTCTCCATGATGTCCACCC	20	0	5	0	13	1	0	0	0	31	7	0.329283	255
TRAPPC3_GTGGCGTTCAAGATGTACTT	10	0	4	29	0	22	0	4	0	1	7	0.330574	256
GNAZ_TCTCGCCCTTGCTCTCAGCG	34	9	0	0	0	0	0	0	28	0	7.1	0.331866	257
RAB11B_TCTCCAGGTTGAACTCGTTG	7	23	0	39	0	0	1	1	0	0	7.1	0.333157	258
CHURC1-FNTB_TCTCATGCATGTCGGAGGTG	22	0	8	0	1	0	1	0	0	40	7.2	0.334448	259
FERMT3_CCAGGTGGCTGGACTCGTCG	2	0	0	0	10	0	0	0	0	60	7.2	0.335739	260
LOC158434_GGCCGCATGATGACTGAGAC	30	9	18	0	14	0	0	1	0	0	7.2	0.337031	261
CDHR1_TCTCCCTTGACAGGGAACGA	19	0	20	1	0	0	0	0	0	33	7.3	0.338322	262
EVA1B_GGCCCGGCAGCGTGTCGTCG	16	0	0	0	14	43	0	0	0	0	7.3	0.339613	263
HGC6.3_TCTCCTCCCAACACACTGCA	33	1	0	22	0	17	0	0	0	0	7.3	0.340905	264
ARL4D_AGACGGTCTAGTGTTTGTGG	26	0	0	1	47	0	0	0	0	0	7.4	0.342196	265
OPHN1_AGACGGAGTCTATCGACAAG	8	29	0	0	37	0	0	0	0	0	7.4	0.343487	266
ZNF615_TCTCTGTTGCTTAATGAACT	34	0	0	0	2	20	6	0	12	0	7.4	0.344779	267
SOX15_TCTCGGAGTTGTGCATCTTG	43	0	0	0	0	32	0	0	0	0	7.5	0.34607	268
Control_TCATCTTACATCTGGGAGAC	68	0	0	0	0	0	0	8	0	0	7.6	0.347361	269
VSIG2_AGACGCACCCAGTTGTACAC	12	14	3	1	7	0	0	0	0	39	7.6	0.348653	270
HIST2H2AA4_TCTCGGCGGTCAGATACTCG	35	0	0	31	0	11	0	0	0	0	7.7	0.349944	271
SPRY2_TCTCTCGTGTTTGTGCTGAG	26	50	0	0	1	0	0	0	0	0	7.7	0.351235	272
GATA1_AGACGACCACCACGACACTG	22	55	0	0	0	0	0	1	0	0	7.8	0.352526	273
OR9K2_TCTCAACAGGTTTCTACCAT	29	28	15	2	0	0	4	0	0	1	7.9	0.353818	274
TIMM44_TCTCGGCCGGAAAATCAAGG	5	59	10	0	1	4	0	0	0	0	7.9	0.355109	275
YBX1_AGACGCTATCCACGTCGTAG	13	0	0	0	25	12	0	0	0	29	7.9	0.3564	276
ZNF829_TCTCTTACTTACCTGAACAC	36	0	42	0	0	1	0	0	0	0	7.9	0.357692	277
ZNF37A_TCTCAAGTTGGAGAAAGGCG	19	18	0	27	0	13	0	3	0	0	8	0.358983	278
ANKRD42_TCTCACATAGCTGCAATCAG	29	0	0	27	9	1	0	15	0	0	8.1	0.360274	279
MDM1_AGACGTACAGAAACAGCCCG	30	0	0	35	1	1	0	0	14	0	8.1	0.361566	280
SMAD7_TCTCACCTAGTTCGCAGAGT	8	0	2	59	0	0	0	12	0	0	8.1	0.362857	281
FAM218A_TCTCTTTGCTCAGACATCCA	76	0	0	0	0	7	0	0	0	0	8.3	0.364148	282
CDHR2_TCTCACCAGCACCTGAACGG	49	0	0	0	0	0	30	4	0	1	8.4	0.365439	283
CSRNP2_TCTCTTCAGCATCAATACGG	38	39	0	0	0	9	0	0	0	0	8.6	0.366731	284
KLF3_TCTCATGGTCTCCTTATCGG	15	0	0	1	29	12	19	10	0	0	8.6	0.368022	285
KRT4_TCTCAGGGTCAATCTCCACG	17	25	14	0	0	2	14	13	1	0	8.6	0.369313	286
POLR3C_TCTCAGTGGTAGGTACCGAA	40	21	0	0	6	11	0	0	0	10	8.8	0.370605	287
WFDC5_TCTCTTACAGAGAAATCGGG	31	0	20	0	24	0	13	0	0	0	8.8	0.371896	288
GCKR_TCTCACGGAAATCGATACTG	40	0	33	1	0	0	0	2	14	0	9	0.373187	289
MRPL48_TCTCCATTAAAGTCGAGGAA	41	0	0	29	19	0	0	1	0	0	9	0.374479	290
USP6_TCTCCGGAACCTGATTGACG	25	0	1	23	1	26	0	0	15	0	9.1	0.37577	291
TTC17_TCTCCACGATGATAGCGTAC	33	0	0	12	19	0	17	0	11	0	9.2	0.377061	292
ZFYVE1_TCTCTGGCTTAGATTCACGG	48	21	0	23	0	0	0	0	0	0	9.2	0.378353	293
RAB11A_CATTTCGAGTAAATCGAGAC	38	14	0	0	5	27	9	0	1	0	9.4	0.379644	294
PAF1_AGACGTTGAAGAAACGAAAG	17	17	1	0	9	18	0	0	1	32	9.5	0.380935	295
NFRKB_TCTCAGATAAAGTAGAACTG	22	17	0	1	9	0	1	10	0	36	9.6	0.382226	296
ATF4_TCTCTTAGATGATTACCTGG	36	48	0	1	0	0	0	0	0	12	9.7	0.383518	297
ATP5B_GGTGGACGTCCAGTTTGATG	69	11	0	0	0	18	0	0	0	0	9.8	0.384809	298
TRA2A_TCTCGATATGGACCATTGAG	23	56	19	0	0	0	0	0	0	0	9.8	0.3861	299
ZNF692_TCTCCGAGTAGTATGTGGAA	30	34	0	0	23	10	1	0	0	0	9.8	0.387392	300
PTPRH_AGACGGAGTAAATAGCTCTG	27	0	0	0	0	33	0	0	1	38	9.9	0.388683	301
CEP112_TCTCACATACCAGAGAAACT	11	65	0	0	0	25	0	0	0	0	10.1	0.389974	302
CTAGE15_TCTCCAGCTGTTCAGTGGCA	40	43	0	0	17	0	0	0	0	1	10.1	0.391266	303
LRMP_TCTCCCACGATAGAGGCCCA	53	49	1	0	0	0	0	0	0	0	10.3	0.392557	304
ERICH1_AGACGTTAAAGATACCAGGG	21	13	56	0	14	0	0	0	0	0	10.4	0.393848	305
TAS2R16_TCTCTCGCTTCTGTCTACAG	29	51	0	5	0	18	1	0	0	0	10.4	0.39514	306
OR13J1_TCTCAGTCACCGACTTGAGG	30	58	0	0	17	0	0	0	0	0	10.5	0.396431	307
RLTPR_AGACGTTCCTCGAAGCGTCG	49	0	0	0	34	22	0	0	0	0	10.5	0.397722	308
MKS1_TCTCAAAGTCGGTGCCTACG	40	0	1	0	14	13	14	6	0	18	10.6	0.399013	309
SUMO2_ATATTAATTTGAAGGTGGCG	59	36	0	0	10	0	1	0	0	0	10.6	0.400305	310
SP6_TCTCCTAGGGCCGCCCGACG	77	0	0	0	25	5	1	0	0	0	10.8	0.401596	311
ADORA2B_TCTCAAAGAGACACTTCACA	14	26	13	0	26	18	0	1	2	9	10.9	0.402887	312
WDR86_TCTCACCTCCAGACAGATGA	43	1	14	30	1	0	0	0	20	0	10.9	0.404179	313
P2RX5_AGACGGCTAAAAGAATAGTG	38	0	54	0	12	5	0	0	1	1	11.1	0.40547	314
PDCD1_AGGGCCCGGCGCAATGACAG	22	0	0	0	0	0	34	55	1	0	11.2	0.406761	315
PYHIN1_AAACCATCTGAAGAAGAGAC	61	18	9	1	9	0	11	3	1	0	11.3	0.408053	316
TRIM31_TCTCCAGTTCCAGAGGAACA	44	0	0	0	0	0	28	0	0	41	11.3	0.409344	317
OR2M2_GGTGGCAAATAGCAATATAG	24	0	17	0	30	42	0	1	0	0	11.4	0.410635	318
KCNMA1_TCTCCATATTTATCAGCACG	23	76	0	11	1	0	0	4	0	0	11.5	0.411926	319
CAMTA1_TCTCGCATACCACGACCACA	14	76	0	0	0	0	1	10	15	0	11.6	0.413218	320
OR51V1_TCTCTCGAATGATCCCCCAC	42	14	3	4	9	0	1	6	37	0	11.6	0.414509	321
LPCAT2_AGACGCAGATCGGCTCCGCG	18	46	0	10	11	0	0	32	0	1	11.8	0.4158	322
RNF38_AGACGGGGAGATACATTCGG	21	51	2	0	0	10	0	0	34	0	11.8	0.417092	323
AUTS2_TCTCTAGACCCGATATCTTG	46	0	0	7	25	29	0	12	0	0	11.9	0.418383	324
ZNF720_GGCCATAGAATTCTCTCGGG	94	0	12	0	2	0	0	0	11	0	11.9	0.419674	325
RNASE9_AGACGTGTCCTTATTGAACC	26	0	0	0	0	0	0	0	48	46	12	0.420966	326
USP38_TCTCTATGAACCTATTCTGG	46	25	0	0	0	16	19	14	0	0	12	0.422257	327
SEC22B_GGAATAGGGTCGGGACACAG	109	12	0	1	1	0	0	0	0	0	12.3	0.423548	328
HGC6.3_TCTCCTCCCCACACACTGCA	15	3	44	20	0	4	26	12	0	0	12.4	0.42484	329
ZNF343_TCTCCATCGAGTGTATACGA	29	16	1	0	0	21	35	22	0	0	12.4	0.426131	330
COMMD2_GCAAACCCAAAAATCTACGA	108	0	0	0	12	0	4	0	1	0	12.5	0.427422	331
FITM1_AGACGGTGTAGCCTCGCCAC	3	0	14	1	8	8	0	0	56	35	12.5	0.428713	332
SCN3B_TCTCTCGTGCTTATCTACTG	10	59	0	0	22	22	0	12	1	0	12.6	0.430005	333
ZNRF4_AGACGTGGGTCATGCTCACG	20	50	0	0	46	0	10	0	0	0	12.6	0.431296	334
MAGEA12_TCTCTGGAGTCAATCCGATG	49	1	1	0	26	49	0	0	1	0	12.7	0.432587	335
TDRD12_AGACGTAATTGATTTGACAA	45	33	12	19	0	1	0	0	18	1	12.9	0.433879	336
HIVEP3_AGTGTGGGCGAATAGGACAG	38	53	29	1	0	7	0	1	1	0	13	0.43517	337
XPNPEP1_AGACGGCAGAATGCCTCCAA	17	78	0	0	10	0	0	25	0	0	13	0.436461	338
ATOX1_TCTCGGGTCCTCAATAAGCT	6	65	0	0	18	0	0	0	37	7	13.3	0.437753	339
CENPP_TCTCTTCCCAGGGCGCCGGT	18	11	0	0	33	0	1	2	58	10	13.3	0.439044	340
COX15_TCTCAACTGTAGGAGTTGGT	22	37	0	45	0	13	5	0	11	0	13.3	0.440335	341
PCDHGA7_AGACGATGAAACTAAGTACC	21	35	0	39	6	0	5	6	21	0	13.3	0.441627	342
POLR1B_TCTCACTTATCAAGACCGAT	18	27	0	54	1	21	0	12	0	0	13.3	0.442918	343
CDH16_TCTCAATGGCAAAATCCATG	14	1	0	83	1	33	0	1	1	0	13.4	0.444209	344
USH2A_TCTCTCAGAATAAACGACCC	30	48	0	17	18	16	0	5	0	0	13.4	0.4455	345
DNPEP_TCTCTTACCACAGCATTGAG	21	0	29	17	14	0	32	1	0	23	13.7	0.446792	346
LYRM4_TCTCTTGGCTTTATTCACTA	41	55	1	1	4	0	1	0	34	0	13.7	0.448083	347
IL1F10_TCTCCACACATGCCAGGCAG	47	26	0	0	0	53	0	0	1	11	13.8	0.449374	348
CEP70_ATTTATAAACAGACCAAAGG	97	0	0	4	6	14	0	0	0	19	14	0.450666	349
LEMD1_TTGGATTATAAGCCTTCCAA	67	0	1	0	0	18	0	19	0	35	14	0.451957	350
YWHAZ_TCTCTGCTTGTGAAGCATTG	81	0	12	40	7	0	0	0	0	0	14	0.453248	351
PFKL_TCTCGGGGAACCAGTCAGTG	38	33	21	0	0	33	1	14	1	0	14.1	0.45454	352
BTBD8_TCTCTGTCACTGATATCCTC	66	0	0	1	17	0	0	1	1	56	14.2	0.455831	353
C16orf82_TCTCCCTCGAGAAAAATGGG	20	1	0	33	5	38	13	31	0	1	14.2	0.457122	354
FAM109B_TCTCCAACTCGCGTACCACC	116	0	26	0	0	0	0	0	0	0	14.2	0.458414	355
PPP1R36_TCTCTGTCAAGTGTTGACGT	37	57	0	0	0	17	0	0	34	0	14.5	0.459705	356
BMP1_TCTCACGAACGATGGAAACG	28	0	46	28	0	36	6	1	1	0	14.6	0.460996	357
PTPN11_TTATAAGAAGAATCCTATGG	50	10	20	0	17	0	2	0	47	0	14.6	0.462287	358
HSPA4L_GGGTGGCAGGAACTTTGATG	43	24	28	30	9	12	0	0	0	1	14.7	0.463579	359
DUSP19_TCTCAGGAAGCAATGCACCA	21	29	0	0	10	32	15	17	22	2	14.8	0.46487	360
FEN1_TCTCCATCATGCGAATGGTG	25	111	0	0	11	1	0	0	0	0	14.8	0.466161	361
PRRC1_GGTGGCATAGAAGTAACAAG	30	29	25	10	15	3	36	0	0	0	14.8	0.467453	362
OTUD7A_TCTCTGTTCCATGGACACAA	14	0	1	85	14	0	22	14	0	0	15	0.468744	363
PRAC2_TCTCGAATGGAAGAAGAAGG	30	6	22	0	0	58	0	9	25	0	15	0.470035	364
HIRIP3_TCTCTCCGGGTCGCTACAAG	62	0	2	14	16	1	1	3	7	45	15.1	0.471327	365
TBX18_TCTCATCCAAGTCTCCCCCG	18	27	26	0	0	39	38	1	1	1	15.1	0.472618	366
KHK_GGTGGACAAGTACCCTAAGG	71	33	1	1	13	0	1	0	2	30	15.2	0.473909	367
FHIT_TGGTGGAAAAACATTTCCAT	41	50	0	0	31	0	0	0	0	32	15.4	0.4752	368
CCNL1_TGCAGGTGGCGATGGCAACG	67	0	13	0	24	35	2	0	0	14	15.5	0.476492	369
MIR205HG_TCTCAAGTACCCATCTTGGA	24	78	0	2	1	5	0	13	1	33	15.7	0.477783	370
PCDHGA4_TGGGGATATAACAATATTGG	77	66	15	0	1	0	0	0	0	0	15.9	0.479074	371
DLX5_AGACGGATGGTGCATAGCTG	86	39	0	7	9	0	0	0	1	18	16	0.480366	372
GPRIN1_AGACGTATACAGTGTCACCG	11	2	53	22	12	8	9	44	0	0	16.1	0.481657	373
HPS4_GGGATAATCTGGACATTCGG	115	23	0	1	0	21	1	0	0	1	16.2	0.482948	374
WDR4_TCTCGTCCCGGTCGGCAGTG	41	0	9	49	9	3	1	21	29	0	16.2	0.48424	375
CLDN22_TTGTGGGCAACCCAAGAGAC	29	23	9	0	29	18	0	17	39	0	16.4	0.485531	376
RAB37_TCTCCCAGAAGCATCACCTA	19	0	0	20	0	0	0	42	27	56	16.4	0.486822	377
KIR3DL2_TCTCCTGGAATATTCTGCCG	14	62	36	0	0	45	7	0	0	1	16.5	0.488114	378
OR2M5_GGTGGCAAATGGCAATATAG	40	59	0	48	0	0	4	0	16	0	16.7	0.489405	379
ESRRA_GTGGGCGGCAGAAGTACAAG	58	2	15	36	6	13	15	7	0	16	16.8	0.490696	380
KRT82_TCTCGTTCTTACGGTTGCGG	46	0	0	1	0	1	4	58	39	19	16.8	0.491987	381
SMIM18_CTGTAAATATAAATAAAAGC	85	28	0	13	11	26	0	4	1	0	16.8	0.493279	382
ARHGAP22_TCTCCAGAACAGCCCCCACG	29	18	1	1	32	7	16	19	0	46	16.9	0.49457	383
EIF4A3_CCTGAATATCCAAACACTGG	168	0	0	0	0	0	0	0	1	0	16.9	0.495861	384
PRG4_TCTCGAAGGACTCAAAGCAG	23	31	56	12	0	0	24	5	19	1	17.1	0.497153	385
SGTA_TCTCCTGAGCATCGGACGAG	18	55	0	10	28	20	36	7	0	0	17.4	0.498444	386
ING1_TCTCTGCAAGTCGAAAGGCA	69	66	17	0	1	1	14	6	0	1	17.5	0.499735	387
SMIM11_TCTCTGCCTGACATTTGCTG	74	0	13	0	61	13	1	13	1	0	17.6	0.501027	388
CCL17_TCTCTGCAGCACATCCACGC	93	14	21	27	0	11	0	14	0	0	18	0.502318	389
ERGIC2_TCTCAGTATATCAAGATACA	14	20	0	0	44	50	19	33	0	0	18	0.503609	390
IL1RN_AGACGATCTGCCGACCCTCT	21	33	0	12	50	10	4	21	15	14	18	0.504901	391
OR2V1_TCTCTCTTGTGGGATCTGAG	34	0	54	19	5	63	6	0	0	0	18.1	0.506192	392
APELA_TAAAAATAAAAAATGCAAAA	103	26	3	34	4	12	0	0	0	0	18.2	0.507483	393
ARHGAP19_GCTTGAGAGACATGAGAGAC	48	1	18	46	1	41	13	14	0	0	18.2	0.508774	394
FBXO47_ATAAGAAATTATAAACGCGA	140	24	0	0	8	1	10	0	0	0	18.3	0.510066	395
RPN1_CAGAGTCATCCAAAATAAGG	118	55	1	0	10	0	0	0	0	0	18.4	0.511357	396
RPS14_CCGGAGTTTGATGTGTAGGG	164	0	0	2	17	1	0	0	0	0	18.4	0.512648	397
STXBP5_TCTCAGGCTACGTCATTATG	52	7	13	0	49	51	13	0	0	0	18.5	0.51394	398
C4orf33_TTGGTGGAAAATAACTCCAA	32	15	42	19	11	43	0	0	23	2	18.7	0.515231	399
ACR_TAATGTGCATGACTGGAGAC	70	46	29	1	0	18	12	10	1	1	18.8	0.516522	400
CBX3_AAAGCTGGCAAAGAAAAAGA	78	45	12	0	0	30	5	0	18	0	18.8	0.517814	401
PDZD9_CAATATCCATCTCCAGAGAC	56	0	0	0	0	14	60	0	51	8	18.9	0.519105	402
RBBP5_TGGGGATGGGGAATACATCG	132	24	0	4	24	4	0	1	0	0	18.9	0.520396	403
SLC25A41_AGACGCGGTTGACCTTGCGT	88	0	33	1	13	0	37	0	15	2	18.9	0.521687	404
CYB5RL_TCTCCAGGACTCAACATACC	44	0	0	60	20	25	34	6	1	0	19	0.522979	405
UTS2_AGACGCGCGCTTAACTCCGG	34	11	0	11	18	15	51	7	25	18	19	0.52427	406
AP4S1_TCCTCATGGTGAATAAACAA	110	18	1	1	0	61	0	0	1	0	19.2	0.525561	407
KRT5_TCTCATGCTTGGTGTTGCGG	23	2	0	0	0	17	74	59	16	1	19.2	0.526853	408
ACO2_TCTCGGGGTTTGCGTCGTTG	55	0	28	13	29	19	1	48	1	0	19.4	0.528144	409
DCAF5_GGGACATTCGAAAACCTCAG	74	56	17	0	9	17	10	10	1	0	19.4	0.529435	410
MPP1_GGTGGCATGATCCATAGACA	55	0	32	1	10	50	5	0	39	2	19.4	0.530727	411
MYRF_TCTCAGAGCGCATCATTGTG	44	33	0	18	32	6	16	28	15	2	19.4	0.532018	412
LRRC41_AAGTAATATATATTGAGCAG	110	18	25	4	1	23	0	9	4	1	19.5	0.533309	413
SPATA31C2_TCTCCCAGCGTCCAGCAGGG	64	0	13	0	0	45	1	0	2	70	19.5	0.534601	414
HIST2H2BE_ACCAAAGCCCAGAAGAAAGA	151	24	0	1	2	0	1	0	1	17	19.7	0.535892	415
SYF2_TCTCTGTTCGCGCTTCTGAG	49	64	0	15	12	0	17	0	40	0	19.7	0.537183	416
HMMR_GGAAGAATTAAAGCAAACAC	135	12	1	22	9	12	7	0	0	0	19.8	0.538474	417
KRT7_TCTCATTCCGGGTATTCCGG	20	17	26	37	25	39	0	24	9	1	19.8	0.539766	418
IGFBP4_ACTTCGCCAAAATTCGAGAC	70	46	7	38	5	0	12	21	0	0	19.9	0.541057	419
MFGE8_TGATGTTAATAAAAAACACA	140	20	0	0	9	14	0	0	0	18	20.1	0.542348	420
SOGA1_TCTCTAAGGACATCTCCATG	58	37	0	10	23	41	20	2	1	9	20.1	0.54364	421
NBPF15_GTGGGATCAAGTGAAAAAGG	142	6	0	26	1	0	0	6	21	0	20.2	0.544931	422
CENPB_TCTCCCTACGACAAGCTCGA	83	0	0	1	1	2	63	3	23	27	20.3	0.546222	423
HEXA_TCTCAGAGAGGAGTAAACAC	28	98	9	0	0	43	25	0	0	0	20.3	0.547514	424
SLCO1B7_ATTACAAATATAACATACAG	141	0	0	25	4	11	21	0	0	1	20.3	0.548805	425
DOK5_TCTCCTAACTTAGATGTACA	13	0	29	45	32	0	23	41	21	0	20.4	0.550096	426
CCDC18_GGAATGTATAAAATTAAAGG	92	8	31	30	9	26	5	5	0	0	20.6	0.551388	427
FXYD1_TCTCTTTCCAGAAAGTCCAA	21	0	20	42	47	47	1	16	11	1	20.6	0.552679	428
RTFDC1_AGCCTTGAAAGAGATAAAAG	102	51	0	15	12	6	18	0	1	1	20.6	0.55397	429
TCF4_TCTCATAATGGAGCCATGGG	31	17	39	40	29	0	0	1	0	49	20.6	0.555261	430
CDH19_TCTCTGAATCTGCACCCACT	39	30	1	72	23	42	1	0	0	0	20.8	0.556553	431
DONSON_AGGTACAAACGTAGAAATAG	133	48	0	0	0	27	0	0	0	0	20.8	0.557844	432
FABP5_TGGCGCCTGGTGGACAGCAA	158	1	0	0	40	7	0	2	0	0	20.8	0.559135	433
GPR37_AGACGGCCAATGGACTGGCG	35	19	43	42	24	0	30	0	15	0	20.8	0.560427	434
NEURL3_AGACGCCAAGGCGCCCCGAG	39	63	0	14	30	63	0	0	0	0	20.9	0.561718	435
COPS2_GTGGTTTAAGACAAACACAA	129	59	2	0	1	15	1	1	2	0	21	0.563009	436
PCDHA8_GGTGGCGTCCAAAAGACACC	51	127	0	0	9	0	2	0	20	1	21	0.564301	437
RPAP2_GGAAGACAGAAGAAACATTG	168	24	0	0	17	0	1	0	0	0	21	0.565592	438
APLN_AGACGGCAATGTCCGCCACC	25	1	99	47	0	0	0	0	39	0	21.1	0.566883	439
NEK7_TCTCGAAGAGTCATGCATAG	56	30	0	7	37	30	32	0	8	11	21.1	0.568174	440
RPL34_GTAAACAATTCTATTACCAG	124	11	9	36	1	9	21	0	0	0	21.1	0.569466	441
EIF5A_TCTCGACGATCTTACATGGC	90	54	3	0	22	18	1	1	2	25	21.6	0.570757	442
TIGAR_TCTCTCCAAAATTCCATGCA	57	32	32	1	23	70	0	1	1	0	21.7	0.572048	443
ZNF350_TCTCACATAGACTACATCTG	2	0	43	0	81	29	41	16	0	5	21.7	0.57334	444
TMEM246_TCTCAAACGAGTTGGTCGAA	70	87	0	1	19	0	0	0	41	0	21.8	0.574631	445
SLC17A3_CTATGGTGGCATACTGACAA	63	58	21	9	7	25	4	0	29	4	22	0.575922	446
PTGES3L_TCTCCCGACCATATAAGGAG	12	20	12	19	18	18	0	34	11	78	22.2	0.577214	447
TUBD1_ATAGAGGGACAAATACCTAG	128	1	0	0	56	11	1	0	27	0	22.4	0.578505	448
BCAR1_GTGGACGGCACTCTGGACAG	76	16	70	0	8	8	0	8	0	39	22.5	0.579796	449
LOC102724862_GGCATATGAGGAGTATAACC	153	34	1	2	0	30	0	1	1	3	22.5	0.581088	450
MSR1_GATATAACTCAAAGTCTCAC	184	17	16	0	0	2	0	3	0	3	22.5	0.582379	451
ZNF493_AGGGGTTGAGAAAATACTAA	84	3	2	28	18	66	0	16	8	0	22.5	0.58367	452
ARL13A_GGACAACAGAAGAGACACGA	162	0	1	0	47	0	0	19	0	0	22.9	0.584961	453
CCDC138_AAGGTTGATAAAAATCTCAA	106	47	1	1	13	38	9	6	8	0	22.9	0.586253	454
BOLA3_TCTCCTCCGCGGGATCCGCG	27	0	57	54	28	28	10	25	0	1	23	0.587544	455
MYL7_AGACGTTGGAAGAACCACGT	58	0	49	39	12	40	0	0	32	0	23	0.588835	456
E2F6_TCTCCTCCGTCGGGTCCAGG	25	64	49	9	9	35	22	16	1	1	23.1	0.590127	457
MARC1_TCTCAGTGCAGCCTACACAA	69	100	14	11	18	3	0	15	1	0	23.1	0.591418	458
RPL18_TCCTGGCCGGGAAAACAAGA	155	4	32	0	38	1	0	1	1	0	23.2	0.592709	459
TPRG1L_GGATCACTGGAACAATGAGA	170	24	1	0	13	24	0	0	0	0	23.2	0.594001	460
GDE1_AGACGCGCAGTAGAACGAAG	3	0	118	33	0	8	58	0	0	13	23.3	0.595292	461
GUCA1A_CCTCAAGAACCTGAGCCCGT	110	25	0	0	9	0	60	0	11	19	23.4	0.596583	462
KYNU_GGTGGCTCTCCACCTAGATG	36	112	1	10	0	22	12	12	13	17	23.5	0.597875	463
LMNA_TCTCACTCATCCCAGACACA	28	56	62	24	16	0	14	0	34	1	23.5	0.599166	464
DBF4B_TCTCTGCCTTTACTTCTCTG	68	48	0	41	11	13	0	0	0	55	23.6	0.600457	465
MRPL20_CTGGATCCGAAAGTAGCGGT	102	44	6	11	26	29	0	0	18	0	23.6	0.601748	466
ALG1L2_TGTGCTGGAAATGCTTCTGG	189	25	0	1	0	20	0	0	2	1	23.8	0.60304	467
LPPR2_CTGGTCAGTGACAAAGCGGT	72	51	0	0	64	22	0	30	0	0	23.9	0.604331	468
NBAS_TCTCCAAACGAGATCGTTTG	11	0	41	0	25	83	0	79	0	0	23.9	0.605622	469
GFAP_AGACGCTGCTGCCCGCAACG	76	1	0	0	43	94	0	1	25	0	24	0.606914	470
CD226_TCTCTTTACACTTACCCACA	36	35	11	53	37	1	13	46	0	11	24.3	0.608205	471
PFDN6_CAGAAGTTTAAAGACCACGT	147	22	0	30	0	12	0	24	8	0	24.3	0.609496	472
CASQ1_AGACAAGCCCAATAGCGAAG	119	66	2	39	13	1	0	1	0	3	24.4	0.610788	473
MED28_GATCAGGAAGAAATTCGAAC	119	27	0	0	34	16	0	1	15	32	24.4	0.612079	474
RAB30_AGAACAATATGCCAGCAACA	147	1	0	1	54	1	5	0	35	0	24.4	0.61337	475
C9orf57_GGAACCTGCCAGACAAAACC	128	0	0	0	0	6	0	31	0	80	24.5	0.614661	476
LDOC1_TCTCGCCATTAAACGTTTCG	18	23	40	27	47	48	20	1	20	1	24.5	0.615953	477
RANBP2_ACGGGAATTCTATCGCCCAG	133	51	1	11	0	17	3	1	30	0	24.7	0.617244	478
RPL14_GAAGATTGAAGCCAGAGAAA	121	29	0	34	0	26	0	0	21	16	24.7	0.618535	479
SEC62_TACCAATAAAATAATCAACC	187	0	1	0	8	34	1	0	15	1	24.7	0.619827	480
GCSH_AATTCACAGAGAAACACGAA	194	17	1	0	22	12	1	0	0	1	24.8	0.621118	481
ING3_TCTCGCGCATTTCCGTGAAG	25	93	32	1	25	10	35	0	17	10	24.8	0.622409	482
NUP153_CCTGGAAAAACAACATACGG	135	12	15	31	24	15	0	0	0	17	24.9	0.623701	483
CCDC51_TCATGAGAAGGAGCGCACAA	120	0	0	8	51	50	2	1	0	18	25	0.624992	484
ISCA1_GATGAAGAAGTTATTCAAGA	101	23	45	27	44	2	0	8	0	0	25	0.626283	485
UFD1L_GATGGCAATCACATCCCCGG	246	0	0	0	3	1	0	1	0	0	25.1	0.627575	486
GABRG3_CCGCAATTCTAAAACCGCAG	80	10	16	38	20	40	0	16	1	31	25.2	0.628866	487
KIF18A_CCGGGAAGATACCCAAAAAG	116	1	22	18	14	47	0	0	34	0	25.2	0.630157	488
RILP_AGGCTAAAGAGCGAGCGCGG	160	1	2	0	6	23	18	0	17	25	25.2	0.631448	489
GABRA3_TCTCGGAAAGAACAAATCCG	52	71	18	2	16	44	0	0	48	2	25.3	0.63274	490
FNDC9_TGAGCCGCGATGGTCTTACA	94	2	39	56	38	0	0	16	0	9	25.4	0.634031	491
CCDC176_TCTCTTACACAATAGCCTCA	85	2	32	29	21	38	23	24	0	1	25.5	0.635322	492
KLHL1_GGTGGCCCACAGCTACACAA	84	0	61	0	18	0	0	11	0	81	25.5	0.636614	493
RICTOR_TCTCCAAGGTGGGATAACGC	59	9	0	18	0	51	78	0	31	11	25.7	0.637905	494
MVK_CAGCATTGTCCACTCCGGAG	131	70	0	0	16	40	1	1	0	0	25.9	0.639196	495
ADM5_TCTCCACCAAGGAGCCCTCG	17	40	68	0	41	0	19	6	37	32	26	0.640488	496
C12orf77_ATATTTCTGGTGGCATTCGG	32	71	24	23	31	13	16	50	0	0	26	0.641779	497
TOPAZ1_GGAGGTACTAATAAACACAG	141	40	1	0	5	26	15	0	0	32	26	0.64307	498
ARSJ_TCTCTGAGTGTACATCTGTG	62	0	0	1	72	22	28	21	36	19	26.1	0.644362	499
PALM3_TCTCTCCCAGTCCATTGTCG	50	24	51	0	28	42	65	1	0	0	26.1	0.645653	500
ZNF830_GGAAAGGAGAGAAAACACCG	133	6	0	36	10	8	1	0	33	34	26.1	0.646944	501
ERICH1_AGACGTTAAAGACGCCAGGG	24	35	36	82	18	0	11	56	0	0	26.2	0.648235	502
TXNDC8_GGTACAGATTATTAAAGACA	112	22	35	0	2	42	31	16	1	1	26.2	0.649527	503
ADGRL2_TCTTTAACAAAGAAAGAACG	85	85	1	29	7	0	13	2	18	24	26.4	0.650818	504
CACNA1A_TCTCACCTTGTACGACGGTG	37	97	0	0	17	82	26	4	1	0	26.4	0.652109	505
ACP1_ACATAGTATATAATCAAATG	114	17	0	18	48	33	31	1	0	3	26.5	0.653401	506
HOXC10_TCTCCTCCTTGACACTAGGT	86	77	27	0	5	1	0	0	1	68	26.5	0.654692	507
OR2T34_TCTCAGCAAAGAGTCCCGTG	35	16	12	99	0	16	60	25	0	2	26.5	0.655983	508
ATP6V1B2_TGGGGATATTCTCCGAACAC	163	77	1	0	10	4	2	1	3	6	26.7	0.657275	509
AURKA_CCTGAAAACTCACCGAAGGT	137	101	1	17	10	0	0	1	0	0	26.7	0.658566	510
BUB1_TCAGAGAGGAATTCAAAACC	120	44	31	2	18	32	1	10	9	1	26.8	0.659857	511
GCSH_GGGACAAAATTGAACAAACA	84	27	26	26	45	15	0	24	20	1	26.8	0.661148	512
C17orf53_AGACGAATTTGATAAAGTCC	73	31	49	14	23	61	1	0	18	0	27	0.66244	513
GALE_TCTCCACGGCCAGATCATGA	31	26	49	0	16	66	1	35	1	45	27	0.663731	514
OR4C3_TCTCTGTGCCATGCTTGTAG	50	1	45	43	63	27	36	5	0	0	27	0.665022	515
PAIP2_GTTTGTGGGAGATCTCGAGC	157	0	44	1	6	52	1	10	1	0	27.2	0.666314	516
USP17L17_GCATAGAGGACATAGACAAG	123	55	0	18	19	9	1	1	11	35	27.2	0.667605	517
PWP2_GGTGGCAGTAAAGGTCACAC	118	43	0	1	47	28	1	1	32	2	27.3	0.668896	518
ZNF45_TCTCCCGTATGAACTATCAG	49	0	63	104	5	46	0	4	1	1	27.3	0.670188	519
NDUFA12_AAAAAACCCGTAGATAGCCT	83	41	0	1	32	31	19	0	21	46	27.4	0.671479	520
USP17L28_GCATAGAGGACATAGACGAG	123	0	9	1	60	38	6	0	16	21	27.4	0.67277	521
ARTN_TCTCATTCCAGGGGGACGCA	13	79	67	43	19	1	16	8	17	12	27.5	0.674062	522
GAGE10_GTTTAAGCACTCACCAGCAT	178	1	8	12	20	17	24	0	0	15	27.5	0.675353	523
GLT8D1_AGGATTAAATGAGCAAGTGC	152	50	11	0	10	38	0	0	0	14	27.5	0.676644	524
PSMA6_GCATACTTACAACAACCAAG	234	7	23	0	9	0	2	0	0	0	27.5	0.677935	525
TMEM204_GGTGGACGCACATGACTGTG	44	58	16	51	10	72	0	23	1	0	27.5	0.679227	526
SCAF1_GGTGGCTGAGGTCCGAATCG	85	7	1	13	31	51	0	1	68	21	27.8	0.680518	527
C9orf116_CGGGCAGGTTCAACAACCCG	93	89	73	14	5	0	3	1	1	0	27.9	0.681809	528
KPNB1_ATCTTGGCAAATATAACCGA	229	22	0	1	0	25	1	0	0	1	27.9	0.683101	529
SBNO1_TTATTCAAGCAGTAGAACGG	180	22	0	0	49	27	0	1	1	0	28	0.684392	530
ID2_CAGCATCCCCCAGAACAAGA	165	7	0	1	19	0	1	1	0	87	28.1	0.685683	531
PARP12_TCCGGCCTGGAACTTCAAGG	166	61	0	1	22	1	22	0	9	0	28.2	0.686975	532
ATP6V1B2_TCAATGTCGAATCTACCCAG	254	13	0	1	6	0	1	0	8	0	28.3	0.688266	533
MRPL37_AGACGCGGGGCGTATGAGTG	36	44	59	22	34	47	14	26	1	0	28.3	0.689557	534
DDX24_GGAATTGACAGATTACCAGT	202	32	0	2	47	0	0	0	1	0	28.4	0.690849	535
EFTUD1_TATTAATCACTAAAACCGGA	175	19	0	52	20	15	1	0	2	0	28.4	0.69214	536
MYCBP2_ACAGATACTCTACTATAGGT	138	0	11	1	8	58	1	8	54	5	28.4	0.693431	537
SLC26A5_GGTCACTGAAAATCCAACGA	124	17	22	0	13	87	0	1	20	0	28.4	0.694722	538
SLC38A2_GGATATTTGGGATATACCAG	128	2	19	17	28	44	9	0	2	35	28.4	0.696014	539
ARFGEF2_TCTCGTGAGTCCTGAATACG	46	2	88	2	71	21	12	43	0	0	28.5	0.697305	540
CCNA2_CTGAAGTCCGGGAACCCGCG	127	91	0	2	54	0	0	0	0	11	28.5	0.698596	541
RPS6KA4_TCTCTTTGACCACAACAACG	144	7	13	1	9	51	1	12	46	1	28.5	0.699888	542
SBDS_CAACAAGAGTACAAAACAGC	183	13	52	17	9	2	0	0	0	9	28.5	0.701179	543
ZNF626_GGCCATAGAATTCTCTCTGG	176	19	2	1	24	17	0	0	1	45	28.5	0.70247	544
NEK7_TGGTACTCCATCCAAGAGAC	52	24	0	37	44	23	52	53	1	0	28.6	0.703762	545
SLC3A2_GCGCAGAAGTGGTGGCACAC	59	56	0	12	25	34	71	10	19	0	28.6	0.705053	546
GABARAP_GAAGATCCGAAAGAAATACC	81	53	14	18	47	34	1	18	18	3	28.7	0.706344	547
HIST2H3C_GGTGGCCAGCTGCTTCCTCG	211	14	0	1	36	0	23	2	0	0	28.7	0.707635	548
ACER1_GGTGGCCGAGTTCTACAACA	58	109	0	16	8	29	8	60	0	0	28.8	0.708927	549
MED11_CCAAGGAAAAAACTAACGAG	99	0	6	13	86	30	0	6	29	19	28.8	0.710218	550
Control_CCGTCTCCGCATCGTCTTTT	11	55	63	10	50	0	59	40	1	0	28.9	0.711509	551
MAD2L1_AATGTGGTGGAACAACTGAA	94	4	11	59	18	62	0	3	23	15	28.9	0.712801	552
RAB27A_CTCCAAATTTATCACAACAG	178	10	1	0	31	24	20	12	12	1	28.9	0.714092	553
ZNF705E_AGGGGACAAAAGATTACTAA	195	38	1	27	27	0	1	0	0	0	28.9	0.715383	554
CDC27_TGAATCAATATAAGACACTG	226	29	0	2	0	1	20	0	1	11	29	0.716675	555
DPP4_GGATTCCAAACAACACACAG	148	46	25	0	35	11	1	0	23	1	29	0.717966	556
MESP1_CCGACAGGTGGCCGATATAG	78	53	16	35	83	25	0	0	0	0	29	0.719257	557
EIF2AK1_GGCCCGGACCCCGAATATGA	69	26	34	1	59	23	36	2	29	12	29.1	0.720549	558
CEMP1_TCTCAGCCCACAAGCCCCAG	61	11	12	0	62	34	0	0	39	73	29.2	0.72184	559
NUDT7_CAATATCATACTTTCTTAAG	204	2	1	1	16	18	28	1	21	0	29.2	0.723131	560
TMEM205_CATGTGGGCCCTGCAAACCG	30	1	25	39	89	1	33	60	14	0	29.2	0.724422	561
TRAPPC1_GAAGCAAGCAGGGATTCCCA	170	38	6	0	10	11	1	15	40	1	29.2	0.725714	562
GLT8D1_TGGCAAGTAGAACCTTGCAA	159	41	1	17	18	28	14	14	1	0	29.3	0.727005	563
MROH7_TCTCAAGGCCTGACTCACAG	68	56	49	0	65	0	38	0	0	17	29.3	0.728296	564
FAM96B_GATGGACAGACCAATAAGGG	93	133	0	0	25	38	0	1	3	1	29.4	0.729588	565
GOLGA8R_TGAACATATAGAAGGAGAGA	137	42	0	1	17	9	1	41	3	43	29.4	0.730879	566
CSH1_GGAAGAAACCTATATCCCAA	174	28	1	24	38	0	29	0	1	0	29.5	0.73217	567
KIR2DL4_TCTCTCCTGCGCGAACCGTG	68	17	50	0	32	66	21	16	25	0	29.5	0.733462	568
OR2L5_TGACTAAGCAGGAAATACAT	191	10	4	0	29	47	0	1	13	0	29.5	0.734753	569
RRM1_CCTACCTAGAAAGTTGTGGG	258	1	1	0	0	21	0	12	1	1	29.5	0.736044	570
EFCAB13_TCTCCTTTCTGAGATCGTCG	40	90	1	61	28	4	15	0	55	2	29.6	0.737336	571
GOLGA4_CAGTATCATTAAAGAACACG	135	51	24	8	33	26	0	1	5	13	29.6	0.738627	572
RPL3_CCGTGTCATTGCCCACACCC	228	33	0	0	17	5	0	0	13	0	29.6	0.739918	573
GALP_TCTCTGCCAGGCTCAGCAAG	39	10	37	125	14	0	21	5	0	46	29.7	0.741209	574
SH3GL3_AGACGAAGAAGTCAGACAAG	87	92	0	0	40	36	11	2	29	0	29.7	0.742501	575
PPP2R2A_AAAATCCAGTCTCATAGCAG	167	67	0	5	24	11	0	0	0	27	30.1	0.743792	576
CYGB_GCGCATACCTTGAAGTACAC	178	11	33	16	21	0	39	1	2	1	30.2	0.745083	577
APPL2_GGTGGCTGATAATTACCTCA	49	61	26	12	54	29	18	15	9	30	30.3	0.746375	578
FDPS_GGTGGCTGGGTTCCCTACGG	68	26	19	34	39	37	21	31	0	28	30.3	0.747666	579
CDC42EP3_GTGGCGAAAGTCTCCAAGCG	60	10	0	22	55	51	12	30	64	1	30.5	0.748957	580
NUTF2_TGACGCGTCATGCCTTACGT	298	4	2	0	0	0	0	0	1	0	30.5	0.750249	581
POLR1A_GCTCATAAATATAATCCCAG	158	42	0	0	37	9	0	4	26	29	30.5	0.75154	582
TRA2A_CATATACACCAGAATACCGG	183	27	41	1	11	0	11	0	31	0	30.5	0.752831	583
ZNF223_GATGGATATAGCAACCCAAA	131	53	16	14	45	0	10	1	34	1	30.5	0.754122	584
ATP2A3_CCTACTTACAAAGGAGACAA	175	23	62	30	15	0	0	1	0	0	30.6	0.755414	585
ENTPD2_CGGCCACTTGTAGATAAACA	94	110	1	0	29	0	0	0	44	28	30.6	0.756705	586
UPF1_AGAAGACACCTATTACACGA	223	45	0	1	1	15	1	5	15	0	30.6	0.757996	587
GYG2_CCTTTATAAAAGCGTCCAAG	159	54	14	15	13	1	0	0	0	51	30.7	0.759288	588
HAUS3_CCAGTTATTGAATATGCCAG	136	53	0	1	22	26	1	0	67	1	30.7	0.760579	589
RPL7A_AGAGAGCCATCCTCTATAAG	233	0	2	2	32	7	20	9	1	1	30.7	0.76187	590
SETD8_GGAATCTACAGGAAACGAGA	111	36	16	42	34	21	1	11	6	29	30.7	0.763162	591
SLC39A10_TCTGATGTTAAACTACCGAA	262	30	0	1	10	0	0	2	0	2	30.7	0.764453	592
EPAS1_CCTATTCACCAAGCTAAAGG	170	9	38	2	24	43	1	5	0	16	30.8	0.765744	593
FAM20C_TCTCCAGCGAGTGGGACGAG	57	74	57	17	30	29	23	17	3	1	30.8	0.767036	594
FAAH2_ACTGTGGTGGCATTACTGAA	25	6	104	66	15	40	2	51	0	0	30.9	0.768327	595
RANBP9_TCTTCTATATCAAACACGAA	113	90	63	10	1	4	27	0	1	0	30.9	0.769618	596
USP17L25_GGAGCAAGCTGTCTTGCCAC	213	47	8	0	24	15	2	0	0	0	30.9	0.770909	597
CBWD1_TTAACAGAAGAGAAACCTGA	171	0	0	6	33	56	0	26	16	2	31	0.772201	598
RPL34_TATTGTAGGAAAGCCTACGT	281	1	1	0	11	15	0	0	0	1	31	0.773492	599
Control_CTTTTCAGCTGAGACGTACG	15	0	88	2	0	100	73	0	34	0	31.2	0.774783	600
NDC80_TAATAAATTAACCAAGGACC	199	62	0	15	30	4	0	1	1	0	31.2	0.776075	601
RPS14_GACTGGTGGGATGAAGGTAA	189	59	2	31	27	2	0	0	0	2	31.2	0.777366	602
HIST2H3A_GATCGCGCAGGACTTTAAGA	242	26	0	2	43	0	0	0	0	0	31.3	0.778657	603
LTBP2_CAGGTGGCAGAACTTCCCGG	71	70	12	2	34	52	1	1	69	1	31.3	0.779949	604
MTPAP_TGGTGTGAGAACCTCACGAG	79	103	1	7	15	64	0	0	44	0	31.3	0.78124	605
HCFC1_GTGGAAGTGTACCAACACGC	246	35	24	0	9	0	0	0	0	0	31.4	0.782531	606
RRM1_CTTGTACCCCAATTCCAATG	218	29	0	29	33	0	3	0	2	0	31.4	0.783823	607
PLA2G2F_TCTCGATGGTGTGATCATAG	56	53	32	32	3	60	40	6	33	0	31.5	0.785114	608
TOM1L1_GGTTTACTAGAAACCAACAA	92	32	94	19	19	46	12	0	0	1	31.5	0.786405	609
ATP8B4_TCTCTGGCAGGAATTTGCAG	65	63	2	41	16	55	0	33	41	0	31.6	0.787696	610
LOC102723859_GAAGAAACTAACAAGAAAGA	117	1	21	44	11	67	17	39	0	0	31.7	0.788988	611
LRRC52_TGATACCAGCCCCATTCCAA	163	63	0	0	77	0	7	0	7	0	31.7	0.790279	612
ZNF506_AAAAACCTTTAACTATGAAG	99	24	35	23	10	66	1	7	2	51	31.8	0.79157	613
S100A10_GGACAAAATAATGAAGGACC	134	74	6	24	21	17	0	3	38	2	31.9	0.792862	614
RPS2_ACAGCCGGGTACCTTGAACC	230	86	1	0	1	0	0	0	1	1	32	0.794153	615
ZNF675_ACATGAAAGAAATTATACCA	138	31	31	41	14	46	9	9	1	0	32	0.795444	616
COPB2_GCTAGTCTGTATTGCTACTG	222	57	0	0	1	38	1	0	1	1	32.1	0.796736	617
MAN1A1_CTCAAACCTATATCAAAAGG	129	78	8	25	12	66	1	1	1	0	32.1	0.798027	618
MMP21_AGAGAGAAACCAATATGGAG	65	129	28	25	31	24	8	1	10	0	32.1	0.799318	619
MTA3_AAAACACTATTAGCTGACAA	185	42	1	0	38	9	35	7	4	0	32.1	0.800609	620
UTP15_TACAGCTGACAAATATCACG	130	49	21	5	47	34	1	2	31	1	32.1	0.801901	621
GFI1_CCGGTACATTCTCTAAACGG	141	98	35	0	14	32	1	1	0	0	32.2	0.803192	622
MST1_TGTAGCACCAAGGACCTCCG	209	16	32	0	20	36	8	0	1	0	32.2	0.804483	623
PDPN_GGGAAAATTAAAAAGCACCG	70	60	35	32	29	52	10	11	23	0	32.2	0.805775	624
POLR2J_TCCTAGGATCACCATTAACA	190	57	46	8	14	1	0	5	1	0	32.2	0.807066	625
SMC2_ATTGAATATGAAACCTCCAG	137	86	0	8	32	34	0	6	0	19	32.2	0.808357	626
RAN_GAATTTGAGAAGAAGTATGT	173	90	0	1	21	2	1	2	31	3	32.4	0.809649	627
UGT2A2_GCTGCCGGTACATAGGAGAC	54	83	55	40	34	31	0	18	9	0	32.4	0.81094	628
ISY1_AGGAATATGAAAAGAAACGT	116	81	3	2	41	38	17	2	1	24	32.5	0.812231	629
MGC50722_GGCCCAGGGACTCTTAGAGA	86	11	19	13	32	44	26	14	72	8	32.5	0.813523	630
PHIP_GTTCATTCACCACCAAACGT	191	0	66	1	39	22	0	5	1	0	32.5	0.814814	631
SLC25A13_CCAGCCTAATCCAAAGACTG	156	47	19	15	15	35	0	4	34	0	32.5	0.816105	632
UBXN7_GTGGCCGGAATAGATCTGCA	46	32	84	41	28	39	19	34	1	1	32.5	0.817396	633
CDC5L_ATCCAGAAACAAAACCAGCG	247	41	0	0	18	16	1	1	1	1	32.6	0.818688	634
PDCD7_GGCCGCATCCCCGAGCACGT	136	20	0	1	40	47	2	12	14	54	32.6	0.819979	635
ALYREF_AGACGTGCACTTTGAGCGGA	49	106	58	25	21	1	8	22	0	39	32.9	0.82127	636
FRS2_AAATAATAGTATAAATGTGG	125	14	21	47	26	0	6	7	28	55	32.9	0.822562	637
IFT80_GCATTAGAAAAACCCAACAC	168	28	12	36	43	8	19	0	1	14	32.9	0.823853	638
POLR1A_TATCAAACACAATATTGACG	210	47	63	1	3	0	2	1	1	3	33.1	0.825144	639
BARD1_GCTGTGAAAAGAAATCATAG	128	73	0	0	27	17	0	0	52	35	33.2	0.826436	640
SDHAF3_AGACGCGCTTGTACAATGCC	54	94	0	29	34	13	34	44	17	13	33.2	0.827727	641
SPC25_GGGACTAAGAGATACCTACA	161	13	19	1	45	31	14	0	28	20	33.2	0.829018	642
EIF2S3_TATCACTTACCAATAAGCCG	327	4	0	0	1	0	0	0	1	0	33.3	0.83031	643
TBP_GATAAGAGAGCCACGAACCA	216	54	1	7	36	16	1	0	0	2	33.3	0.831601	644
TTC3_TCTTCTAATTCTCCTAAACC	212	15	0	1	18	27	5	0	0	55	33.3	0.832892	645
GDF10_TCTCATAGAGCCTGTGCATG	26	14	79	63	33	44	0	17	49	9	33.4	0.834183	646
HMGN1_AAAGGGAAAACAGGCCGAAG	166	35	0	3	1	53	1	1	39	36	33.5	0.835475	647
RANBP3_GAGCCCCCCAAAATTAAACG	89	37	27	14	57	69	16	2	23	1	33.5	0.836766	648
AURKA_CCATATAGAAAATAATCCTG	124	66	46	18	10	25	1	5	2	39	33.6	0.838057	649
DUX4_GGGGATCTCCCAACCTGCCC	283	0	2	0	8	42	1	0	0	0	33.6	0.839349	650
USP1_GAAGTTAAACCCATAAACAA	152	91	0	45	18	2	13	0	15	0	33.6	0.84064	651
SCHIP1_TGATAGAGACACTACTGAAG	156	20	1	19	4	5	85	13	0	34	33.7	0.841931	652
BCAP29_TCAAGCAGAAAATACTAACA	169	22	0	42	34	33	14	5	17	2	33.8	0.843223	653
HMGCLL1_TCTCTGGATCGGGGATTCAG	81	75	1	19	45	4	9	14	89	1	33.8	0.844514	654
MIER1_TGATGAACGAACATTAGAAG	190	1	18	19	16	11	53	27	3	0	33.8	0.845805	655
ANKRD13A_TGGGATTTGAAAACATGAGC	143	71	7	0	48	3	1	1	0	65	33.9	0.847096	656
PRKCSH_CCCTCCAACCGGGTCAACGA	160	37	11	68	1	0	27	5	29	1	33.9	0.848388	657
BIRC5_GAACATAAAAAGCATTCGTC	209	76	2	0	16	36	0	0	1	0	34	0.849679	658
CENPW_GAGGAAGCAGATAAAGCGGA	120	12	41	12	33	22	21	7	34	38	34	0.85097	659
NBPF8_ATGGCTATTTGAATAAGTGA	135	49	4	2	11	94	5	1	37	2	34	0.852262	660
RPL12_GACCCCAACGAGATCAAAGT	221	26	29	0	38	26	0	0	0	0	34	0.853553	661
AUNIP_CAGACACATTTAATCAAACC	189	32	32	0	49	33	2	3	0	1	34.1	0.854844	662
FAM98B_ACCCAAGACAACGATTACAA	259	15	2	10	25	8	0	0	1	21	34.1	0.856136	663
RPL10A_TCGCGACACCCTGTACGAGG	234	57	1	0	2	0	0	0	0	47	34.1	0.857427	664
DDX47_ATTCATTTAGAATATAAACC	281	23	0	1	23	0	11	0	1	2	34.2	0.858718	665
HRSP12_TCACAGGCTCTTAAAAACAT	145	89	1	30	27	0	30	9	10	1	34.2	0.86001	666
RAC1_CTGGGCTTATGGGATACAGC	158	108	15	0	35	0	0	1	4	21	34.2	0.861301	667
RPL18_ACAACCTCTTCAACACAACC	323	8	0	0	10	0	1	0	0	0	34.2	0.862592	668
FHAD1_TCATTAAAATCAATTTGGAG	126	42	0	57	17	35	0	52	14	0	34.3	0.863883	669
SLAMF8_CTGGCGACGGGAGACAACCA	130	0	8	38	17	36	1	9	104	0	34.3	0.865175	670
MRPL1_GTCATGTGTTTAGAAAAACG	101	0	1	0	77	88	16	0	1	60	34.4	0.866466	671
TAF1_TCTGGTATATGGACGCTGGG	184	65	1	23	2	27	30	1	0	11	34.4	0.867757	672
TIMM10_CCAGGTACTTAGAGACACAT	242	42	1	0	41	15	0	1	1	1	34.4	0.869049	673
TFDP1_ATGACCAGAAAAACATAAGA	237	31	8	16	24	3	4	21	0	1	34.5	0.87034	674
ZCCHC2_TGCATGACACAGTGTAACGT	157	0	63	40	16	33	0	20	0	16	34.5	0.871631	675
GNGT2_GGAAATCAAGGAGTACGTGG	161	7	20	0	37	47	21	29	1	23	34.6	0.872923	676
TTLL11_TGGCTATATAAATCTCTAAG	167	38	0	57	30	0	10	8	36	0	34.6	0.874214	677
UBA5_CAACTATAATATAACCACAG	179	40	32	9	17	58	0	1	9	1	34.6	0.875505	678
ZC3H15_AGTGAACAAGAAGCACGGTG	190	38	26	33	0	0	0	1	1	57	34.6	0.876797	679
IGSF21_CCAAGCCCAGAACTTCACGC	215	80	0	0	1	47	1	3	0	0	34.7	0.878088	680
CFDP1_AGAAAAAGTTAAAATCACCA	140	85	0	0	22	73	18	8	2	0	34.8	0.879379	681
FANCA_AGACGCATACTGACCACTCG	62	63	22	0	41	76	1	15	68	1	34.9	0.88067	682
LETMD1_AATAACTAATAATTTCTGGG	149	31	2	0	41	54	18	5	12	37	34.9	0.881962	683
OR6B3_CCAGATCTCTAGGAAAGACA	152	41	0	51	0	8	23	2	53	19	34.9	0.883253	684
ATP6V0B_GCCGGTAATATAGATGCCCC	255	76	1	2	15	0	1	0	0	0	35	0.884544	685
GPX4_CTTGGCGGAAAACTCGTGCA	177	121	0	49	1	0	0	0	0	2	35	0.885836	686
RIPPLY2_AGACCCTGGGTGGACGCCGG	113	12	1	5	27	67	68	10	35	12	35	0.887127	687
MAP4_GTGGTCGATCCTATCCAGAC	122	134	11	5	20	48	0	0	11	0	35.1	0.888418	688
PPEF1_AGTCACCATTAAAAACATAC	171	1	18	18	22	29	14	0	16	62	35.1	0.88971	689
LOC113230_TCTCCTCGCGTTCGCAGCTG	53	2	29	0	2	49	88	7	114	8	35.2	0.891001	690
C4orf36_GGAACTTACATTCTGCAGAA	188	1	2	38	25	35	0	17	27	20	35.3	0.892292	691
C8orf44_AGAAGCAGAAAAGGCAAAAG	101	95	21	62	3	12	21	37	0	1	35.3	0.893584	692
NPIPB6_ACAGGTCAGAATGGTGGCAG	81	1	67	17	47	56	32	15	13	24	35.3	0.894875	693
PPIAL4D_GGTGATTTCAAAAAAGACGA	194	56	0	11	18	31	36	2	1	4	35.3	0.896166	694
SLC7A6_TACCCTGGCACAGTTTAACA	149	92	15	41	24	14	15	0	2	1	35.3	0.897457	695
AFAP1_GATGTTTAGAATCCAAACCC	96	146	14	9	27	29	24	0	9	0	35.4	0.898749	696
CDK11B_AAAAGAGAAAAGAGAAACGT	141	64	14	33	31	27	1	1	4	38	35.4	0.90004	697
TOP1_CAAACATAAAGACAGAGACA	109	73	1	0	17	60	72	0	0	22	35.4	0.901331	698
APOLD1_GCTGAGCGAGAGCCCCACGA	122	15	1	13	97	61	17	9	0	21	35.6	0.902623	699
NUP50_TGAAACTTTATCAACCAAGG	162	59	22	19	55	25	2	0	11	1	35.6	0.903914	700
DDX21_CAACATTAAATACCCAATGA	211	59	2	0	29	3	9	8	1	35	35.7	0.905205	701
ERVV-1_CATAAAAATACATAGCCAGG	93	1	45	8	63	33	10	67	2	35	35.7	0.906497	702
STARD4_GGTCTATTATACTATAGACA	125	49	42	46	19	11	1	16	0	48	35.7	0.907788	703
DNAJC28_CTTCAAAACTTAAATAATGT	142	98	0	10	48	55	0	2	0	3	35.8	0.909079	704
METTL15_TATCCTAAGAACATACGGGG	205	57	0	12	31	47	0	4	0	2	35.8	0.91037	705
RPL36A-HNRNPH2_TTAACGTCCCTAAAACCCGC	232	33	7	39	34	1	0	5	6	1	35.8	0.911662	706
NUPR1L_GCCACCCATAAGCTACGAGG	214	53	36	2	38	11	0	4	2	0	36	0.912953	707
PSMD2_CCTGTGGAATGATAGCAGTA	277	65	0	0	4	1	0	2	11	0	36	0.914244	708
ATP1A1_GCAACCAGTTATGATTACAA	214	103	1	18	21	0	1	1	1	1	36.1	0.915536	709
OR5D14_AACAAAAATCAACAAAAGAG	142	114	14	22	12	45	0	1	1	10	36.1	0.916827	710
POLE_GGTTCACGTAGAACACACGG	349	0	2	0	7	0	2	0	1	0	36.1	0.918118	711
PSMC1_AATTTCATCAATAAACACGA	258	1	34	9	29	0	0	0	28	2	36.1	0.91941	712
PTPN11_GATTACTATGACCTGTATGG	178	14	27	51	19	19	37	2	14	0	36.1	0.920701	713
VENTX_AGACGTTGAGTAGAAAGCTG	28	56	54	77	29	39	26	17	24	12	36.2	0.921992	714
FTL_AGACGCCATGAAAGCTGCCA	122	12	53	10	41	77	2	1	45	0	36.3	0.923284	715
MT1B_GGTGGCTCCTGTGCCTGCGC	95	15	5	54	37	33	1	29	93	1	36.3	0.924575	716
OR7D4_GATGAAACAGATGTCAACAA	233	44	3	23	52	0	0	0	7	1	36.3	0.925866	717
TUBB_CCCCACCGGCACCTACCACG	294	1	0	58	2	2	3	0	1	2	36.3	0.927157	718
ZNF713_TCTCCTGTAAGCAACATCTG	3	14	127	2	21	5	119	16	38	18	36.3	0.928449	719
CWC22_GATTATAGTCATCCTCCAGA	199	9	0	47	2	14	28	49	15	1	36.4	0.92974	720
EPSTI1_TGATAGCACCAAATATAAAC	131	14	29	47	26	8	64	31	14	1	36.5	0.931031	721
PYROXD1_AGATTCTATAACCTTAATGT	224	0	13	54	38	23	5	7	1	0	36.5	0.932323	722
TDRD12_TAAACGATTCTACTACAACT	182	42	0	1	0	33	26	17	35	29	36.5	0.933614	723
CBWD5_GGCTGTTGGATCTGTGGATG	177	12	48	9	38	43	1	0	24	14	36.6	0.934905	724
TAF5_TAAGACTAGATAATACTCGT	235	113	1	0	0	1	15	0	0	1	36.6	0.936197	725
RFX7_AGCTGAATCACTGATAACAA	261	39	19	0	22	24	1	1	0	0	36.7	0.937488	726
HSD17B10_CTGGTGGCGGTAATAACCGG	78	43	7	54	61	90	0	0	21	14	36.8	0.938779	727
IL4I1_CGACAAGAACACGTGGACGG	209	69	0	0	1	36	0	45	1	7	36.8	0.940071	728
KCNU1_TCTCTCCTGACTTGTCGCGG	46	92	114	46	7	35	7	20	0	1	36.8	0.941362	729
SEC62_GGTGTTTATTACCTCAGTGT	143	65	0	0	44	50	1	20	1	44	36.8	0.942653	730
ZNF397_TCTCTGATGTTGTGTTAGAG	45	86	120	24	50	21	16	7	0	0	36.9	0.943944	731
EEF1A1_GCACAAATGCTACTGTGTCG	259	37	0	0	12	59	1	1	1	0	37	0.945236	732
STX10_ATTCCTCTCCAAAAATGCTA	269	37	1	3	37	7	0	1	16	0	37.1	0.946527	733
KRT18_GCTGGCTCGGAAGAACCGAG	193	50	3	0	60	15	0	0	2	49	37.2	0.947818	734
PON1_TCTCCCAGGATTGTAAGTAG	45	91	78	1	18	0	101	9	1	28	37.2	0.94911	735
LDLRAD2_TCGCCCACGAAGTCCACGCG	186	7	32	23	82	24	18	0	0	1	37.3	0.950401	736
MOCS3_AATCTCATCTCGGGACAGAG	199	16	86	9	12	11	0	1	19	20	37.3	0.951692	737
PGR_AGACGAAAGTTACGACGGCG	30	124	91	7	0	46	3	0	48	24	37.3	0.952984	738
ADIG_GGAGGCAGAACCAGAAAACC	72	182	28	37	2	8	25	11	8	1	37.4	0.954275	739
RSF1_GGAGTAACTGATTTACACAA	152	57	0	23	27	8	0	22	20	65	37.4	0.955566	740
AKIRIN2_GCCGCAGAAGTATCTCCGAA	220	9	30	6	18	12	59	20	1	0	37.5	0.956857	741
MRFAP1L1_AGACGAGGTGGAAGCGCCTG	42	64	52	41	21	21	95	38	1	0	37.5	0.958149	742
SNRNP48_CCTAGATAGTCTGGATCCCG	165	59	21	27	28	42	0	0	0	33	37.5	0.95944	743
FOXP2_GAAGACAATGGCATTAAACA	187	30	0	31	41	24	11	0	33	19	37.6	0.960731	744
POLR1C_TTCCGATACTCAAAAAGACG	154	38	12	0	65	60	0	1	44	2	37.6	0.962023	745
PPP1R15A_GGAGGAAGAGAATCAAGCCA	129	3	29	3	94	0	9	3	48	58	37.6	0.963314	746
SENP6_GGACAGAAGTCACAAAACAC	187	56	0	0	13	75	2	2	35	6	37.6	0.964605	747
POLR2G_CTGGATAAAGGACAAAGCCT	134	21	73	20	40	32	15	1	1	40	37.7	0.965897	748
PTPDC1_CAGTGACTCAGATTTAAAGA	117	30	10	71	23	53	53	18	1	1	37.7	0.967188	749
THAP10_CCCGCCCCGGCACCTAAGAG	84	138	2	10	64	49	17	5	7	1	37.7	0.968479	750
GRAMD4_GGTTAACTGAAAATATGAGA	147	30	1	45	17	21	17	47	19	34	37.8	0.969771	751
SBNO1_GCAGACCAATTACAACACAC	290	80	0	0	6	0	0	1	1	0	37.8	0.971062	752
SNRNP200_GGGTGCTGGGAAGACCAACG	187	51	1	12	75	42	8	1	1	0	37.8	0.972353	753
GOLGA8R_GTGTAAAGGAGAGTTAGAGA	161	71	64	25	27	4	1	1	0	25	37.9	0.973644	754
STAP1_AAAAAACCTTCAAAGTACAA	170	45	0	2	79	41	19	23	0	0	37.9	0.974936	755
SUMO2_CCTATTGTGAACGACAGGTG	257	43	22	2	50	1	1	2	1	0	37.9	0.976227	756
C19orf53_GGGAGCGATAACACGACCTG	198	20	46	2	1	58	0	28	27	0	38	0.977518	757
HIST1H2BK_CATGGCCTTAGAGGAGATGC	199	22	0	8	70	57	20	2	1	1	38	0.97881	758
NPIPA1_TCCAACCGCCGTAGACAGGA	289	23	1	0	33	3	2	0	28	1	38	0.980101	759
NUFIP2_AGTGTCCCAACCTTAAAACA	157	0	2	41	21	45	0	38	37	39	38	0.981392	760
POTEG_GGGGAGCAGCAAGAGCAACG	194	51	43	0	4	38	2	2	22	24	38	0.982684	761
YRDC_GCCGTGTGAGAGTACCTGAG	196	94	37	17	6	0	20	8	2	0	38	0.983975	762
ATP6V0A1_GTCCAATTATAAGTAAACAT	123	36	87	0	30	20	24	11	9	41	38.1	0.985266	763
FOXD1_GCGGCGGCGCTCGTACGCCG	108	1	33	54	91	54	39	1	0	0	38.1	0.986558	764
NUS1_ATCACCAGGCCCATATGCAC	376	1	0	0	0	2	0	0	2	0	38.1	0.987849	765
PCYT1A_TGAATAAGGAATATCATCAT	218	14	0	46	15	37	2	23	26	0	38.1	0.98914	766
ZNF496_CTGTAGAAACCACTCACCGG	116	37	8	46	44	45	0	20	22	43	38.1	0.990431	767
PABPN1_GCCGGAGCCCGAGCCCGAAG	107	84	18	72	0	7	26	36	32	0	38.2	0.991723	768
RGS13_ATAAGAAAATTGCCTCACGG	145	67	11	0	39	10	1	19	23	67	38.2	0.993014	769
Control_CGTCCCTTCGTCTCTGCTTA	29	22	127	81	5	1	79	36	3	0	38.3	0.994305	770
POLA1_AAGCACGCAATAAAGACAAG	275	14	33	2	56	0	1	0	1	1	38.3	0.995597	771
MEAF6_CGCAGATCCCGGACACCCGG	189	41	0	2	41	27	0	7	67	11	38.5	0.996888	772
TTK_GATGATGGCAAACAACCCAG	236	69	0	2	27	40	9	2	0	0	38.5	0.998179	773
CHMP2A_AGACGCCAGAGGAGCTACTG	91	86	52	40	51	48	16	0	2	0	38.6	0.999471	774
APOL2_ATTGGTACCAAGTCACACAA	222	16	18	0	22	35	7	23	32	12	38.7	1.00076	775
CRELD1_ACCTACCCGAACATACCAGA	156	25	15	13	56	69	1	1	51	0	38.7	1.00205	776
NUDC_GCTGCAGCTAGAGATTGACC	207	53	0	13	41	32	0	0	27	14	38.7	1.00334	777
OR11H1_ACATGGGAGTGTGAAGTCGC	179	27	22	14	57	37	49	1	1	0	38.7	1.00464	778
PSMA6_GATCACACTTATATACCTGA	314	9	0	0	0	63	0	0	1	0	38.7	1.00593	779
RPL13A_TCTTTCTCTAACAGAAAAAG	225	3	0	14	31	33	0	8	19	54	38.7	1.00722	780
SFSWAP_GAAGCGCAGAAAGTCAAACT	160	29	8	68	20	28	12	0	28	34	38.7	1.00851	781
ZNF391_GAAGAAGACTATAAAAACGA	169	72	0	38	0	37	2	13	56	0	38.7	1.0098	782
MTBP_TGGAAACCAATCCTCTGGAA	184	56	35	1	13	54	2	1	41	1	38.8	1.01109	783
TAF2_CAGAGTATGAATCAACACAA	338	35	7	0	6	0	1	0	0	1	38.8	1.01238	784
GEMIN6_GAAGAATGAGTATAAAGGAT	188	94	23	1	41	30	1	0	0	11	38.9	1.01367	785
RAB9B_TGTTACCCAGAACTACAAAG	261	11	1	1	22	79	0	1	12	1	38.9	1.01497	786
SETD9_AATCATTTAAGAATAGAGCC	73	67	58	14	53	55	24	23	11	11	38.9	1.01626	787
TMX2_GGAACTAGAACGGGACAAGA	204	12	1	43	65	47	3	1	10	3	38.9	1.01755	788
TUFT1_GGTGGACACCTGTATAAATG	49	150	36	33	19	12	37	41	12	0	38.9	1.01884	789
TRMT11_CTACCAAAATAAATATTATG	160	0	30	33	22	60	13	18	53	1	39	1.02013	790
BRCA1_AGAAACCTACAACTCATGGA	235	42	1	0	27	67	17	1	1	0	39.1	1.02142	791
C4orf48_CCCGGCACCTACTCTGCGCG	128	52	53	33	12	51	9	23	30	0	39.1	1.02271	792
CDK9_GCGGTTATAGGGGGAAGCTG	114	94	28	42	40	32	11	9	2	19	39.1	1.02401	793
SORBS1_ACCTGGTTAATACTGACAGA	183	36	37	0	14	75	27	0	1	18	39.1	1.0253	794
TFPI_GAAGAACACACAATTATCAC	270	37	2	0	44	29	1	7	0	1	39.1	1.02659	795
CCNA2_GTGGACTGGTTAGTTGAAGT	196	41	19	0	49	7	23	1	0	56	39.2	1.02788	796
HIST1H3D_CCGTTACCGGCCCGGCACGG	80	19	142	59	42	1	0	20	0	29	39.2	1.02917	797
LINGO3_TCTCTAGCGTGTTCACCGAG	35	26	63	14	92	0	102	26	22	12	39.2	1.03046	798
TBC1D3F_GGCATATGAGGAGTACAACC	186	16	38	29	30	32	5	38	18	0	39.2	1.03175	799
CSF1R_ACGCTACCTTCCAAAACACG	230	77	18	1	0	0	1	1	64	1	39.3	1.03304	800
HAPLN4_AGACGATGGTGCCACCACGG	60	102	189	5	2	8	0	1	11	15	39.3	1.03434	801
ARL5B_GAACACAAAGTAATTATAGT	144	61	50	22	45	19	16	26	0	11	39.4	1.03563	802
GML_CAAAACTAATAGCTTCTACT	157	94	21	60	14	45	1	0	1	1	39.4	1.03692	803
ZNF391_GCACAACAGAAAATTCCAAA	87	66	52	0	28	8	50	26	6	71	39.4	1.03821	804
RANGRF_GCCAGGTTCTCCAAACTGAG	201	54	1	1	67	18	3	7	43	0	39.5	1.0395	805
SNRPD3_ACACCGGTGAGGTATATCGG	279	34	2	3	52	0	1	0	3	21	39.5	1.04079	806
YWHAH_GGAACTTGTCAAGCAGAGAC	88	34	46	79	12	23	30	24	38	21	39.5	1.04208	807
NDUFS4_ATATAAAAACTAGAAAAGTC	120	41	11	81	28	29	0	37	34	15	39.6	1.04337	808
PAK1_ATCCTAAGAAGAAATATACA	180	62	21	0	13	57	1	35	16	11	39.6	1.04467	809
SLC35E3_TCTCTGCAGAACAACACCAT	111	94	18	42	24	28	0	19	59	1	39.6	1.04596	810
PRPF18_TGAGCTCGCCAAAAAAGAAG	197	70	79	1	6	1	25	16	0	2	39.7	1.04725	811
RPS9_TGGGCTCCGGAACAAACGTG	292	52	0	12	10	1	21	8	1	0	39.7	1.04854	812
CREG2_CGGTAGGAGAACATCCCGGG	125	58	40	68	28	8	10	34	27	0	39.8	1.04983	813
LRRC66_AGTTCTATCAGGAATTACGG	240	43	15	18	0	43	10	0	0	29	39.8	1.05112	814
NUP54_AGTTCCTTAAAACCCACCAT	194	69	17	0	28	50	0	1	1	38	39.8	1.05241	815
PPP1R32_TGGTGGCGTAGAATTTCAGG	93	55	0	81	42	0	40	28	30	29	39.8	1.05371	816
GNL2_CCTGCAATATCAATCAACGG	258	26	62	1	28	11	1	1	8	3	39.9	1.055	817
HIST1H2AI_GGCAACTATGCGGAGCGGGT	128	73	23	0	29	69	2	0	12	63	39.9	1.05629	818
ZNF75A_AAAGAAAGAAACTTTCAACC	151	132	36	12	33	21	4	1	9	0	39.9	1.05758	819
CCT5_TCAGACAGCAAAAACCACGC	245	60	1	3	27	34	3	1	25	1	40	1.05887	820
CHMP2B_AGAGAAACAAGAAAAACAGC	120	95	39	23	19	61	12	0	2	29	40	1.06016	821
CUL2_GAGCAGCATTCGGATAAGGA	183	51	1	7	44	63	25	17	9	0	40	1.06145	822
IL13RA2_GAACTAAAATACCGAAACAT	204	71	1	0	17	50	31	14	12	0	40	1.06274	823
SEZ6_TTGAGGAATTCCTACAAGAG	137	49	6	25	45	69	1	44	13	11	40	1.06404	824
SKIV2L2_TCTGTGTAAATAACATGACA	286	8	2	3	19	29	29	0	0	24	40	1.06533	825
SPDYE2B_GTCCCCAGCGGAGCACCTCG	266	32	2	2	48	18	0	0	32	0	40	1.06662	826
PURG_GAAAACAGACTATATCGAGA	184	112	0	0	16	25	8	0	38	18	40.1	1.06791	827
C11orf84_TGGTGGTGGCCGTAATTCCG	118	51	59	13	37	0	10	42	51	21	40.2	1.0692	828
ERH_CTGATGTCATATGTGATAGA	191	0	11	47	52	53	0	7	40	1	40.2	1.07049	829
PSMA2_ACTTCGCTCATCATACAGAA	216	39	75	14	32	18	6	0	1	1	40.2	1.07178	830
XPO1_AGTGAGCTCTCAAAAAACGT	326	47	1	0	21	6	0	0	0	1	40.2	1.07307	831
BRF2_AACATATTCCCGAAGCACAG	205	12	18	0	44	50	30	0	43	1	40.3	1.07437	832
IARS_GCTTGTTGACAACTATGTGA	252	37	0	26	18	37	1	6	25	1	40.3	1.07566	833
MTBP_ATATCCGACATATAGCAGGA	258	82	17	14	5	21	2	1	1	2	40.3	1.07695	834
RPL10A_GAAGAACTATGATCCCCAGA	263	51	0	32	3	5	12	4	33	0	40.3	1.07824	835
VANGL1_TCTCGGGACCGGAATTACCA	59	39	60	18	60	24	65	67	1	10	40.3	1.07953	836
BCL10_TCGCCGAATAGATTCAACAA	174	43	0	10	52	95	13	17	0	0	40.4	1.08082	837
CAD_TCCACGGGTATTCAATACAG	131	72	32	0	31	50	0	1	21	66	40.4	1.08211	838
LYST_AGGCTCTCGAGAGATATACA	146	111	0	15	33	44	18	37	0	1	40.5	1.08341	839
NIM1K_CTAAAAAAGAGCATCCTCGA	179	1	36	69	40	11	35	11	0	23	40.5	1.0847	840
TCP1_AACTGGACCAAATTAGACAG	246	48	2	0	40	0	1	16	52	0	40.5	1.08599	841
ACOT13_AGTAGATAACATATCAACAA	231	49	19	29	8	31	38	0	1	0	40.6	1.08728	842
ATP2A2_GTTCAACTCGAGCAAAACAG	238	129	0	6	12	18	0	1	2	0	40.6	1.08857	843
NFAT5_CAAGTCAGTCAAATTCAGAG	171	44	17	69	10	28	13	14	40	0	40.6	1.08986	844
RAB21_AATAGGTAATAAAATAGACT	122	14	57	3	87	40	24	0	43	16	40.6	1.09115	845
RP1L1_CTGTAACCAAGCAAGTGCCG	150	37	87	1	50	59	1	20	0	1	40.6	1.09244	846
TBC1D3C_AAGAAACTAACAAGAAAGAA	189	17	0	15	42	40	1	13	59	30	40.6	1.09374	847
DHFR_CGGCCCGGCAGATACCTGAG	228	56	1	1	65	7	0	0	22	27	40.7	1.09503	848
OR2L8_TGACTCAGTAGGAAATACAT	232	81	1	0	34	1	1	11	0	46	40.7	1.09632	849
PSMD11_CTTTGTACTTTGATACCAAG	183	79	26	35	1	22	1	11	49	0	40.7	1.09761	850
TOPBP1_AAATATGTACAAATGATGGG	216	62	1	23	67	6	0	1	4	27	40.7	1.0989	851
ANAPC13_CCTGAACCTGAACAAGACAA	214	26	1	1	55	33	1	10	67	0	40.8	1.10019	852
ATP2A2_GTACACCAAATAAACCAAGC	281	49	15	5	27	0	0	29	2	0	40.8	1.10148	853
GPS1_ACCTGACGTCAACTACGTGG	212	39	3	0	64	60	0	7	15	8	40.8	1.10278	854
MIEF1_GCGGATCACATAGTCCAAGA	190	1	1	26	43	34	24	16	73	0	40.8	1.10407	855
PSMB2_GAGGAGGTTCACATGATATG	172	169	1	1	8	1	0	17	23	16	40.8	1.10536	856
PSMC5_ACTGGTACAGAAATTCATAG	199	78	36	1	1	29	0	0	63	1	40.8	1.10665	857
SERPINB1_AATGCTGATATCAACAAACG	140	48	96	1	1	59	6	1	36	20	40.8	1.10794	858
TRIM33_CGGGGGCGCAGTATCGACGC	124	9	136	26	7	0	7	11	37	51	40.8	1.10923	859
UXT_GCACTCGGAGTTATATATGC	196	46	23	19	35	68	1	9	1	10	40.8	1.11052	860
HIST1H2BL_GAAGAAGGGCTCCAAGAAGG	158	54	34	11	0	71	0	17	0	64	40.9	1.11181	861
LOXL3_GGACTCTGGGAATATAACAG	112	74	92	61	11	14	12	5	28	0	40.9	1.11311	862
RBM22_AGAAAACCCATATATCCGAA	279	44	20	0	29	10	0	0	27	0	40.9	1.1144	863
C19orf53_GCAGCCTCTGAAAAGAATCG	96	91	40	0	48	23	2	8	83	19	41	1.11569	864
WASH1_GCGCGGCCAGCAGACCTGCA	188	51	3	19	0	48	1	1	81	18	41	1.11698	865
WDR12_CTGGATCAGTTCAATTAAAG	175	39	69	28	17	60	9	1	0	12	41	1.11827	866
BRIX1_ACTAGATCTTTAGTACACCA	280	0	2	0	0	25	1	14	78	11	41.1	1.11956	867
DNAJC19_TCATGGCTTGCAAAACGTAA	158	123	2	64	8	4	0	1	51	0	41.1	1.12085	868
GPHN_ACAGAAATCATCAATTACCG	210	67	11	13	37	33	18	0	0	22	41.1	1.12214	869
MBNL2_TCTCAGGACTGACAAACTGG	87	45	0	38	18	24	30	62	62	45	41.1	1.12344	870
MNT_TCTCCAGTACGTCCATCCAC	22	78	96	53	65	24	50	0	21	2	41.1	1.12473	871
NSMCE4A_TGCCGGTGACAAATTAACAG	98	260	2	13	20	1	0	2	15	0	41.1	1.12602	872
PNLIPRP3_AATCAAGTGCACTTTAGAAG	197	111	0	6	10	25	0	0	1	61	41.1	1.12731	873
VARS2_TAGGAGGCCAAAAGACACGG	151	137	0	28	8	72	0	0	6	9	41.1	1.1286	874
ZNF763_AGACGCATGGTAATGCACAG	102	54	1	11	104	31	91	2	0	16	41.2	1.12989	875
DDX21_CGGGAAGGACTTAATTGCAC	202	30	1	17	69	58	0	36	0	0	41.3	1.13118	876
TMEM42_AGTTGAATACGCCCCAAAAG	73	69	8	27	53	17	20	67	26	53	41.3	1.13248	877
DHX29_ACCAATACACTCTTATATGG	191	16	53	9	53	20	70	1	1	0	41.4	1.13377	878
DPYD_GGAAGGTTATAGTAAAAGGT	119	1	48	38	32	44	1	18	52	61	41.4	1.13506	879
VPS25_GGGGGAAACTCATCTATCAG	133	166	0	10	57	6	6	28	0	8	41.4	1.13635	880
EAF1_CTTATTATTAATCATGACAC	222	43	39	21	0	54	0	1	7	28	41.5	1.13764	881
HIST1H4C_AGTCTCCTCATAGATAAGAC	222	50	0	0	53	61	0	29	0	0	41.5	1.13893	882
TP53I3_GCAACGCTGAAATTCACCAA	146	75	71	1	0	56	66	0	0	1	41.6	1.14022	883
TTLL6_TCACCAGTACATAAATCCGT	267	54	49	3	1	25	16	0	1	0	41.6	1.14151	884
CEBPZ_AAAGCTCCACATATAAATGG	233	127	1	0	30	1	2	0	23	0	41.7	1.14281	885
CENPI_CTATTAAATATTGCACTCAG	208	33	29	27	31	34	0	29	1	25	41.7	1.1441	886
GCM1_AGAACGTGAAAAAAACCGAC	155	55	39	54	57	0	12	0	1	44	41.7	1.14539	887
PCNA_TGGCCAGGTTGCGGTCGCAG	262	79	0	0	15	20	3	2	1	35	41.7	1.14668	888
PTPDC1_GCAGCAATTTGCAAACTAGG	199	97	18	9	78	9	0	0	0	7	41.7	1.14797	889
RPRD1A_AACTTATGAACAGATAAAGG	196	66	1	10	72	37	10	13	0	12	41.7	1.14926	890
SOX1_CAAGAAGGACAAGTACTCGC	286	78	1	8	27	0	0	0	8	9	41.7	1.15055	891
TMTC3_GGGAACATATAATACTCGCT	220	35	7	7	98	38	3	0	0	9	41.7	1.15184	892
ZNF14_ACATGTAATAATACACACTG	239	70	0	2	20	31	3	0	1	51	41.7	1.15314	893
EPRS_AGTAGAGTATAAGCCTGTGT	167	61	1	17	14	20	15	66	10	47	41.8	1.15443	894
CCNJ_CCAGTAAATAGACAGCAAGA	150	70	90	24	20	9	5	48	1	2	41.9	1.15572	895
CHAF1B_ATTGGACAAAAATTCCACGA	195	28	17	6	81	70	11	1	10	0	41.9	1.15701	896
TM9SF2_ACACTTACATAGAGTCACAA	179	117	58	0	35	13	5	0	1	11	41.9	1.1583	897
PRR4_TCTTGGTTACCACTATCACC	198	41	47	15	11	23	32	4	23	26	42	1.15959	898
RHOG_GCTGTAATTGTCGAACACGG	231	7	11	0	41	54	10	19	47	0	42	1.16088	899
SYTL2_CTGGGACATATCAATCACAC	230	142	1	1	7	35	0	0	1	3	42	1.16218	900
LMF1_CCGGCACTCACAGTACACGA	209	16	10	12	47	72	24	23	7	1	42.1	1.16347	901
RPL37A_TCCGGAGGGAGGCCCCATAG	183	94	41	0	28	6	5	14	11	39	42.1	1.16476	902
TGS1_GCAGAATCACATGACAGCAA	207	1	52	66	30	28	5	15	6	11	42.1	1.16605	903
SSU72_GGGTGGAGCCCAACTACCTG	107	86	53	55	13	22	0	29	0	57	42.2	1.16734	904
FBXO8_CATCGTAAACAAGTCCAAGG	229	17	38	7	52	33	7	15	25	1	42.4	1.16863	905
GPR162_GGCGAGCGCTACTATGCCCG	128	159	7	16	38	35	4	10	26	1	42.4	1.16992	906
TEX29_TAGTCACAAATGTCATACAG	192	0	37	20	0	19	41	105	1	9	42.4	1.17121	907
FRRS1_ACCTACCATGAACCTTCAGA	249	35	1	0	29	44	1	31	34	1	42.5	1.17251	908
MSN_GGAACAGCACAAACTCAACA	161	101	69	1	30	5	21	5	17	15	42.5	1.1738	909
C17orf67_CTTCTCTGTCAAAATCGGGG	187	73	1	13	48	41	1	12	39	11	42.6	1.17509	910
C1orf146_AAGAGATGAGCTAATAATAA	153	12	33	21	109	26	10	20	0	42	42.6	1.17638	911
CSNK2B_GATCAATCCATAAAGCATCT	221	30	46	2	54	11	10	21	1	30	42.6	1.17767	912
E4F1_CTGAACAAAATCCTCCAAGG	178	134	20	11	32	0	1	0	40	10	42.6	1.17896	913
GOLGA8N_GAAAGCCGAAAGGGAGCTAG	262	91	0	1	14	43	1	1	1	12	42.6	1.18025	914
THOC1_ACGAGGAAGCTCCAACAACG	263	84	44	0	1	13	20	0	0	1	42.6	1.18154	915
PDAP1_CATCGAGAACCCCAACCGGG	131	66	30	0	23	62	0	26	6	83	42.7	1.18284	916
PIWIL2_CGGAAAACAACATTGTAGAA	127	38	88	39	10	34	3	30	54	4	42.7	1.18413	917
POLR2H_TGTGAAGGATATTGACCCGG	155	52	67	23	37	36	12	22	1	22	42.7	1.18542	918
RBM24_CATACTTAGGAGCAAAACCA	177	38	1	24	18	87	23	5	21	33	42.7	1.18671	919
ADAM9_TGTGGTTTATACTTACAACA	220	0	1	42	31	44	54	18	18	0	42.8	1.188	920
PTPRR_ATGCTGAATTGACAATCTGG	206	100	0	14	63	0	1	42	2	0	42.8	1.18929	921
RPL39_TGAAAACTGGAAATAAAATC	121	177	41	1	49	7	1	1	30	0	42.8	1.19058	922
SNRPD3_CTGGAGCAGGTATACATCCG	229	69	0	26	6	94	0	3	1	0	42.8	1.19188	923
TBX3_ATAAATTTCACAATTCTCGG	169	33	30	22	53	45	22	6	12	36	42.8	1.19317	924
GOLGA8K_CCCTCAGGAGCACCTGGAAG	180	96	33	32	40	16	0	1	31	0	42.9	1.19446	925
PNLIP_GTGGCCAATGACATGCACAT	195	63	0	12	50	25	1	73	1	9	42.9	1.19575	926
FBXW11_AGACTATAGAATCTAACTGG	247	41	0	22	12	43	2	1	62	0	43	1.19704	927
GUCY2C_ACTATAAAGAAACCTTAACC	245	50	32	17	49	17	1	10	3	6	43	1.19833	928
LOC100507462_TGTAGTCCCAGCTACTTGGG	362	14	0	2	1	1	0	0	8	42	43	1.19962	929
NBN_AGCAGCCTCCACAAATTGAA	188	5	32	11	33	37	27	17	78	2	43	1.20091	930
PTPRZ1_ACAACCCAACCGGTATACAA	155	87	11	19	55	10	0	56	0	37	43	1.20221	931
ATP5S_GTGGCGTAAAGAAACTCCCA	109	95	2	33	45	0	39	38	17	53	43.1	1.2035	932
TAS2R14_TGAGAAAATAAAAAGTACCG	86	27	55	58	46	48	34	4	19	54	43.1	1.20479	933
APIP_AAAATACCTATAATACCCTC	197	1	35	13	25	0	0	9	61	91	43.2	1.20608	934
ATP5L2_AGCTCTAGGGATCTCAGCAG	212	91	0	1	27	24	25	0	0	52	43.2	1.20737	935
DYRK1A_TTCAACCAAAATACACCCGA	247	52	44	2	6	32	16	17	1	15	43.2	1.20866	936
ERCC3_CAGTCAAACCCAGCTTACAG	154	70	54	72	26	0	1	31	1	23	43.2	1.20995	937
HMGA1_AAAAGGACGGCACTGAGAAG	116	27	123	22	35	9	40	21	4	35	43.2	1.21124	938
IL23A_CATAAAAAATCAGACCCTGG	128	64	29	38	55	37	15	49	5	12	43.2	1.21254	939
RPSA_CATAAATCTCAAGAGGACCT	291	72	22	0	2	27	1	1	14	2	43.2	1.21383	940
SRFBP1_GAAACCAATACATAATTCAA	180	114	18	2	32	37	0	11	18	20	43.2	1.21512	941
TMEM257_AAAAATCCTAAAATAAAATA	283	61	1	2	20	26	1	21	0	17	43.2	1.21641	942
TOP1MT_GTGGCGACCATCCCAAGATG	108	170	1	25	58	16	5	1	15	33	43.2	1.2177	943
ATRX_ATGATTTAAAGACTCAGGCG	126	60	42	48	46	28	0	1	61	21	43.3	1.21899	944
CYP1A1_GCACTACAAAACCTTTGAGA	276	67	0	0	15	70	4	1	0	0	43.3	1.22028	945
GCSH_GCGCTTACCCGAGAGCAGAG	177	32	19	23	47	78	0	1	23	33	43.3	1.22158	946
OR6C6_AGGTAAAACTCAGTAACTCC	248	42	0	8	28	12	0	0	49	46	43.3	1.22287	947
SPTBN4_AAGGCTACTACGATATCCGG	126	1	37	42	88	92	47	0	0	0	43.3	1.22416	948
TMEM99_AAATGCTCCACAAAAATCCA	146	55	26	49	2	38	6	39	53	19	43.3	1.22545	949
ATP2A2_AGATAACAGAAGTACAACCA	288	129	1	1	1	8	1	0	1	4	43.4	1.22674	950
DDX31_TCTCGTTGGCACGAGCACCA	62	15	2	37	70	114	0	27	19	88	43.4	1.22803	951
MEIG1_CTGTACAGATTTCAACAAGC	125	1	55	36	76	99	0	41	1	0	43.4	1.22932	952
NPVF_GAGATCTGGAAGAAATATGG	140	12	0	29	94	36	42	40	0	41	43.4	1.23061	953
POLR2F_GATGTGTGCCCCTGTGATGG	334	69	0	0	10	13	2	4	1	1	43.4	1.23191	954
TWF1_AACCTGAATAATATATAGCA	125	39	18	1	59	77	45	32	23	15	43.4	1.2332	955
AQP11_GGCTAGAAACTCCAGGACGA	105	54	80	61	15	79	14	23	2	2	43.5	1.23449	956
BUB1B_AGGAATTGAACCCTTGAGCG	170	123	7	33	11	26	1	9	56	1	43.7	1.23578	957
CDCP1_GACGTGTCAGATCATCACAA	213	18	12	77	51	18	10	34	2	2	43.7	1.23707	958
KCNJ1_ACACCTGAATCCATATCCAA	219	85	11	9	51	25	1	31	5	0	43.7	1.23836	959
LBHD1_CTTTGGACTAGAAATAGCCC	128	84	14	19	45	50	8	44	30	15	43.7	1.23965	960
NUTF2_GGGAAGGACAACAGTTCCAG	170	102	2	6	71	69	15	0	2	0	43.7	1.24094	961
HMMR_AACAACTTATTGAATTGACC	170	63	13	0	17	72	23	1	31	48	43.8	1.24224	962
KPNB1_AGCTCCTAGAGACTACAGAC	271	37	25	49	22	0	24	8	1	1	43.8	1.24353	963
SPG7_ACGGAAAACATACCACAGGA	220	14	20	0	64	2	1	26	1	90	43.8	1.24482	964
ZFP69_AATATGATACACCTACAAAG	263	63	33	19	21	8	1	8	0	22	43.8	1.24611	965
ELP3_TCCGAGCCACCAATTCAACC	244	157	1	0	15	13	3	6	0	0	43.9	1.2474	966
MYH7B_CGTTCCCTACACGCACCCGG	217	8	14	35	21	25	66	5	46	2	43.9	1.24869	967
SEC16A_TCCAGCCAGTACGATTATGG	368	15	0	1	1	0	28	4	13	9	43.9	1.24998	968
KCNE2_CACTGTGAAATCCAAGAGAC	131	67	103	2	20	56	11	29	1	20	44	1.25128	969
LIF_ACTTACATAGAGAATAAAGA	202	45	1	7	52	74	15	0	0	44	44	1.25257	970
PPP2R5E_AACTGCTGGAAATATTAGGA	146	70	67	15	10	22	30	33	9	38	44	1.25386	971
SSBP1_TCAGGACCCTGTCTTGAGAC	34	22	77	58	16	51	127	11	0	44	44	1.25515	972
TBC1D3F_GAAATGAAGTTGAAAAACCC	265	90	16	1	6	29	12	1	14	6	44	1.25644	973
TMED6_AGTAATCAGCATAATCACTT	219	4	29	30	9	42	47	60	0	0	44	1.25773	974
MICALCL_AACCAATTCCAATAAAGACG	178	110	23	31	18	21	46	0	12	2	44.1	1.25902	975
TARS_CCTTTGATAGATCTCTGCCG	225	44	0	40	16	60	1	0	0	55	44.1	1.26031	976
ZFYVE9_GGTTTACATTCACCAAAAGG	226	26	1	79	1	26	2	20	4	56	44.1	1.26161	977
NOLC1_CCGGAAGAGTTCTAGCAGTG	104	131	0	38	55	42	7	18	46	1	44.2	1.2629	978
ACVR1B_AAGAGATTATTGGCAAGGGT	85	80	22	15	75	52	24	83	7	0	44.3	1.26419	979
CGGBP1_AGTCAAAGACTCATACCAAG	194	61	33	44	20	26	0	15	35	15	44.3	1.26548	980
COX7B_GGTAATGCTGTATTAGCTAG	222	78	15	39	1	11	1	1	25	50	44.3	1.26677	981
NDUFB11_GGACGAAAACTTGTATGAGA	169	143	21	11	28	3	9	13	15	31	44.3	1.26806	982
TTC37_GGAGAAGCATACTTAAGCAG	218	73	3	2	49	0	3	10	29	56	44.3	1.26935	983
GTF2H2_CATCTACTACCACATAAAGG	352	21	2	1	4	20	2	1	0	41	44.4	1.27064	984
MATR3_AGTTCTTCATTGAATCAACA	240	97	30	44	18	0	0	10	5	0	44.4	1.27194	985
MBIP_AGATAGGAAGAACAGAAATG	172	14	64	32	6	74	1	7	20	54	44.4	1.27323	986
TICRR_ACTGGGTGGATACCACCGAA	214	79	0	7	41	75	21	5	0	2	44.4	1.27452	987
SLC9A2_GGGTAATCCAGCGTAAACAC	203	16	1	25	16	50	1	52	42	39	44.5	1.27581	988
SPANXN3_CATCAATCCAATCCAAAAGG	187	90	16	18	48	18	19	1	48	0	44.5	1.2771	989
COG8_CCATATTACAAAAACCATCG	130	61	36	16	49	48	25	5	43	33	44.6	1.27839	990
ST6GALNAC1_AAATACAGCTTCGAAATAGG	223	44	2	11	27	33	14	43	0	49	44.6	1.27968	991
ZNF766_TCATCATGGAGATAATACTC	252	76	0	0	38	1	38	0	41	0	44.6	1.28098	992
USP17L13_CAGGAACCAAATCATCACAG	194	27	8	5	23	29	34	50	53	24	44.7	1.28227	993
CKLF_AACTGAACACTTACAAGCAA	274	140	1	11	1	0	10	10	0	1	44.8	1.28356	994
CRHR2_GGGCTGCCACAGATACGCAG	214	19	4	13	14	50	1	3	55	75	44.8	1.28485	995
FGF13_CTGCGAGTGGTGGCTATCCA	67	38	37	73	41	102	28	6	16	40	44.8	1.28614	996
HLX_CAAATTCTGCAGATAAAATG	102	19	22	26	61	64	41	8	65	40	44.8	1.28743	997
MASP1_AAGATGCTCAACAATAACAC	219	11	0	92	29	4	30	62	0	1	44.8	1.28872	998
NPM1_TCTTAAGTATATCTGGAAAG	229	54	26	0	35	56	2	1	30	15	44.8	1.29001	999
SERF2_TATGAAAAAGCAGAGCGACT	268	2	0	3	57	88	13	0	0	17	44.8	1.29131	1000
SKIDA1_GAAAATAAGCAGGGTCCGAG	116	19	39	12	44	100	60	16	12	30	44.8	1.2926	1001
TRNT1_TGCTAAACAGAGAATACAAG	246	142	1	0	26	31	0	0	1	1	44.8	1.29389	1002
DNAJB2_CGGGAGATTTACGACCGCTA	131	79	58	47	80	1	0	11	12	30	44.9	1.29518	1003
NCOR1_AAATAATTTGGACAATACTG	192	81	9	22	78	46	1	7	12	1	44.9	1.29647	1004
RPAP1_CCAGCCAAGCTCATGCCCGG	231	88	21	1	54	38	9	5	0	2	44.9	1.29776	1005
SLC38A4_GCAGGTAAGAGAAAATCCAC	147	125	21	25	28	11	49	40	3	0	44.9	1.29905	1006
EFTUD2_GCTTGGCATCCACCTGACGA	259	64	52	25	46	1	1	0	1	1	45	1.30034	1007
MCTP1_GGTGGCACAAGTGCGCCCCG	74	81	1	18	60	106	0	24	44	42	45	1.30164	1008
NPTX2_GCTGCCCGGCGACTTCCGCG	152	87	2	41	36	68	22	35	7	0	45	1.30293	1009
WNT5A_AGTATCAATTCCGACATCGA	208	83	28	1	24	9	2	2	85	8	45	1.30422	1010
CTCF_GAGCAAACTGCGTTATACAG	255	23	47	16	28	39	8	12	20	3	45.1	1.30551	1011
STOML2_GTCTGAGGGGACCCGAGAGT	138	115	18	34	60	1	22	6	31	26	45.1	1.3068	1012
COA7_CGGCTGGTGGACTATTTGGA	186	68	27	30	55	13	34	0	37	2	45.2	1.30809	1013
RPAP2_AATTCCCAAAACTCCAGTAT	153	63	41	56	76	25	0	21	8	9	45.2	1.30938	1014
TBC1D3L_CCTCCTCAGGAAGATAGAGG	219	118	4	62	25	14	2	0	8	0	45.2	1.31068	1015
DYRK3_GGCATCCAAAGATTGCAAGA	116	61	69	49	44	31	4	2	60	17	45.3	1.31197	1016
LRR1_GCTATGAGACTGGCTCATAG	255	46	0	1	34	81	2	21	1	12	45.3	1.31326	1017
RASA1_GGATGGACCAGAATACGAGG	164	83	29	2	94	52	21	0	1	7	45.3	1.31455	1018
SLC18A3_GATCGCCGATAAGTACCCGG	96	1	72	44	33	63	0	60	8	76	45.3	1.31584	1019
MDN1_GTGGCAAAAAGCATAAACCG	307	40	2	13	31	55	5	0	0	1	45.4	1.31713	1020
RPL35_TTACATCTTAGAGAGCTTGG	361	0	0	14	12	9	28	1	20	9	45.4	1.31842	1021
ANKRD32_GCTTATCAGTTCTAACAAGG	225	3	0	86	1	69	21	20	23	7	45.5	1.31971	1022
CASQ1_CTCACAAAGACAATTTGAGA	158	29	24	33	21	41	40	66	3	40	45.5	1.32101	1023
HIATL1_TCTGGAAGCCCAAGCCAAGG	174	62	22	37	31	25	30	36	0	38	45.5	1.3223	1024
NUP93_TAGTAAATTAGCGCCCACAC	267	35	2	1	65	13	26	5	1	40	45.5	1.32359	1025
WNT3_GGATGCGCGCGAGAACAGGC	177	107	43	3	53	22	0	4	46	0	45.5	1.32488	1026
FAM71D_GGCCACCCATTGAGAAAACA	165	84	7	32	37	70	8	0	11	42	45.6	1.32617	1027
ING4_GGCACTACTCATATACTCAG	284	45	43	2	64	12	1	2	2	1	45.6	1.32746	1028
OR5T1_GAAGCTTATTAATATAAACA	164	1	102	58	7	25	38	22	38	1	45.6	1.32875	1029
SIL1_CGAAGAAATACAGTACCTGA	263	90	8	49	19	9	16	1	1	0	45.6	1.33004	1030
TWISTNB_GGGGAAAACTAAATATCACA	155	50	25	20	52	28	17	59	0	50	45.6	1.33134	1031
CENPL_CATTCCTTCTGCATAAACAG	353	38	1	0	15	20	1	0	28	1	45.7	1.33263	1032
DBR1_GTGACGATACTTGGGCGGCA	211	27	2	1	107	34	0	0	46	29	45.7	1.33392	1033
FNTB_AGTAGAAGAAAAGATCCAAG	121	149	19	16	54	26	15	11	10	36	45.7	1.33521	1034
NUP205_CGCCCAGGCAAGTCTAACAG	142	12	1	97	65	37	9	6	64	24	45.7	1.3365	1035
PAQR6_GTTGTCGAACAGGAATGGAT	343	6	34	0	12	22	14	11	14	1	45.7	1.33779	1036
PROX1_GCCTGTACTAGAGAGACCGC	163	126	1	15	9	7	53	1	13	69	45.7	1.33908	1037
TOMM34_CACAGTCTTATAGTCAACAT	193	162	45	1	28	0	26	2	0	0	45.7	1.34038	1038
ATL2_AGAGTATGGAAGACTTGCGA	232	87	59	2	73	1	2	2	0	0	45.8	1.34167	1039
C17orf99_TCTCCCAGAAATTACCCCTG	34	55	11	27	60	104	38	51	4	74	45.8	1.34296	1040
CT45A6_CGAAGGACTGTCACATTCCC	181	129	17	13	41	1	43	4	0	29	45.8	1.34425	1041
CYP4A22_TCCTCATACAGCAAAAAACC	142	113	17	21	44	45	13	25	35	3	45.8	1.34554	1042
HORMAD2_TCTGATAATATGCAGTGACC	170	17	2	39	114	64	31	5	2	14	45.8	1.34683	1043
METTL8_GGAAACAATCCAGTCTCCAT	243	23	13	22	26	50	0	4	0	77	45.8	1.34812	1044
NUP205_CAGTGAAAAACATCGCAAAG	184	124	1	35	13	43	0	0	13	45	45.8	1.34941	1045
PARG_AAGTGAACCCGAGTCACCGA	239	24	9	15	61	0	1	0	106	3	45.8	1.35071	1046
ZNF619_GATATAACTCAAAACTGTCA	172	68	16	65	23	14	40	0	21	39	45.8	1.352	1047
CANT1_GGTGAACGAGAACCCGGAGT	138	84	27	36	52	26	11	0	49	36	45.9	1.35329	1048
EEF1A1_CATCTGATCTATAAATGCGG	386	25	1	0	0	21	0	2	1	23	45.9	1.35458	1049
GATS_AGGTGGCATCCGCCACACTC	99	0	29	36	51	196	47	1	0	0	45.9	1.35587	1050
ATXN7L2_TGGTGACAGAAAGAAGACAT	140	166	0	2	56	44	3	1	1	47	46	1.35716	1051
LRRC37A3_CACTCCAGAACCCACTACGG	178	115	7	14	58	48	9	5	0	26	46	1.35845	1052
TRMT10A_CAAATGGAACCAAACTCAGA	112	25	78	36	34	0	0	36	89	50	46	1.35974	1053
ASPN_TCAAGCATTCGAGTATCAAA	203	57	41	0	11	83	2	22	40	2	46.1	1.36104	1054
MDN1_AGGTGGTAAAGCTATCACGA	278	105	0	0	34	25	17	0	1	1	46.1	1.36233	1055
WNT10B_GCGAATCCACAACAACAGGG	200	63	39	26	32	27	13	5	22	34	46.1	1.36362	1056
HOXB6_CTTCTACCGCGAGAAAGAGT	212	125	1	12	39	1	0	14	44	14	46.2	1.36491	1057
PRPF6_GGACTAAACACTCCATACCC	242	88	15	2	9	57	1	10	27	11	46.2	1.3662	1058
RPS6KA1_AGGGTGGCTTGATCTCACGA	152	58	29	2	46	116	8	8	43	0	46.2	1.36749	1059
SPAG1_CCGAAGCGGGCAGTTCGCCG	122	120	15	21	13	6	80	57	0	28	46.2	1.36878	1060
UTP15_GTGACAGCATAATTATATGG	231	61	53	15	22	27	1	20	0	32	46.2	1.37008	1061
VMP1_AATTCCTAAGCCTATCCAGT	229	132	12	17	27	6	27	11	1	0	46.2	1.37137	1062
CCNA2_GCCTGCGTTCACCATTCATG	258	52	37	46	29	15	21	2	1	2	46.3	1.37266	1063
DCAF4L2_GTAGCTTCCCAGGAATGCGT	243	37	13	42	67	20	0	1	1	39	46.3	1.37395	1064
FAM178A_AGGAAATGGAAGACACACAA	187	96	0	1	101	24	1	30	23	0	46.3	1.37524	1065
KIAA1644_TCATTGCCGAGTAATACAAA	182	8	94	11	40	19	2	56	34	17	46.3	1.37653	1066
RPL36_CGTGCGGGACATGATTCGGG	266	46	2	31	39	45	0	1	32	1	46.3	1.37782	1067
SRSF7_AGGATCTTCGAATTCCACAA	298	47	0	0	33	39	0	1	36	9	46.3	1.37911	1068
EGFL6_CCAATTGCTTCAATACCCAA	130	40	26	85	9	34	12	19	50	59	46.4	1.38041	1069
KIAA0100_TAGTATCTTCAACTTCAAGG	271	7	33	82	20	26	1	3	1	20	46.4	1.3817	1070
NUMBL_GCCTGGAGCGAAAACAGCGA	156	80	1	49	36	38	30	27	36	11	46.4	1.38299	1071
POU3F1_GGCGGCCCGCACCTAGAACA	80	93	36	61	24	8	21	14	60	67	46.4	1.38428	1072
RUVBL1_GTGAACAAGTACATCGACCA	314	2	4	2	66	73	0	0	2	1	46.4	1.38557	1073
WDR44_ACAGATCTGAGCAATATACC	267	53	0	16	8	59	1	0	14	46	46.4	1.38686	1074
WDR5B_GATAGGCTAATCATAATTTG	121	134	46	13	34	17	16	28	7	48	46.4	1.38815	1075
CASP10_GATTATTGATTCAAACCTGG	208	64	2	47	23	51	5	9	28	28	46.5	1.38944	1076
GLA_GTTGGAAATAAAACCTGCGC	158	81	45	40	51	28	58	0	4	0	46.5	1.39074	1077
INTS2_GTACAGACGTAAGAGTGCAC	254	43	40	1	65	5	0	34	2	21	46.5	1.39203	1078
SFXN2_GGGCATGAACATGTTGACAA	242	99	0	2	24	51	1	9	0	37	46.5	1.39332	1079
SRC_TCAATGCAGAGAACCCGAGA	197	12	34	1	49	97	1	45	6	23	46.5	1.39461	1080
TBL1XR1_GCAAGATGTTCCAAGCAACA	178	66	46	18	18	46	1	29	62	1	46.5	1.3959	1081
UFL1_TCTTAATAAAACTTATCTCG	222	66	15	7	25	84	0	2	25	19	46.5	1.39719	1082
AMER1_TCTCAGAGCTTCGACCATGG	82	72	50	20	80	0	50	1	37	74	46.6	1.39848	1083
CABP1_GGCCTTCAGAGAATTCGACA	251	76	36	31	0	17	7	0	10	38	46.6	1.39978	1084
MARS_CAAACGAAATGTTAAACCAG	258	61	12	2	26	73	0	16	16	2	46.6	1.40107	1085
SLU7_TCTGGAGAATGGTACAAGAG	252	29	70	21	0	6	35	21	31	1	46.6	1.40236	1086
TRIM49_CAGACACCGTCCCATTGAGT	264	71	59	12	12	14	2	31	1	0	46.6	1.40365	1087
CASQ2_TAAAGCTATAGGCTTTGTGA	188	145	0	13	26	14	22	17	36	6	46.7	1.40494	1088
EBF1_CCAATAACGGAATTCACTAC	219	75	1	0	27	46	39	1	0	59	46.7	1.40623	1089
LSMEM1_GCTGCGATCCGGCTGGACAG	139	119	71	5	97	32	1	2	0	1	46.7	1.40752	1090
PPIP5K2_CGGTTCAAAATAGCATAACG	235	38	47	42	25	16	3	5	9	47	46.7	1.40881	1091
UBTF_CCAGAAAAAGAAAGATTACG	148	32	61	1	69	73	0	29	11	43	46.7	1.41011	1092
IFT81_TCATCCTGAAGAAACTCACT	179	97	63	43	33	38	2	11	1	1	46.8	1.4114	1093
TAF15_AGGACACAGGAAAGCCAAAG	127	75	2	0	75	110	6	11	1	61	46.8	1.41269	1094
TM6SF1_TCGTCAAAAGAAAACCACCC	266	53	3	1	27	48	1	14	32	23	46.8	1.41398	1095
CDC23_GTTGCCTATCACAATATCAG	251	102	1	3	39	12	15	1	11	34	46.9	1.41527	1096
JPH3_GCAACGGGGCCAAATACGAA	122	118	52	14	66	32	23	0	34	8	46.9	1.41656	1097
RPL17_GAGAATCTACATCTAAACCC	401	16	0	2	2	7	28	1	1	11	46.9	1.41785	1098
XRCC5_AGTAAGAAATATGCTCCCAC	328	23	1	0	37	17	8	20	34	1	46.9	1.41914	1099
PTPN9_TCTCATCGAAGGGATCTGGG	43	48	86	38	3	72	126	53	0	1	47	1.42044	1100
VPS13D_ACATCCGAGAGAATACTCGA	278	143	1	23	0	0	13	0	0	12	47	1.42173	1101
ZNF676_TGGTGGAAGAACCCCCAGGT	100	88	57	16	46	110	29	13	11	0	47	1.42302	1102
BRINP3_TTCTTCGAATAACTGAAACC	182	87	20	2	63	56	22	1	19	19	47.1	1.42431	1103
Control_CTGCACTGTGGAGACGCCCG	47	13	25	142	30	37	66	35	31	45	47.1	1.4256	1104
EFCAB2_CCATGAGTCGAATAATACAG	202	97	65	0	22	65	1	2	15	2	47.1	1.42689	1105
PDSS1_TATACGACATACATTTGGAC	303	7	1	13	105	9	10	2	21	0	47.1	1.42818	1106
SLC12A1_ATGTTGTAAATTCCATACGC	316	11	27	0	50	11	11	8	36	1	47.1	1.42948	1107
SYNCRIP_GATGACAAGAAAAAAAACAG	203	53	31	30	40	47	27	15	8	17	47.1	1.43077	1108
EFTUD1_AGGAATGAAACTGTTAAACC	212	107	10	1	14	1	38	20	58	11	47.2	1.43206	1109
POLR2F_TCACGCAATCTGGAGCGCTC	264	149	0	0	0	23	1	1	13	21	47.2	1.43335	1110
PSMB5_ATCTGTGGCTGGGATAAGAG	214	163	1	0	58	31	0	5	0	0	47.2	1.43464	1111
TXN_CACACTCTGAAGCAACATCC	323	84	1	0	23	40	0	0	1	0	47.2	1.43593	1112
PRX_GGAGTTGGTGGAAATTATCG	81	111	19	11	73	48	53	64	0	13	47.3	1.43722	1113
TRPM7_CAAATATAAGTGCCACCACA	195	62	55	16	40	83	2	20	0	0	47.3	1.43851	1114
CLEC4D_AAAACTACAGCAATAACCGA	175	105	45	31	70	18	1	12	15	2	47.4	1.43981	1115
HSPE1_GCTGCTGAAACTGTAACCAA	335	101	1	0	31	3	2	1	0	0	47.4	1.4411	1116
SCN3A_GTCCCAGATCAAGAACACAT	186	82	30	48	78	37	0	0	0	13	47.4	1.44239	1117
ANP32E_AGTGATAATATAATTTCTGG	205	60	32	60	17	52	17	22	5	5	47.5	1.44368	1118
DIP2A_TGACTGCCTTGGATACAACT	203	78	49	7	82	2	2	51	1	0	47.5	1.44497	1119
ELOVL7_GGAGAAGTAATAAAGCCAGC	163	59	40	20	92	42	28	0	26	5	47.5	1.44626	1120
FAM187B_AATATGGAAATAATGCCCGA	184	142	15	1	50	19	7	1	54	2	47.5	1.44755	1121
FBL_CCAGTCGGGGAAGAATGTGA	160	119	15	0	67	57	0	8	12	37	47.5	1.44884	1122
RPL11_CTCACCTTTGGAAAACACAG	292	131	7	2	24	0	2	0	0	17	47.5	1.45014	1123
SNRPB2_CAGTTCCTTAAATATGACAA	234	89	31	7	14	38	1	16	5	40	47.5	1.45143	1124
CDC42BPG_CCGCAGCTCAGGAATATAGG	238	47	29	20	15	43	48	9	25	2	47.6	1.45272	1125
FTO_AAATCTGCAGACATACACAA	244	62	28	6	48	5	0	36	19	28	47.6	1.45401	1126
GPAM_CAACAGATGAATCCCTACGA	180	52	17	49	13	15	65	25	18	42	47.6	1.4553	1127
POSTN_CAAATACTGGAAACCATCGG	125	50	2	84	61	56	0	75	12	11	47.6	1.45659	1128
SUGP1_TTTGCACGATAAGAATAGCA	214	15	15	1	76	88	0	1	65	1	47.6	1.45788	1129
WDR74_AGGGGATTGGTCTTACCCGT	306	137	1	5	10	0	2	0	5	10	47.6	1.45918	1130
ANP32D_TTATTAAATACAATCAACAT	330	59	41	0	0	47	0	0	0	0	47.7	1.46047	1131
CENPA_GCGGCCGGTTACCTAAGGAG	152	148	0	1	51	53	1	2	68	1	47.7	1.46176	1132
MNAT1_GAGCCAAAAGCAGAGCAACA	185	44	51	20	22	88	2	18	47	0	47.7	1.46305	1133
NVL_TTTCCGATATAAAGACAGCA	177	60	65	2	21	43	27	36	29	17	47.7	1.46434	1134
PRMT9_TTCCAAAACATATTCCCGAA	171	81	11	9	48	45	37	26	26	23	47.7	1.46563	1135
C1QTNF7_GGAAGGCCGATGCGACCATG	166	105	27	3	26	26	28	47	50	0	47.8	1.46692	1136
OR10G3_TGACACAACAGTCAACGAGC	350	50	2	0	10	52	0	1	13	0	47.8	1.46821	1137
PDIA6_GATAAGCATCATTCCCTAGG	226	128	2	0	23	39	1	0	56	3	47.8	1.46951	1138
TMBIM6_GAAACTGAACAGAAAAGACT	145	102	8	35	99	18	39	30	1	1	47.8	1.4708	1139
ARL5B_CACATATTACTCAAATACAG	185	45	17	38	25	18	22	25	57	47	47.9	1.47209	1140
COL22A1_AGACGCGCTCCGCTACATCA	92	16	106	56	30	82	1	11	45	40	47.9	1.47338	1141
CYP4A22_AACACGACCAGGAGCTACAA	192	83	80	21	26	9	0	39	29	0	47.9	1.47467	1142
MCM4_GGAAACCAGACATTTATGAG	150	132	2	1	35	105	1	2	32	19	47.9	1.47596	1143
SIX6_GGAAAACCACAAGTTCACCA	240	33	48	65	4	1	1	11	76	0	47.9	1.47725	1144
SNRPA1_AAATCCAGTACTCTGACTTG	297	13	24	12	44	34	0	0	37	18	47.9	1.47854	1145
WASH1_GGTGGTGTTGAAGAGCAGCA	346	108	1	2	0	1	0	0	1	20	47.9	1.47984	1146
GLTSCR2_GGCCCAAGAAATAAGAAGCG	100	108	7	49	24	70	63	36	22	1	48	1.48113	1147
RSRC2_GAAGCAGGGAAAGAAAACGG	129	67	47	33	74	27	17	23	62	1	48	1.48242	1148
ACLY_GCCAGCGGGAGCACATCGGT	198	35	17	32	128	16	1	2	51	1	48.1	1.48371	1149
ADH5_TGGGTTTACTAAAATCCTGA	222	22	104	16	35	5	0	25	50	2	48.1	1.485	1150
ATP5H_GGATAAATATACTGCCCAGG	106	128	30	39	92	54	12	15	0	5	48.1	1.48629	1151
CENPI_CAAGTGTTCTGGTAGCACCA	314	40	0	0	33	11	1	0	44	38	48.1	1.48758	1152
CTAGE9_GTTAGGAGTCGGCTTTATGT	271	72	1	0	28	36	1	1	71	0	48.1	1.48888	1153
DCTN6_AGAAATGTAATATTGACAAG	217	101	0	29	63	0	1	1	68	1	48.1	1.49017	1154
EMC7_TTCTCCGTCTACCAGCACTC	354	79	0	0	17	9	0	1	21	0	48.1	1.49146	1155
HIST1H2BE_TAGAGGAGATGCCGGTGTCG	146	65	2	84	49	69	1	28	37	0	48.1	1.49275	1156
LOC100507462_TCGCCCAAGCTAGAGTGCAG	425	12	5	2	14	1	0	1	0	21	48.1	1.49404	1157
RNF17_AGAAATTATTGAAGACAACG	162	52	7	28	31	97	33	38	1	32	48.1	1.49533	1158
RPS21_AGGTTGACAAGGTCACAGGC	205	128	18	18	83	25	0	2	1	1	48.1	1.49662	1159
DHX8_TAGACGGCGAAATCTTGTCG	249	59	0	18	9	42	2	13	57	33	48.2	1.49791	1160
NUP85_CAATAAAAAGAATCTCACAC	229	148	0	10	43	1	8	1	1	41	48.2	1.49921	1161
C2CD2L_AGACCAATCTGAGCATACCA	288	2	1	86	0	62	40	2	1	1	48.3	1.5005	1162
FTSJ2_CCCCACAGTCTAACACCCGA	202	50	51	32	1	36	57	31	22	1	48.3	1.50179	1163
PPP6C_CAGTTCTGAACAGTTCACAA	217	47	0	2	67	30	0	0	103	17	48.3	1.50308	1164
RHBG_GCCTGTACAGAACCCGCGAA	243	49	17	1	41	54	0	7	0	71	48.3	1.50437	1165
GRP_AATGGGGAAAAAGAGCACAG	176	65	57	5	64	47	8	10	19	33	48.4	1.50566	1166
L3HYPDH_CCCGCCAGCACGATACGCAA	298	14	44	1	44	19	42	1	19	2	48.4	1.50695	1167
ZNF131_GAACTCAATTAAATGGCGAA	193	67	30	3	39	86	11	4	31	20	48.4	1.50824	1168
CDC25B_CGCCCGTGCAGAATAAGCGG	144	56	51	75	15	66	1	41	0	36	48.5	1.50954	1169
DNAJC9_GCCCAGCACCCGGTAAAGGT	143	105	0	1	84	40	15	0	42	55	48.5	1.51083	1170
EMC7_CGAAGTGATATCCACTCGAA	172	90	120	3	24	1	29	15	17	14	48.5	1.51212	1171
MICAL2_TCAGAAGAAAAGAATTCCGT	146	71	20	80	50	67	28	0	23	0	48.5	1.51341	1172
SPRED2_CTGTGGGGTATGAGTCGTGG	142	76	70	2	45	72	20	14	29	15	48.5	1.5147	1173
TOPAZ1_GCCATGCTTTCATAACCTAA	254	6	66	23	14	2	54	19	19	28	48.5	1.51599	1174
C9orf64_TACAGAGGGAAAACATACAG	176	78	75	23	50	58	5	5	15	1	48.6	1.51728	1175
HDGFRP3_CAGAGCTCTTCAGAAACTGA	241	53	11	1	33	40	33	37	1	36	48.6	1.51858	1176
MPST_CTGGTCGATGTCGAAGAAAG	191	67	19	1	89	59	12	0	31	17	48.6	1.51987	1177
MS4A8_CATTCGACACCAAACTAGGT	218	79	0	9	17	118	0	34	10	1	48.6	1.52116	1178
NBEAL2_AGACGTAACAGCAGTATGGG	43	97	49	39	84	47	48	55	1	23	48.6	1.52245	1179
NDUFA4_CAGTTCCAATAAATACAAAG	271	40	39	27	43	4	0	14	35	13	48.6	1.52374	1180
PTPN20_CGTTCCTCTTGGAAAAAGCA	183	138	21	25	50	50	17	1	0	1	48.6	1.52503	1181
TAS2R60_CCAGGTAGAGGACCATAAGG	205	98	2	44	48	27	9	8	0	45	48.6	1.52632	1182
DERL2_TGGCCCAAAAAATAAGAAGT	78	137	0	82	60	89	21	1	3	16	48.7	1.52761	1183
FGF3_GGCGGCGTCTACGAGCACCT	164	1	31	49	79	36	15	26	16	70	48.7	1.52891	1184
FTSJ2_TCTCAGGGACCCATTTGTGA	15	66	126	30	17	6	140	73	0	14	48.7	1.5302	1185
IQCB1_ATGCTCGAAATAGTTCATCC	221	121	2	1	22	71	0	12	14	23	48.7	1.53149	1186
KLF2_TCGGGGTAATAGAACGCAGG	151	121	67	23	33	39	13	16	1	23	48.7	1.53278	1187
LRRC37A3_ACCTCCCTAGAAGACTCAGA	286	20	103	0	23	24	9	0	0	22	48.7	1.53407	1188
PRR4_CAGAGACCACCAAAACCAGG	145	106	39	11	44	60	12	38	18	14	48.7	1.53536	1189
DHX8_CCCAGGTCGAACATATCCAG	272	102	1	2	0	66	35	2	7	1	48.8	1.53665	1190
RANBP2_TGTGAACATCCGGCTAGTGG	194	53	38	14	22	32	0	65	33	37	48.8	1.53795	1191
RPL4_GAAAAATAGATGTGTCGTGG	322	64	0	13	29	1	9	11	37	2	48.8	1.53924	1192
SFMBT1_TCTCCGCTATGATGGCTATG	43	76	132	7	56	60	7	20	30	57	48.8	1.54053	1193
ALS2_TAGGTGGCATCCTTTAGGCG	123	77	13	39	45	31	53	75	33	0	48.9	1.54182	1194
FETUB_ACGACGCCCAGGAATACAGA	157	56	44	33	47	25	36	9	65	17	48.9	1.54311	1195
NUDT9_TGGAGAATGGGCAATCCCAG	106	129	59	108	1	23	22	20	2	19	48.9	1.5444	1196
RAB21_GTTCACTTACCCATATGGCA	217	137	19	13	69	25	0	9	0	0	48.9	1.54569	1197
ATP6V1C1_ATCAACTGCCTTCCTAAACA	304	39	1	1	35	19	20	21	0	50	49	1.54698	1198
GTF2E1_TGAGAGAGATTCGACCAACC	261	31	2	9	61	46	1	1	73	5	49	1.54828	1199
NOM1_CCATTTATACAACTTCCACG	215	103	42	0	45	6	0	12	66	1	49	1.54957	1200
SEPW1_CATCACTTCAAAGAACCCGG	185	89	6	50	21	48	13	10	40	28	49	1.55086	1201
MAP4_GGCACTAGCTACAAAAACCG	154	80	74	58	37	24	16	23	24	1	49.1	1.55215	1202
NSMCE2_GCAACTAAACCATTATGTAA	254	75	1	6	29	61	0	32	32	1	49.1	1.55344	1203
SLC25A40_GCAGGTAAAATAAATAACTG	106	114	52	2	59	62	5	0	33	58	49.1	1.55473	1204
ACER3_TATTAAACTGAATAGAACTA	227	41	95	1	13	0	88	21	1	5	49.2	1.55602	1205
C12orf74_AGGAGCCTGCCAAAGAACCA	86	97	1	21	35	107	45	41	21	38	49.2	1.55731	1206
CUL4A_TCTCGCGCTCGATCAGCAGT	29	18	113	74	0	26	125	70	35	2	49.2	1.55861	1207
LSM6_GACTTCTTAAAGCAAATCAT	216	94	13	1	56	74	8	0	28	2	49.2	1.5599	1208
USF2_CCACGACAAGGGACCCGAGG	152	48	81	29	49	0	1	83	48	1	49.2	1.56119	1209
C9orf9_GGAACATGAGCAGAACCCGC	182	158	28	1	23	22	21	41	2	15	49.3	1.56248	1210
EIF1_CGATAAAAAGAAACTAGTGA	300	60	28	1	16	54	0	1	32	1	49.3	1.56377	1211
FAM195A_GACCCAGGAGACCTACACAG	190	75	28	28	53	96	0	12	9	2	49.3	1.56506	1212
NDUFA2_CGGGCGAGCGCTGACATAAG	111	151	75	15	0	64	21	30	24	2	49.3	1.56635	1213
SLC39A1_CCTAGTAAGCTGTTTCGCGG	304	31	10	47	11	59	27	0	4	0	49.3	1.56765	1214
AMOTL1_GCAGCCTCAGCAGAACAACG	223	55	1	66	12	50	2	2	33	50	49.4	1.56894	1215
CHGA_GGCTACAAGGAGATCCGGAA	184	175	0	16	80	1	16	22	0	0	49.4	1.57023	1216
PCDHAC2_CTTTGGAAACTCCTATACAC	202	1	60	17	40	89	32	10	41	2	49.4	1.57152	1217
SHQ1_ACTATAAAGATATTGCAACT	286	0	22	8	35	60	1	0	29	53	49.4	1.57281	1218
SMC4_CATTGATGAAAAATACGACG	231	121	19	1	5	36	45	1	34	1	49.4	1.5741	1219
ZEB2_ACTTAAATTACTATTCATGG	188	26	67	2	43	73	34	4	40	17	49.4	1.57539	1220
TPTE2_ATATTTCGGAGGCAATAAGG	263	116	14	0	43	9	24	11	1	14	49.5	1.57668	1221
FADS3_GCCAGCTCTCCAATCAACAG	223	1	32	14	32	59	85	14	10	26	49.6	1.57798	1222
NTNG2_GCACCGAGGAGTACTCGCGC	217	22	0	63	77	68	8	17	21	3	49.6	1.57927	1223
SAT1_AAAGAGCACTGGACTCCGGA	130	65	32	23	94	15	19	46	14	58	49.6	1.58056	1224
SLA_AGACGGGTAGTCACTTAGCA	18	62	42	55	9	69	142	78	16	5	49.6	1.58185	1225
ZNF680_AAGGATTGAGAATAAACTAA	107	20	62	25	60	64	60	35	10	53	49.6	1.58314	1226
B3GNT3_GCTGCGTGGCGAAGTCCGGG	177	87	60	1	44	41	58	0	0	29	49.7	1.58443	1227
CRIP3_TGTTACTTACCAAAATAGAC	271	55	45	3	8	43	23	7	42	0	49.7	1.58572	1228
NCKAP1L_CAAAGTGAGCACAAATCAGG	201	113	48	4	39	37	0	18	21	16	49.7	1.58701	1229
TLCD2_CGGGTGGCCATGGATGGGGT	156	105	39	0	21	45	8	26	87	10	49.7	1.58831	1230
TMC4_TGGGGGTTATAGGAGCCGCA	124	47	30	16	100	47	31	22	43	37	49.7	1.5896	1231
FMO1_AATTTCCCATTCCAATCACA	227	51	15	36	78	64	13	13	1	0	49.8	1.59089	1232
KNSTRN_AGGTAAGAGACTCTTAGAAG	142	64	2	19	23	60	24	6	59	99	49.8	1.59218	1233
MS4A15_GGCATCTTCTTCATCGAGGG	186	8	44	0	73	36	7	31	70	43	49.8	1.59347	1234
NYAP1_CTTGACCGCCGAGTACACCA	264	30	17	1	75	41	32	8	30	0	49.8	1.59476	1235
TLCD1_GTCAGGAGTCTGCCATACAC	268	0	26	72	25	20	78	0	0	9	49.8	1.59605	1236
ERVV-1_GAAAAGAGCTAATCACATGG	198	71	22	6	45	40	22	47	40	8	49.9	1.59735	1237
RELL1_GACCCATGATAAAGAACACA	227	8	17	19	14	21	1	5	121	66	49.9	1.59864	1238
RPL12_GATAACGTACCAGACCCAGG	267	65	73	9	19	0	57	4	3	2	49.9	1.59993	1239
BET1L_AGACCGGGAGAACAAGCGAA	149	76	43	1	51	89	40	19	32	0	50	1.60122	1240
EGR4_CGGGTTCGGAAAACTCGCTA	106	30	78	1	24	52	26	20	54	109	50	1.60251	1241
HTR1B_CAGCTAAAAGGACTCCCAAG	161	72	16	12	55	28	11	15	51	79	50	1.6038	1242
PPIAL4E_CCAGGGTTTATGTGTCAGGG	319	110	0	2	19	14	1	0	28	7	50	1.60509	1243
RAD1_AAATGGTATCAAAGTAACAG	223	129	0	1	56	87	1	0	2	1	50	1.60638	1244
BIRC5_ATGCGGTGGTCCTTGAGAAA	197	63	27	36	49	44	1	0	41	43	50.1	1.60768	1245
GPR84_CTTGGGGAAAAAGCTTAGGG	106	100	51	13	75	45	19	12	79	1	50.1	1.60897	1246
HIST1H2BM_CCCTAAAAAAGGCTCCAAGA	131	66	21	11	87	140	22	11	1	11	50.1	1.61026	1247
LRRFIP1_TAGATCCAGAAGAAACACAT	337	58	0	27	42	0	19	14	3	1	50.1	1.61155	1248
MFAP1_TCTGTAAACGCCGTAGCCGG	215	36	28	2	58	30	14	16	38	64	50.1	1.61284	1249
RARS_GAAAAGTCAACTATAACCTG	224	79	15	32	51	64	24	12	0	0	50.1	1.61413	1250
ZFC3H1_CATTTGAATTAAAACCACTC	211	52	57	33	21	39	8	26	53	1	50.1	1.61542	1251
Control_TCTCGTAGCCTAATGCGCCA	118	16	63	97	21	47	64	60	15	1	50.2	1.61671	1252
HAUS3_CAGGCAAGCCTATTCTAGAA	152	239	2	14	8	21	0	13	53	0	50.2	1.61801	1253
ARFRP1_GATTTAACAAGAACTACAAG	259	138	10	0	22	11	14	9	0	40	50.3	1.6193	1254
NOP58_GTTGTTAATGAACTTATGAG	268	88	1	9	32	50	3	1	0	51	50.3	1.62059	1255
PLEKHH2_TCTACACTAAAGCTTTCGGA	198	140	26	0	40	17	36	8	37	1	50.3	1.62188	1256
RFC1_GGAGTTGGGATACAGCTACG	244	185	0	1	30	40	0	1	0	2	50.3	1.62317	1257
RPL12_TCTTCTGCAGTTAAACACAG	267	78	3	36	36	78	0	2	2	1	50.3	1.62446	1258
SLC4A7_TCGAACAAGAGGAATCCGAC	237	93	27	24	8	19	80	1	0	14	50.3	1.62575	1259
WRAP73_TGGCACTGCAAAATAGACGA	291	92	1	45	52	6	2	12	1	1	50.3	1.62705	1260
COPG2_ACTGGAAACTTTATCCACAA	128	39	55	34	69	47	25	27	52	28	50.4	1.62834	1261
DICER1_TCAGCTACATAAAATCGATG	259	137	1	3	38	25	29	1	10	1	50.4	1.62963	1262
GLRX3_TCTCCAGAAACATAGAGCTG	50	169	54	91	51	60	1	10	0	18	50.4	1.63092	1263
OR8U1_TTACAACCATATACAATAGA	331	31	60	1	45	2	8	0	1	25	50.4	1.63221	1264
PRPF38A_GAATCTATGAGTCCAAGTAC	348	17	30	1	22	18	34	21	1	12	50.4	1.6335	1265
PSMA4_ATACCAAGTTGAATATGCCA	473	23	1	2	0	0	1	1	1	2	50.4	1.63479	1266
RILPL1_ACGCGACGAGATCCGCGCCA	163	69	23	0	41	14	71	26	33	64	50.4	1.63608	1267
SPATC1L_CGTCACGCCCGGGAACACGT	279	18	90	63	18	3	1	12	20	0	50.4	1.63738	1268
ACTRT3_AATGTTCGGGTAGATAAACT	143	63	52	47	39	44	0	22	53	42	50.5	1.63867	1269
CDC7_GGCCAAACCAAAGTCTACCA	198	75	85	53	12	50	9	4	17	2	50.5	1.63996	1270
EPB41_AGTTAACAGAAGACATAACA	230	38	75	4	60	18	23	27	15	15	50.5	1.64125	1271
RNF167_CCTACACATGACTATCAGAA	253	89	17	14	57	13	9	1	10	42	50.5	1.64254	1272
SRSF3_GCAACCCACACACTTCGGAG	362	114	1	0	0	26	1	1	0	0	50.5	1.64383	1273
ZC3H11A_TCCTGGCTGAAAAAAAACAT	250	58	0	1	67	42	1	0	51	35	50.5	1.64512	1274
CXorf49B_TGAGAATTGGGCAGATGCGG	204	57	1	3	39	86	24	9	83	0	50.6	1.64641	1275
DHX15_TGGGTCTGGTAAAACAACAC	264	100	1	52	31	8	2	0	47	1	50.6	1.64771	1276
EEF1A1_TGCTCCAGTCAACGTTACAA	375	121	2	2	1	1	2	1	0	1	50.6	1.649	1277
ESM1_CTGGAGCAATAATTATGCGG	155	75	30	14	60	87	24	7	39	15	50.6	1.65029	1278
GMPPB_GTGTCCAATAAGATCAACGC	255	131	1	1	23	31	20	3	40	1	50.6	1.65158	1279
NT5C1B-RDH14_GTCAATGGTCTAGAATATCC	337	87	19	1	20	19	2	19	2	0	50.6	1.65287	1280
PPM1D_ATAGCTCCACAAATCACCTG	205	64	47	30	35	10	39	14	19	43	50.6	1.65416	1281
SLC26A4_GTAAACACCCAGATAACCTA	201	24	98	13	15	0	53	63	15	24	50.6	1.65545	1282
ASXL2_TGGGCAGCCTGACTGCGGGG	200	40	46	20	9	74	1	36	14	67	50.7	1.65675	1283
DDX21_GATGTCATCCGAGTATATAG	224	82	33	0	51	85	3	0	13	16	50.7	1.65804	1284
NOX1_CATTCATATCCGAGCAGCAG	231	77	42	50	44	43	19	0	1	0	50.7	1.65933	1285
SKIL_TCCCAGTTTGAAACACACAT	212	77	48	37	16	33	1	13	34	36	50.7	1.66062	1286
SMG1_CGTGTTCAACTAGTGCACAG	427	12	1	16	0	1	1	8	38	3	50.7	1.66191	1287
TAF7L_GGAAAAAAGCAGCTTTACTG	236	160	2	15	19	11	0	9	55	0	50.7	1.6632	1288
GOLGA6A_GGCTACGCAAACAGGAGGAG	190	108	53	0	89	36	0	1	13	18	50.8	1.66449	1289
IGBP1_AAAGACAGGCTAAAATACAG	458	20	2	0	9	16	1	0	1	1	50.8	1.66578	1290
TIMM23_AGCGGCAACAAAACCACAGG	242	32	26	38	29	31	24	0	26	60	50.8	1.66708	1291
TXN2_GGTGGCCAAGCAGCACGGGA	113	86	128	28	47	66	0	14	3	23	50.8	1.66837	1292
OR8D2_CTGAGAAAATAATACACTGG	152	14	25	75	40	82	28	42	12	39	50.9	1.66966	1293
PPWD1_AGTTTGTCAAAAATATGAAG	249	121	23	12	27	43	0	1	25	8	50.9	1.67095	1294
POLD2_TGTATGTATTTACTCCGAGG	230	63	15	22	58	61	24	3	21	13	51	1.67224	1295
SUDS3_CTGACAATGGAACTGACTGG	336	70	1	10	32	36	0	15	8	2	51	1.67353	1296
USP17L29_TGACGTGGCCAGGATTGTGG	308	47	10	50	27	0	2	0	11	55	51	1.67482	1297
ABCE1_TTTCAGATATATCATTGTGG	231	95	2	1	24	89	41	22	6	0	51.1	1.67611	1298
CLEC2B_GGAAACCAATCCAATCATAG	203	43	29	42	63	13	24	40	8	46	51.1	1.67741	1299
KPNA1_TCCACCTCCAGAATTTGCAA	196	128	0	70	44	1	1	3	21	47	51.1	1.6787	1300
PRPF40A_TGAAACCAAACAGTCTACCT	244	96	49	20	20	31	0	0	10	41	51.1	1.67999	1301
RNF130_CCACCGAAGAACTTCAGCCG	130	42	22	75	60	118	7	17	1	39	51.1	1.68128	1302
VHL_CGCCGCATCCACAGCTACCG	298	159	0	0	25	9	1	1	1	17	51.1	1.68257	1303
AGL_ATGCGTAATATCCATAAACA	273	31	33	19	37	8	1	19	49	42	51.2	1.68386	1304
EIF1AY_GGAGGTAAAAACAGGCGCAG	98	41	91	57	45	71	47	38	0	24	51.2	1.68515	1305
GPBP1L1_CAGAGGAATTATGTCGACGG	199	56	1	17	95	49	20	24	39	12	51.2	1.68645	1306
HJURP_TCCAGACCAACAATACGACA	313	48	98	2	50	0	1	0	0	0	51.2	1.68774	1307
IFIT5_AGAAGTATACAGGTAAGATA	157	51	14	36	61	29	22	33	67	42	51.2	1.68903	1308
MVK_GACCTCAGCTTACCCAACAT	270	97	3	9	19	24	0	26	8	56	51.2	1.69032	1309
PPAN-P2RY11_TCAGAAAGTGTGTGACCCCG	281	100	1	11	25	55	0	0	15	24	51.2	1.69161	1310
UBE2Z_AGTGTCTACTCCGGATCAAG	169	62	107	8	61	66	25	0	12	2	51.2	1.6929	1311
USP17L30_TGTTTGTCTCCAGAGGGCGC	280	43	2	15	37	83	0	51	0	1	51.2	1.69419	1312
ETF1_TGGCTCCCAGGACTGAAAGG	330	129	18	16	1	1	0	14	2	2	51.3	1.69548	1313
GSS_AGATATCTTCAAATGTTCGT	186	117	33	15	19	52	27	0	63	1	51.3	1.69678	1314
NLRP8_AATATACCGGACGAACACAG	261	5	57	92	40	16	17	12	2	11	51.3	1.69807	1315
SLC44A2_GATAATCCAGTACCAAGAGA	195	82	7	30	3	66	53	12	28	37	51.3	1.69936	1316
SPC24_CGGCTGCTGGAAACGCAAGA	299	82	38	4	9	0	3	28	39	11	51.3	1.70065	1317
BTG3_GGATCCTGAATGATAATCAG	237	27	72	9	40	53	42	1	14	19	51.4	1.70194	1318
TSPAN6_GGTGCCCAAAAGAATAATGA	160	107	74	3	44	46	8	31	25	16	51.4	1.70323	1319
DRAM2_CGTTATCATCAAATTAAACA	211	106	1	43	41	27	2	18	11	55	51.5	1.70452	1320
UBQLN1_GCAACCTAGAAAGCATCCCA	293	40	52	40	39	28	13	3	0	7	51.5	1.70581	1321
CEP89_TGAGTTCTACATTCAAACGA	179	59	11	15	36	21	82	65	0	48	51.6	1.70711	1322
FAXDC2_TCTTGTTCTACTATTCACAC	282	33	7	0	51	66	22	23	1	31	51.6	1.7084	1323
SDAD1_CCCAAGAAAGAATGTCAAAG	152	118	40	44	44	38	17	24	5	34	51.6	1.70969	1324
BCAS1_GGCAGAGCATCAAGACAAGG	181	52	24	56	31	61	0	39	2	71	51.7	1.71098	1325
C12orf45_TCATAGTAAAGTTATACAAA	231	14	20	14	57	73	30	17	58	3	51.7	1.71227	1326
CDC45_CAATGTATACAACGATACCC	295	50	57	2	8	56	1	3	2	43	51.7	1.71356	1327
KRTAP8-1_CAGCCAACGCTATATCCCAG	106	119	51	23	49	15	70	78	1	5	51.7	1.71485	1328
TCP1_GATGTAACCATTACTAACGA	411	27	16	2	6	1	19	4	14	17	51.7	1.71615	1329
EIF2B5_TCCCGGCACAACATCTACCG	346	167	1	0	0	1	1	1	0	1	51.8	1.71744	1330
LOC101927844_CAAATGCTTGGAAGGAAAGA	110	90	98	14	47	66	30	55	1	7	51.8	1.71873	1331
NFS1_GCTTGCACATCCATATAGAG	420	57	1	0	1	17	1	1	18	2	51.8	1.72002	1332
TOR1A_ATCGCAGAGAATATTTACGA	178	65	16	103	1	41	51	24	11	28	51.8	1.72131	1333
DERL1_ACCCACAGGGAAATAAAAGG	144	118	3	36	8	5	75	49	33	48	51.9	1.7226	1334
DNAI2_AGAGTATTTCAATGACGAGG	166	105	31	46	34	45	24	23	43	2	51.9	1.72389	1335
KRTAP4-5_TGGGCTGGTAGCACACAGAC	334	1	20	0	69	47	44	1	2	1	51.9	1.72518	1336
POLR3A_ACCAACTCAACAGCTAACCG	243	151	0	0	6	64	0	0	52	3	51.9	1.72648	1337
RPS20_GTGGTGAAGGTTCTAAGACG	326	117	0	0	22	45	0	0	8	1	51.9	1.72777	1338
BBS4_AAATAGGAAACTCTGGAGCT	111	67	30	12	38	63	71	15	85	28	52	1.72906	1339
CDK5RAP1_CCTAGAATTCCAATCCTCAG	164	23	1	119	55	27	7	20	104	0	52	1.73035	1340
INO80_CAGAGACAAATCGATATAGG	194	163	20	20	55	58	1	9	0	0	52	1.73164	1341
KATNA1_GGACAGCACTCCCTTGAAAG	135	110	99	8	65	7	21	41	33	1	52	1.73293	1342
KRTCAP3_GGCCCACCAAGATCAGCGCG	173	3	88	75	79	12	27	12	18	33	52	1.73422	1343
OR7E24_GATCCTCTGAGAGTCCCAGG	316	59	41	1	65	1	0	0	28	9	52	1.73551	1344
PSMB7_GCAGATACAAGAGCAACTGA	422	9	21	1	17	17	1	0	0	32	52	1.73681	1345
TAF10_GGAGGGGGCCATATCTAACG	87	56	66	45	106	28	40	1	86	5	52	1.7381	1346
CLEC4A_GCCCCTCACAAAAGTAATAC	157	73	64	55	2	41	25	64	40	0	52.1	1.73939	1347
GTF3C2_GGCACTGACCACACTCAGAG	278	69	20	28	25	26	23	1	14	37	52.1	1.74068	1348
MAGEB3_AGTAGCCCCCAAAATAAGAG	191	70	50	0	14	75	68	6	34	13	52.1	1.74197	1349
ALG11_AGAAACCAGCAAATGTCCTG	304	152	0	2	42	7	1	0	14	0	52.2	1.74326	1350
ANKFN1_CACAATCACAGGACTTACAA	247	18	94	68	40	30	0	0	0	25	52.2	1.74455	1351
DDAH1_GGCCCTCATCACCCGACCCG	246	129	1	0	72	49	1	1	22	1	52.2	1.74585	1352
GPR149_ACAGAAATTGGAAGTAACCG	102	85	81	22	77	42	44	41	19	9	52.2	1.74714	1353
NXF2_CCAGGAGAATGATGGAAGCG	95	99	148	0	36	0	101	0	23	20	52.2	1.74843	1354
PRRG1_GAGGCCAAAGATTAACGGAA	178	23	46	12	13	57	46	70	2	75	52.2	1.74972	1355
PTP4A1_TGAACAGCAATACAACAACC	234	81	49	88	23	11	0	4	0	32	52.2	1.75101	1356
RETSAT_GTCAACCACTACATGAAAGG	223	64	83	86	21	41	0	2	1	1	52.2	1.7523	1357
GULP1_AATTCTAGAACCCAAAACAA	219	57	20	26	61	67	16	5	23	29	52.3	1.75359	1358
PHB2_CCTCACAGCTGATCACCCAG	356	114	0	0	19	30	0	3	0	1	52.3	1.75488	1359
UBE3A_ATTAATCTTATAAAGCTCGA	123	77	90	102	21	38	12	20	40	0	52.3	1.75618	1360
ATP6V1D_GATCCTAAAGAAGATAATAG	269	79	26	2	9	89	0	17	1	32	52.4	1.75747	1361
CT47A8_AGAGGCGGTGGAGAAGGGAG	300	58	3	0	28	89	6	0	11	29	52.4	1.75876	1362
MAP3K2_GATAAACATTACCCATCCAA	157	80	110	33	4	43	10	0	51	36	52.4	1.76005	1363
NPM1_CAAAGATTATCACTTTAAGG	241	76	30	47	6	86	1	14	0	23	52.4	1.76134	1364
ZNF474_GGCCACAGATATAGCATACC	131	86	27	128	40	1	28	81	2	0	52.4	1.76263	1365
CENPC_AAGCCACAAACAGATCAGGT	357	38	1	27	15	34	1	0	0	52	52.5	1.76392	1366
LDHAL6A_TCTCTTTCTTAGTTCCTGTG	58	38	51	93	85	46	23	92	5	34	52.5	1.76521	1367
SOD1_GGAAAGTAATGGACCAGTGA	169	162	0	1	60	8	0	46	46	33	52.5	1.76651	1368
XIRP2_ATACTCTCAGTCAAACTATG	307	69	45	2	0	31	1	0	2	68	52.5	1.7678	1369
DNAJC1_CCACTAAGTCAAACAACTCC	199	53	89	8	36	26	15	15	59	26	52.6	1.76909	1370
EIF2S3_AGACAAGCCACAATTAACAT	431	32	2	0	21	0	3	2	0	35	52.6	1.77038	1371
FTH1_GGAGAGCGGGCTGAATGCAA	160	74	67	62	15	81	0	50	16	1	52.6	1.77167	1372
GTF2H2C_AACAGAGTATTTGAGCACCA	221	31	37	0	23	30	75	28	80	1	52.6	1.77296	1373
LGALSL_GGACGTGTACTTCCCACGAC	275	77	0	18	103	2	21	28	1	1	52.6	1.77425	1374
SOCS6_GGCATAAGTCCAATAACGAC	145	153	39	32	26	66	44	4	2	15	52.6	1.77555	1375
STK36_TGACATGACCAGCAATAAAG	224	109	20	34	46	8	26	9	49	1	52.6	1.77684	1376
ZNF766_GGTATCAAAGATATCAACAC	137	14	43	69	53	40	72	36	32	30	52.6	1.77813	1377
C15orf27_GAGCAAAAATACCTGCCACA	156	101	1	45	40	53	14	20	47	50	52.7	1.77942	1378
CLEC10A_GTGGCTACTCTCAACAACAA	201	40	44	38	46	23	42	66	24	3	52.7	1.78071	1379
DNAJC11_GAACCTAGACAAGAACACCG	202	49	24	0	57	115	1	12	0	67	52.7	1.782	1380
FAM81B_GCAAACCTCGAATTTAAAGA	183	28	95	2	45	39	3	0	52	80	52.7	1.78329	1381
MTHFS_GCAGCGCCAAGCGGAGCCTG	187	92	59	63	35	41	3	46	1	0	52.7	1.78458	1382
ARNT_CAAGCTAACCATCTTACGCA	247	88	55	2	32	43	15	15	5	26	52.8	1.78588	1383
CAMK2B_TCTCCATTGTCACCAAATGG	33	1	61	32	15	105	167	87	0	27	52.8	1.78717	1384
CLSPN_TAGATGTTTCCATTAAACCA	408	56	2	1	21	36	1	1	0	2	52.8	1.78846	1385
DSCC1_ACCTGACAGTCAAAAAGAGA	292	35	82	37	2	21	0	0	32	27	52.8	1.78975	1386
ING3_GAATTACAGAAATATTAGAG	164	144	10	26	59	79	1	2	13	30	52.8	1.79104	1387
MME_TCTCGGCATCCATCCAAGTG	51	124	79	159	47	39	0	14	15	0	52.8	1.79233	1388
RPL36_GTGGCTTTGCCCCGTACGAG	168	49	61	9	26	1	75	44	49	46	52.8	1.79362	1389
ZNF737_GACCATGAAGAAACATGAGA	176	62	37	33	41	94	21	13	49	2	52.8	1.79491	1390
APOC2_GGAGGACAAGAAACAGAGCT	124	119	52	5	75	22	12	23	47	50	52.9	1.79621	1391
C20orf202_GCGCCCACTGGGAGGACGCC	143	54	17	28	88	54	38	12	75	20	52.9	1.7975	1392
CDC20_TCCCAGAACTCCAATCCACA	282	0	2	20	57	84	23	8	3	50	52.9	1.79879	1393
FKBP3_GGTTATAGGCTGTAACCAAG	182	97	96	22	7	81	0	1	28	15	52.9	1.80008	1394
HADHB_TGGAGAACTCAGAAACCGCA	181	32	52	77	104	0	8	7	14	54	52.9	1.80137	1395
HMGCS2_ATCCACTATTGGGTACTCCG	243	69	21	0	80	90	8	3	14	1	52.9	1.80266	1396
PLEKHF2_CAAACAACATATTATTCCCC	224	17	10	24	107	77	3	4	52	11	52.9	1.80395	1397
TIGD3_GGGCACTGCCCGATACAGCA	353	54	2	6	21	41	1	8	9	34	52.9	1.80525	1398
OR52K1_CAAGCCATTGCACTACACGA	362	25	0	1	51	6	3	5	76	1	53	1.80654	1399
RINT1_GGAAGTAAACAAGTCAGTGA	146	108	1	6	63	70	14	44	21	57	53	1.80783	1400
TECTA_ACAGTGAAAATCTACCAGAG	78	153	47	37	44	60	4	19	47	41	53	1.80912	1401
ZNF789_AGAGTCATATAAGATATCAG	164	84	71	32	21	64	16	78	0	0	53	1.81041	1402
C17orf74_GAGAAAGAGGAGTACTGCGT	208	58	108	32	40	1	1	27	15	41	53.1	1.8117	1403
CLTC_GTACTCCAGACACTATCCGT	340	36	35	22	39	19	10	9	3	18	53.1	1.81299	1404
EEA1_ACTAACCAAGTCTAATATAG	256	127	45	3	24	24	1	27	24	0	53.1	1.81428	1405
GABRG3_AGACGTTGTCACGATTTCTG	33	22	0	101	22	3	126	173	50	1	53.1	1.81558	1406
KRCC1_TGGTCAAACATTCTATACGT	333	30	10	31	7	32	1	12	1	74	53.1	1.81687	1407
MRPS10_GACCTTTCACCAAAACCGAG	183	8	60	54	27	26	2	29	77	65	53.1	1.81816	1408
SAGE1_TCTGTCATATTAATACGCCG	213	84	9	13	31	61	1	51	22	46	53.1	1.81945	1409
FAM160A1_GGAGTCGCCATCATACAGGG	240	96	0	30	16	51	14	1	47	37	53.2	1.82074	1410
GABPA_CTCCAGAGAATTTCTCCCCG	159	224	37	41	29	0	1	18	9	14	53.2	1.82203	1411
GGT5_AGACGCTCAAGTTTGCCAAG	42	150	28	23	57	42	100	32	48	10	53.2	1.82332	1412
NAA35_AAGTAGCCTCTGGTTCACAA	309	92	1	19	38	7	0	1	38	27	53.2	1.82461	1413
POLR2A_GTCTGGAGCATACAACGTTG	383	37	2	47	23	1	11	0	27	1	53.2	1.82591	1414
RFC1_GGGCTCCAAAGAAATACCAA	137	72	80	38	50	14	38	44	0	59	53.2	1.8272	1415
RRM1_GGATCTCTTCATGAAACGAG	408	30	3	1	51	35	0	1	3	0	53.2	1.82849	1416
SLC7A9_TCTCTTTACCCAGCGTCGCG	55	107	35	26	49	52	30	55	81	42	53.2	1.82978	1417
ZNF534_AAGTCACTTAAAAATCAACA	233	32	3	19	112	30	31	17	0	55	53.2	1.83107	1418
ACOT7_GCGGCCAGATGATGCCAACG	112	176	21	2	121	26	3	1	54	17	53.3	1.83236	1419
ANAPC13_GTGAGGTTCAGAGAGATGGA	255	27	19	1	6	130	0	34	41	20	53.3	1.83365	1420
CDH10_GGTCCTAGGTAATAAAAACG	130	109	10	78	41	39	35	51	37	3	53.3	1.83495	1421
DPF1_GAAACGGTATAAGAACCGGC	197	67	15	35	23	72	12	30	35	47	53.3	1.83624	1422
RTFDC1_TCATCTCCAGGCCCACAACG	327	113	3	17	52	13	2	2	3	1	53.3	1.83753	1423
RPS7_GCCAAGATCGTGAAGCCCAA	181	42	2	29	109	69	7	0	42	53	53.4	1.83882	1424
SCUBE1_TGAGAATGACTACTACAATG	180	76	21	55	35	86	21	28	15	17	53.4	1.84011	1425
TAF6_GAGATAAAGGTACTGAACCG	179	98	0	49	33	0	43	66	34	32	53.4	1.8414	1426
INTS8_AACCAAAGAACTAATTGCAG	217	141	18	27	29	51	20	14	12	6	53.5	1.84269	1427
RBBP5_CCAGATAGATACCACTCCAC	215	110	1	62	26	56	1	21	41	2	53.5	1.84398	1428
RRN3_TCACCAATTTGAAACTACAG	227	112	63	53	16	1	12	3	0	48	53.5	1.84528	1429
SELPLG_ATCTAGGTACTCATATTCGG	197	112	2	28	55	58	19	8	55	1	53.5	1.84657	1430
UTP6_GCGATTCATTCCAACAAACC	235	98	69	50	35	6	4	16	20	2	53.5	1.84786	1431
ADCY4_GGAGAGGTTGGAAATCATGG	143	153	79	24	46	35	1	7	34	14	53.6	1.84915	1432
GOLGA6B_GGGAAAGCTCCAATCCCAGG	235	121	48	0	12	58	21	19	1	21	53.6	1.85044	1433
MMP19_CTCATGGCCCCAGTCTACGA	208	16	73	19	34	25	86	7	33	35	53.6	1.85173	1434
RSAD2_TGTCATTAATCGTTTCAACG	222	22	1	35	96	20	34	14	54	38	53.6	1.85302	1435
TOMM70A_TGAGAAGCTAGACAATAAGA	308	80	1	40	16	23	8	58	2	0	53.6	1.85431	1436
CPNE6_GGAAATCTATAAGACCAACG	143	117	19	17	22	45	66	26	20	62	53.7	1.85561	1437
FAM76B_AAATGTGAAGCAATTTGGGA	170	39	77	51	27	28	72	19	32	22	53.7	1.8569	1438
RPEL1_AATTTCTGCTCTCCAAACCC	273	61	13	16	50	52	1	1	19	51	53.7	1.85819	1439
RPL28_GGTGAATCAGTCCGTTGTAG	254	119	2	0	22	42	0	0	70	28	53.7	1.85948	1440
ZNF138_TATTCTCACCCAAGAAAACC	166	65	18	82	66	90	1	25	24	0	53.7	1.86077	1441
C2orf27A_GAGGCCGGTGGCTCTACAGG	349	64	12	0	11	87	0	14	1	0	53.8	1.86206	1442
DSC1_CTGGACCCGGAAATATCCAG	149	83	63	37	92	62	9	31	3	9	53.8	1.86335	1443
NT5E_CCTGATATTTGAGATGCTAG	189	72	1	38	49	111	30	7	34	7	53.8	1.86465	1444
RPL27_GGGATATCCACAGAGTACCT	302	97	13	11	78	15	6	15	0	1	53.8	1.86594	1445
TBC1D3L_AGAAACTAACAAGAAAGCAG	370	46	8	22	15	44	1	5	25	2	53.8	1.86723	1446
UGP2_GGGACACTCACTCAATATGA	259	139	0	33	44	36	2	19	2	4	53.8	1.86852	1447
C4orf36_TTTCAGCTATCAAACTCGAA	190	48	79	17	23	63	25	47	39	8	53.9	1.86981	1448
HMGCLL1_ACATGAATATTCCAGCACGA	227	86	64	2	56	66	17	1	19	1	53.9	1.8711	1449
NUP205_TCAATGGGTATTCTTCACAC	404	24	6	1	34	25	0	1	17	27	53.9	1.87239	1450
PLEKHA3_TTATCTAAAACAAACCAACG	173	57	54	28	26	100	0	2	98	1	53.9	1.87368	1451
ALG6_TCATAATCACCAAACATAGG	294	75	46	1	2	3	14	23	41	41	54	1.87498	1452
DAD1_TGAAGGGGAAGGTCCCCACG	219	88	3	25	32	73	36	0	38	26	54	1.87627	1453
FAM228B_ACTTTATAACTCCAAACGAG	167	8	122	63	10	0	27	38	3	102	54	1.87756	1454
GOLGA6L9_TCTTACCTCCAGATCCTGCA	298	65	49	36	27	32	6	25	1	1	54	1.87885	1455
GPR17_CAGATGCATCAGGAACACGT	270	73	0	25	10	59	49	12	19	23	54	1.88014	1456
KLHL24_AGTTATAAATCCAGACATCA	270	88	55	25	20	29	44	0	9	0	54	1.88143	1457
CCT5_CACCCAATCAGAATAGCCGA	300	32	0	1	94	110	0	1	1	2	54.1	1.88272	1458
ECD_GGATAATACACAATTCCCCA	297	71	19	16	82	17	0	5	6	28	54.1	1.88401	1459
ERICH3_GGTGCAAAAAACGTATACAC	227	19	32	69	14	58	4	3	49	66	54.1	1.88531	1460
NUP35_AGTATAAAAAGGATCCAACT	232	76	60	32	16	32	35	0	51	7	54.1	1.8866	1461
SHOX2_GGAGCTGAAAGATCGCAAAG	156	63	72	56	23	6	0	77	36	52	54.1	1.88789	1462
ALG11_CCCCCTATATACTTAAACAG	129	119	75	41	59	0	43	28	47	1	54.2	1.88918	1463
C2CD4C_TCTCCCCGCCACTGAAGTAG	100	79	16	7	90	95	53	23	21	58	54.2	1.89047	1464
CDK7_AGCTCCAAATAGTAACTCGG	311	53	2	52	57	32	1	5	28	1	54.2	1.89176	1465
Control_TCTCTCGGAGTGGAGCAACA	88	125	23	3	21	77	18	76	78	33	54.2	1.89305	1466
OR4F21_CTGGCCAGTAGAAAGTACAT	266	155	18	44	51	6	1	1	0	0	54.2	1.89435	1467
SP110_ATTTACAGAAGCTTCAAACG	144	92	78	34	25	72	7	44	27	19	54.2	1.89564	1468
TBC1D2_GGGTATTTAAGTAAGTTCGG	165	68	14	18	55	122	20	30	33	17	54.2	1.89693	1469
CCL7_ATAAGAAAATCCCTAAGCAG	188	119	34	28	28	28	42	14	19	43	54.3	1.89822	1470
CCT5_TGATTGCCATCGCAACAGGA	449	67	3	1	13	1	1	2	4	2	54.3	1.89951	1471
CIRH1A_GCTCTTCACAAGCGTCCCAG	292	104	20	4	38	60	1	5	17	2	54.3	1.9008	1472
ERH_ATACTTACACCAGGCAGCTG	348	85	2	0	20	38	0	4	8	38	54.3	1.90209	1473
L2HGDH_TCGTTGGTGGCGGAATTGTG	107	52	100	59	89	33	1	14	35	53	54.3	1.90338	1474
PRL_GCGGTCAAACAGGTCTCGAA	188	47	41	58	53	50	48	43	0	15	54.3	1.90468	1475
SPC24_GCTGGGCGCCAACCGCGCGG	359	95	12	0	38	2	1	1	33	2	54.3	1.90597	1476
THAP1_CTGCAAGAACCGCTACGACA	404	81	17	2	35	0	2	2	0	0	54.3	1.90726	1477
USF2_CCTGCACATACGGAGAGTAA	187	13	143	46	68	11	5	23	2	45	54.3	1.90855	1478
CLCC1_AGCTGTGGACATATGTACGT	247	67	87	0	26	39	10	1	46	21	54.4	1.90984	1479
LGI2_ACACAGCACATCAGAAACGG	176	121	112	12	58	27	2	23	13	0	54.4	1.91113	1480
MTDH_TACCACTTCTGATTATCAGT	343	46	9	0	58	62	0	11	15	0	54.4	1.91242	1481
PSMC6_CAGAATAAGAAACATTCCCA	425	3	41	17	3	27	1	1	1	25	54.4	1.91371	1482
TSPAN2_TATAAAAGCAAATACTCCAG	188	54	41	39	35	94	14	2	21	56	54.4	1.91501	1483
RPAP2_ATTCTGAAAGTGAATACAGT	185	150	29	50	32	0	34	34	31	0	54.5	1.9163	1484
TAC4_GCAGGAGGTGAAGACGGGCA	249	48	55	12	0	91	24	66	0	0	54.5	1.91759	1485
MRPL49_AGCGTCGTACAAAGTAAGGC	261	117	39	1	59	13	0	2	47	7	54.6	1.91888	1486
NINL_TCACTGGAGCAGAATTACCC	236	85	1	80	19	53	0	39	1	32	54.6	1.92017	1487
RPL30_TCTTCGATTACCTCAAAGCT	457	20	1	1	36	28	1	1	0	1	54.6	1.92146	1488
ATP6V1B2_TGCTGGGCTACCACACAATG	400	80	0	2	0	63	0	1	1	0	54.7	1.92275	1489
CHRAC1_GGTGTCCAGCATCAACCAGG	146	21	147	30	68	25	26	1	1	82	54.7	1.92405	1490
DAD1_GCTGTATATACTGCTGACCG	279	138	21	2	15	1	2	1	87	1	54.7	1.92534	1491
FAP_ATCTATTTGAAACAAAGACC	211	121	1	17	48	41	24	13	46	25	54.7	1.92663	1492
FBF1_AGACGGAAGTGACTTCTTGG	49	31	98	124	43	54	67	23	38	20	54.7	1.92792	1493
LMBR1L_GGGCCGGGTCTATGAGACAG	166	128	22	22	50	74	17	20	1	47	54.7	1.92921	1494
SBNO1_TGAGTAGAAAACGAGCATTG	212	60	81	41	36	34	0	5	46	32	54.7	1.9305	1495
TRNT1_ATTCGGATGATAAACAACAG	210	109	33	28	112	3	16	1	34	1	54.7	1.93179	1496
EPB42_GCCTTGCTGAACAAGCGCCG	169	57	47	82	21	43	25	10	54	40	54.8	1.93308	1497
SDAD1_CCTTTAGGGTAAGCCTACAG	260	91	52	63	20	46	0	7	8	1	54.8	1.93438	1498
SMIM4_TCCTCCCAGGACAAAAAAGA	141	105	0	26	63	83	36	10	42	42	54.8	1.93567	1499
SPC25_AGTACTGACTGCAAATATCC	259	168	1	10	21	15	0	13	24	37	54.8	1.93696	1500
TBL1Y_AAATCCTCCAAAGAACCGAG	140	79	57	12	17	104	0	42	95	2	54.8	1.93825	1501
ATXN7L2_GAAGGCCAACTCCCGCAAAG	142	62	82	56	56	33	29	25	63	1	54.9	1.93954	1502
DNAJC5_CAAGAACCCCGACAACCCGG	138	46	1	36	44	108	21	36	22	97	54.9	1.94083	1503
GTF2IRD2_AGGAAGATCACATTCAACCC	236	81	16	17	102	26	0	7	0	64	54.9	1.94212	1504
LACTB_TCTCTGGTTTACATGGTACA	25	59	79	50	28	2	97	120	37	52	54.9	1.94341	1505
NOL11_CTATTGCCTTCACCTTATAG	334	26	78	49	26	4	2	0	1	29	54.9	1.94471	1506
POLR2A_TGGGGGGTGACAATCATGCG	125	174	56	2	77	26	29	40	18	2	54.9	1.946	1507
UQCRQ_GAAAGAAAGACTCCCGAATG	91	86	96	44	32	92	21	24	62	1	54.9	1.94729	1508
ABCC3_TGAACCACCAGAAAAACAGG	205	49	18	1	56	126	27	12	27	29	55	1.94858	1509
EIF2B5_TGTGGATAGTACCACAAACA	340	123	14	0	24	37	1	2	9	0	55	1.94987	1510
NADK_GGTGGAAGGCCATGACCGGA	171	159	11	109	33	28	1	19	1	18	55	1.95116	1511
PIK3AP1_TATCAGCTATTATACTGACA	183	29	62	9	77	51	18	28	49	44	55	1.95245	1512
PRMT2_GGTGGCAGCGTAGTCCGCGA	163	57	0	21	36	89	44	38	49	53	55	1.95375	1513
RPA3_GGTTGGAAGAGTAACCGCCA	203	120	1	1	57	51	13	3	16	85	55	1.95504	1514
RSPH6A_GAGTACCCATCTGTGAACAC	238	33	71	73	3	87	0	3	21	21	55	1.95633	1515
AGMAT_TCTCCTGGACTGTAAGCGTG	124	103	78	98	31	1	43	48	22	3	55.1	1.95762	1516
CAP1_GGAGTTCCATACCACCGGAC	295	152	26	0	1	0	28	25	23	1	55.1	1.95891	1517
CBS_AGATATTCTGAAGAAAATCG	137	86	54	25	65	80	33	37	34	0	55.1	1.9602	1518
MMADHC_TTTCACTTACATATATCTGG	309	51	61	34	1	13	38	43	0	1	55.1	1.96149	1519
PDPR_CCTATCACCTCTCCAAAATG	201	0	43	138	21	34	34	33	9	38	55.1	1.96278	1520
RTEL1_CCTGCTCATACTCCACACAC	342	39	43	5	14	50	29	24	4	1	55.1	1.96408	1521
TCEA3_AAACAGCAGCAAATCAAAAG	256	42	17	1	34	57	68	10	0	66	55.1	1.96537	1522
THAP1_GAAAACTGAGAGATTAACAG	232	97	41	57	9	37	17	11	25	25	55.1	1.96666	1523
CDR1_CTATAGCTTCCAAAAAATCC	149	70	96	45	47	34	12	36	30	33	55.2	1.96795	1524
GLT8D1_TGCAGTAGATGGGAGACAAG	211	102	8	42	50	17	25	5	71	21	55.2	1.96924	1525
KIF3A_TGGGCAAGGATCAGACACAA	168	90	47	0	81	62	2	16	63	23	55.2	1.97053	1526
LOC101060321_AAGAAACTAACAAGAAAGCA	191	62	92	1	60	60	16	21	28	21	55.2	1.97182	1527
PCNA_GCTGGAGCTAATATCCCAGC	245	71	48	33	58	25	1	2	52	17	55.2	1.97312	1528
PUS10_GGAGATATAATAAATACTCC	127	25	112	33	21	71	38	47	34	44	55.2	1.97441	1529
RPS15A_ATCAACAATGCCGAAAAGAG	462	32	2	0	1	0	1	0	53	1	55.2	1.9757	1530
KIAA1598_TCAAATTGTATCTGTTCAGG	151	62	57	13	83	100	40	1	6	40	55.3	1.97699	1531
C1orf27_GCAGATTGGAAGTATCAAAG	151	65	26	109	82	24	59	2	33	3	55.4	1.97828	1532
CXCL6_TCTGTCAGCACAGCAGAGAC	81	92	148	55	73	51	21	8	0	25	55.4	1.97957	1533
FGFBP3_CACCGTCGCGGGATTCGCGG	367	11	1	27	41	24	27	30	8	18	55.4	1.98086	1534
KRTAP10-7_CCAGCAGTCTAGCTGCAAGC	210	36	124	1	73	99	8	0	1	2	55.4	1.98215	1535
OR4F29_GACCATGAACTGCAATCTGT	413	62	1	3	10	32	29	1	1	2	55.4	1.98345	1536
OR7G2_AGTCAGAGATGACAGCCAAG	211	128	1	77	10	65	30	1	31	0	55.4	1.98474	1537
RAF1_GCCGAACAAGCAAAGAACAG	106	93	98	0	47	47	52	56	55	0	55.4	1.98603	1538
RPS19_GTAGAACCAGTTCTCATCGT	292	74	0	52	6	23	77	27	0	3	55.4	1.98732	1539
TMC7_ACGGTAGATACAATATGAAG	126	213	67	11	24	58	1	9	32	13	55.4	1.98861	1540
TMEM88_CGCAGGTGCGCGGTGCAAGG	89	31	55	93	63	91	79	13	11	29	55.4	1.9899	1541
ZNF664_ACATAAGAAAATCCACACAG	154	76	64	33	57	13	29	67	20	41	55.4	1.99119	1542
ABHD5_GTGGAGATGTGCCCTAGGAT	81	52	1	61	36	75	37	111	57	44	55.5	1.99248	1543
CHMP4C_AATCCAGAGAGAAATCGCCC	189	38	22	51	51	62	85	37	20	0	55.5	1.99378	1544
CPSF7_GCAATTCTGTATACCTACAG	157	110	63	24	13	87	25	8	68	0	55.5	1.99507	1545
CYB5R2_GAGTGAGCCTAAAAAAACAC	163	2	46	114	33	78	41	50	28	0	55.5	1.99636	1546
ERCC8_GCCAAGATATAGTCATAACG	122	112	47	45	60	33	22	12	48	54	55.5	1.99765	1547
GJB1_GCCGCACCATGGCATAGCCA	199	60	54	57	101	20	26	35	0	3	55.5	1.99894	1548
GPR75-ASB3_GCATACTTACCTAAAAACAA	280	68	4	42	56	42	3	9	50	1	55.5	2.00023	1549
HID1_AACAAAAGAACTGAACCCAT	202	51	50	105	52	35	0	14	35	11	55.5	2.00152	1550
IL33_TGGCCTTATGATAAAAAAGG	180	69	15	28	44	67	112	22	14	4	55.5	2.00282	1551
OR2AT4_GGAGGAAAATAAAAAACACA	68	36	81	137	68	41	25	81	15	3	55.5	2.00411	1552
OR2C3_AGAAAACCATAAGCTATGGA	248	78	31	10	66	33	0	10	33	46	55.5	2.0054	1553
PRSS3_CCGCCACCCTAAATACAACA	213	97	41	49	33	41	0	67	0	14	55.5	2.00669	1554
RAB11FIP4_AGCCCGACTGAAAAACCTGA	221	47	84	40	7	53	33	57	1	12	55.5	2.00798	1555
RINT1_ATATAAGGATATCACTGACG	210	95	15	30	24	61	21	24	22	53	55.5	2.00927	1556
ABCB7_AGTCATTAAAAAGTATCACA	201	62	51	59	16	56	39	36	35	1	55.6	2.01056	1557
ATP8B2_ATTCATAGTGCGGAATCCAG	275	58	66	1	36	41	2	13	23	41	55.6	2.01185	1558
C2orf80_ATTAGGAAAATACCACTCCA	200	79	18	107	4	28	28	1	67	24	55.6	2.01315	1559
EEF1A1_ATTACAGGGACATCTCAGGT	305	88	0	23	77	22	0	18	4	19	55.6	2.01444	1560
MARK2_GTAACAACGCAGAAAATAAG	297	83	39	0	9	58	33	20	17	0	55.6	2.01573	1561
NBPF12_GAATGAGCTACAGTTCAAGG	338	98	2	1	40	28	0	2	10	37	55.6	2.01702	1562
SRSF2_GGGTATGACCTCCCTCAAGG	304	109	0	2	19	60	1	1	12	48	55.6	2.01831	1563
ZNF778_GCATGGAAAAACTCACACGA	244	113	49	18	10	63	36	3	10	10	55.6	2.0196	1564
CYP2U1_GTCCCGTCTGGAGACAACAA	204	1	33	22	65	43	36	21	60	72	55.7	2.02089	1565
LAIR2_ATAGAGGCAGCGATAAAGCC	154	57	83	28	32	102	4	29	67	1	55.7	2.02218	1566
PPP6C_TGAGAGTAGACAGATAACAC	168	101	0	1	82	57	21	3	80	44	55.7	2.02348	1567
RPS8_GCGCCCAGCTGCCAACACCA	349	60	0	30	10	52	0	0	2	54	55.7	2.02477	1568
SPTBN5_GGAACTGCAGAAACCGAACA	119	35	76	25	67	51	52	36	81	15	55.7	2.02606	1569
ADGRF1_AAAGACAATGTCATTACACT	297	14	0	53	36	33	40	13	67	5	55.8	2.02735	1570
AIMP2_TGTAACCAACATAATCCAAG	171	36	19	43	42	117	10	39	16	65	55.8	2.02864	1571
MAFF_CGCCGCACACTCAAAAACCG	324	52	52	12	20	49	10	31	2	6	55.8	2.02993	1572
MARS_GATCGGCAGACTTTACACTG	280	126	3	0	46	82	2	1	3	15	55.8	2.03122	1573
OR2M5_AGGGAAGTCACAGAAGAAGT	166	85	10	30	61	110	17	22	33	24	55.8	2.03252	1574
WDR74_GGGATGCTGGATCATAAACA	223	89	30	1	38	80	5	0	61	31	55.8	2.03381	1575
WSB1_TGTATTTATCCATATTCCAA	302	71	28	23	22	52	4	19	4	33	55.8	2.0351	1576
BRD8_TGGGACACAGACTCTACAGG	205	83	72	0	28	114	21	9	26	1	55.9	2.03639	1577
KCNJ15_GTCCCCATGAATAAACGCGA	245	104	31	12	11	53	21	26	1	55	55.9	2.03768	1578
NUP88_ACTTGATAGATTTCAAACAG	187	145	16	14	33	60	0	1	63	40	55.9	2.03897	1579
CCM2_GATACCTGAATCCCTCCAGT	189	113	12	11	64	82	0	16	47	26	56	2.04026	1580
ERAP2_GCCTCACCTGAAATACTATG	223	42	68	23	106	12	12	42	2	30	56	2.04155	1581
INTS9_CTAGCTCTGACAGTCCGGAA	203	106	0	20	75	84	29	1	38	4	56	2.04285	1582
NPBWR2_AGACGTTGGCACCCATCGTG	69	65	73	57	16	38	69	142	30	1	56	2.04414	1583
TLR10_TGGAAATCCTAGGTTTGAGT	257	146	21	4	32	40	13	3	1	43	56	2.04543	1584
AGGF1_ACAATAGTAATAAATTCCAG	192	133	47	30	34	18	23	21	37	26	56.1	2.04672	1585
CMTR1_ATATTAAACTCAATCAGCTG	194	214	36	10	16	48	1	21	15	6	56.1	2.04801	1586
CNPY2_TCTTTCCGGATCAATCCAGA	248	116	22	74	14	7	35	0	4	41	56.1	2.0493	1587
DAD1_TTATAGAACCATTACCCGCT	222	184	1	30	27	38	1	0	40	18	56.1	2.05059	1588
GOSR1_CCCTGATGCATACATTACAG	213	0	38	69	63	95	0	24	10	49	56.1	2.05188	1589
ITGA2_AAAGGCACCAATAGACACAT	247	66	37	118	9	29	39	1	2	13	56.1	2.05318	1590
SUPT6H_TGAATGTCCACAGGAGCATG	387	110	3	15	33	0	0	1	1	11	56.1	2.05447	1591
CKMT2_GTCATCAAACTAAGACACAA	213	127	56	0	55	28	59	22	1	1	56.2	2.05576	1592
EIF2S2_CCTCCACAAGTCGTCCGAGT	442	40	0	1	18	47	0	13	0	1	56.2	2.05705	1593
FAM200A_GATGGAACAGCAAATATGAC	212	60	17	2	63	44	1	25	67	71	56.2	2.05834	1594
MOB4_AGCTCATAAAACTCCAAAAG	182	101	29	67	43	29	0	0	39	72	56.2	2.05963	1595
OR6C75_CCAGGAATGAGAAGTTCCGA	88	99	36	141	40	33	0	95	29	1	56.2	2.06092	1596
SLC15A5_AAAAGGAATAAGTAAAACAA	227	77	56	51	47	2	1	46	22	33	56.2	2.06222	1597
DCLK3_ATGAGCAGGAGCAAACATGG	265	125	0	1	70	49	2	1	50	0	56.3	2.06351	1598
FER_CAGAACATGTATCGATTCGA	345	38	37	1	30	17	21	23	45	6	56.3	2.0648	1599
HTR2B_AGGCAGGACATAGAACAAGT	209	77	0	69	42	97	3	5	0	61	56.3	2.06609	1600
KIF27_CAGAAAGAGTAACCAAAACG	135	158	53	18	15	57	33	39	28	27	56.3	2.06738	1601
SUMO1_AGAATCATACTGTCAAAGAC	243	42	91	45	59	15	3	24	33	8	56.3	2.06867	1602
CALML6_AATGGGAGTTTACCATGAGA	193	57	57	88	53	24	44	40	8	0	56.4	2.06996	1603
DCLK3_TCTGGAAGAGAGGCACGCAA	330	35	74	8	82	22	11	1	0	1	56.4	2.07125	1604
EPRS_AATGTATATCAAAACACACG	236	0	79	34	46	95	26	40	0	8	56.4	2.07255	1605
LRR1_CTTAGACAGATATCCACAGG	263	132	1	3	32	81	2	36	1	13	56.4	2.07384	1606
PDE3A_GTTAGCTGCAGAAATAGCAT	179	71	51	69	70	36	1	53	34	0	56.4	2.07513	1607
TOR1AIP1_GGCCAAAGAAAGGTCCCCGG	107	62	84	97	6	75	40	5	76	12	56.4	2.07642	1608
TUBB8_CAAGGTGTCGGACACCGTGG	341	51	11	0	1	25	0	0	1	134	56.4	2.07771	1609
CDC23_GATATTTATCAATCTCACAG	318	68	18	1	42	42	2	0	50	24	56.5	2.079	1610
FAM134C_CGGGCACGCTGAGCAACCGA	325	14	0	43	123	54	1	1	1	3	56.5	2.08029	1611
FAM13A_TGAAAGAGTTGAATGAATCG	121	57	80	88	76	64	1	59	0	19	56.5	2.08158	1612
NEURL3_CGCTTCTGGGTGGACCGCCG	61	44	105	146	10	15	44	33	0	107	56.5	2.08288	1613
RRN3_GCCCGAGTGATCATTAAGGA	420	64	0	6	22	26	0	3	23	1	56.5	2.08417	1614
UBFD1_AGGAATTACCTGTAATCGAG	194	103	42	10	53	23	1	10	128	1	56.5	2.08546	1615
ZFP64_TTTGTAGCTCACAAGCAAAG	223	56	130	34	1	1	108	9	2	1	56.5	2.08675	1616
ZNF469_GAACCCCGAAATTAGCACCT	199	33	47	118	25	26	25	25	37	30	56.5	2.08804	1617
PDGFB_TGGGGCGGCACTGCACGTTG	179	171	55	45	7	18	54	12	25	0	56.6	2.08933	1618
RPS26_TGCAGCGAATAGGCTGCACG	45	56	92	108	30	45	63	59	11	57	56.6	2.09062	1619
TTN_AGAACCTGCAACAATCACCG	360	96	40	1	23	31	1	2	2	10	56.6	2.09192	1620
UBE2D3_GGGAAAATACTTGCCTTAGG	203	40	20	25	55	102	1	19	25	76	56.6	2.09321	1621
ATP5S_GGTGGATTATGATCGCATCA	198	122	12	17	38	136	19	14	0	11	56.7	2.0945	1622
KIAA1614_TGGATCCGGGAAACACACAT	200	89	46	19	85	21	11	29	66	1	56.7	2.09579	1623
TLR2_AAATCCTTACAAAACCCTAG	266	39	1	42	21	105	34	0	36	23	56.7	2.09708	1624
BAP1_GAACCGTCAGACAGTACTAG	328	29	17	23	18	38	2	11	15	87	56.8	2.09837	1625
DUOXA2_TCTGAAAGAGAATTACGCCG	166	157	64	64	68	9	8	31	1	0	56.8	2.09966	1626
HSP90AA1_GATCAAAAGGAGCACGTCGT	205	38	36	22	97	58	61	4	36	11	56.8	2.10095	1627
SETD1A_GAGATCTCCGACGACGACCG	259	72	0	0	63	100	9	1	63	1	56.8	2.10225	1628
SUV39H1_GCCGGGGGGTCTTTGACCGG	78	94	91	66	24	51	21	40	78	25	56.8	2.10354	1629
UPF3A_GGGCGGGCCTCACCTCAGGT	195	42	78	13	23	130	10	1	54	22	56.8	2.10483	1630
C22orf24_GATAAGAAATCCAAGGCTCG	88	108	44	101	43	24	78	47	1	35	56.9	2.10612	1631
DEFB115_AATCATGCAAAGAAATTGAG	272	63	40	73	18	9	1	37	52	4	56.9	2.10741	1632
GREM1_GGTCCCCAAGAGGAGAAGCA	108	199	1	65	25	12	48	61	39	11	56.9	2.1087	1633
IFNA8_TGATGATAAACAGTTCCAGA	318	22	1	17	50	114	34	1	1	11	56.9	2.10999	1634
IFT74_GAAGTTAATAAACTTCAGAA	151	95	82	32	26	23	31	58	32	39	56.9	2.11128	1635
MEA1_CCAAGATCCTGAACAAGAGG	174	47	59	54	95	59	66	6	0	9	56.9	2.11258	1636
MMRN2_GACACCGGCAAGGACCCCGT	134	50	27	147	85	19	50	1	18	38	56.9	2.11387	1637
MYC_CTTCGGGGAGACAACGACGG	265	112	1	22	58	34	0	2	26	49	56.9	2.11516	1638
MYO1A_ACATTTACTCACAAATCGGG	175	38	120	86	12	23	84	30	1	0	56.9	2.11645	1639
NICN1_CCTCGAAGGGAGCGACGCTG	277	38	43	19	45	32	41	1	18	55	56.9	2.11774	1640
OXA1L_TGCTGGGAATAGGAGCCGTG	180	135	7	9	72	104	24	3	6	29	56.9	2.11903	1641
PRND_CAGAATCAAGTGGAACCGGA	160	200	47	3	52	28	0	27	10	42	56.9	2.12032	1642
WDR82_TTACCTGGCAGTTAGGAGAC	104	138	38	10	60	27	0	26	32	134	56.9	2.12162	1643
MYRF_ACACCACCGAGCAATTGAAG	244	49	20	27	47	70	38	72	1	2	57	2.12291	1644
OR2L3_TTAGGAAAATGAAAACAATG	176	95	65	76	14	48	17	18	61	0	57	2.1242	1645
OR8S1_GAGGAAAACCATTTCAGTAG	246	70	23	14	88	105	1	0	11	12	57	2.12549	1646
POP5_CGTACGGGACACGATCGCCA	324	84	42	1	82	32	0	3	0	2	57	2.12678	1647
TRIM48_AATCTCGCAAGTCTTCCAGA	313	31	115	10	25	9	1	5	0	61	57	2.12807	1648
CORO2B_GCGGATCTGGGAGATCCCCG	87	16	21	60	96	70	29	50	42	100	57.1	2.12936	1649
CPNE5_GGTATTCTACAGAAGCAACG	225	51	24	24	24	112	26	0	38	47	57.1	2.13065	1650
FEM1C_AGATGCTCCATGATTTAACA	292	49	51	68	35	48	14	1	1	12	57.1	2.13195	1651
LIMD2_CCAGAAGACCGTGTACCCCA	201	58	22	49	23	60	2	0	108	48	57.1	2.13324	1652
LRP2BP_CTTATCCACCAAATTAGCAT	289	64	37	2	35	42	20	29	51	2	57.1	2.13453	1653
PIKFYVE_GGGCTGGCATCATAACAACC	121	28	165	86	43	21	45	11	51	0	57.1	2.13582	1654
PPP2R1A_TCACAGCACTGGACACTCGG	484	11	24	2	6	0	1	1	4	38	57.1	2.13711	1655
TAF2_TCCTGGAACTCAGAAATACG	293	117	32	20	30	66	2	10	0	1	57.1	2.1384	1656
TMTC3_CCGAGCAAATGAGTCCCGAC	140	90	0	0	37	113	2	38	34	117	57.1	2.13969	1657
CCDC74B_ATGGGGAACAGCCAGCACCA	275	3	9	1	22	96	42	39	66	19	57.2	2.14098	1658
DHPS_TAAGTGCGGGACTAAACACA	210	203	12	32	19	52	23	0	20	1	57.2	2.14228	1659
NUDT4_CGTGAGGGAAGTTTATGAGG	171	91	34	171	0	3	8	20	68	6	57.2	2.14357	1660
ZNF251_GGCAAACTCAAAGAGCGCGT	184	101	39	80	69	11	18	8	0	62	57.2	2.14486	1661
ACSM1_CAAGGTCTTTGACTTAACAC	233	69	68	3	53	69	22	5	44	7	57.3	2.14615	1662
CYLC1_AAGTCCAAAGATGAAAAAGG	242	17	72	42	36	45	24	17	59	19	57.3	2.14744	1663
EIF4EBP3_GTGGCGTATAGCGTGCCCCC	12	27	39	108	43	65	177	99	1	2	57.3	2.14873	1664
HIST2H3D_GGTAGCCAGCTGCTTCCTCG	354	76	21	11	20	22	44	0	24	1	57.3	2.15002	1665
PCNA_ATACGTGCAAATTCACCAGA	311	76	15	28	62	69	1	0	11	0	57.3	2.15132	1666
PPIP5K2_TTTGTGAAAGGTTTATACAG	246	54	22	49	28	83	42	34	13	2	57.3	2.15261	1667
SMC3_ACAAAAGCAGAAATAACACG	234	70	42	16	82	67	13	35	13	1	57.3	2.1539	1668
SNRPD2_TGTGAGCACAGAGAGTGGAC	421	31	32	1	21	47	1	1	18	0	57.3	2.15519	1669
CPSF6_ATATATTGGAAATCTAACAT	279	62	36	18	38	61	26	10	43	1	57.4	2.15648	1670
DBT_GATAAAGGGCCGAAAAACAC	189	66	13	28	64	76	29	17	61	31	57.4	2.15777	1671
IL7R_CCTGCAGAGAAAGCTCCAAC	150	49	70	75	0	46	27	67	2	88	57.4	2.15906	1672
PI4K2A_CCAGGGCCAGACCCAAACCG	197	211	0	15	21	74	0	0	56	0	57.4	2.16035	1673
POLR3H_TCCTCTCAAACTGCCAAGGG	289	118	1	16	35	92	0	1	21	1	57.4	2.16165	1674
WFDC2_GGCACAGGAGCAGAGAAGAC	144	103	67	67	28	29	100	6	24	6	57.4	2.16294	1675
ERAS_GAACCACCAGTGCTTCGTGG	214	84	77	13	20	109	3	40	14	1	57.5	2.16423	1676
LSM8_AGTATTCAGCTCTTCACAGG	372	38	2	39	45	11	1	11	17	39	57.5	2.16552	1677
NDC80_GGATCCCGGAATAGTCAACT	192	30	123	34	38	55	5	25	40	33	57.5	2.16681	1678
SCRN3_GCTGTAGTTCATGATAACCT	189	84	121	38	9	73	13	1	16	31	57.5	2.1681	1679
ACTRT3_GGCGGGCTAGAACTCTGCGT	218	48	63	25	33	127	42	20	0	0	57.6	2.16939	1680
BBIP1_ATTATATCTTCCACAAACAG	292	65	45	8	9	53	14	1	44	45	57.6	2.17068	1681
C19orf52_GCTGCTCCGGGACTACGCCG	163	161	71	0	46	41	2	56	16	20	57.6	2.17198	1682
CDCP1_GGTTTCAGATAAAATCTACG	215	183	6	37	44	7	12	41	27	4	57.6	2.17327	1683
DCAF13_ATTACATACAATATTAGGAA	290	36	39	41	61	41	1	0	28	39	57.6	2.17456	1684
EXOC6B_GTCTTGCAACAACCCAGAAT	150	39	131	0	58	10	37	1	81	69	57.6	2.17585	1685
FAM151B_GGGGATGGGCCATAATTGGC	164	20	97	74	69	0	37	71	2	42	57.6	2.17714	1686
RBL2_TAGAAACTGGAGTCACACAA	257	83	35	44	27	20	0	7	35	68	57.6	2.17843	1687
TINF2_CAGAATCTGGACCTATAGTG	229	56	0	30	84	87	2	0	53	35	57.6	2.17972	1688
CCDC141_CAAACTCATGAGTATTCTGG	217	221	36	36	34	13	0	10	8	2	57.7	2.18102	1689
DUX4_ACACCGGCGCGTGGGGAACG	490	18	1	0	26	38	0	0	1	3	57.7	2.18231	1690
IFNA14_TCTGCTGCATCATCTCATGG	309	98	6	24	5	97	1	13	23	1	57.7	2.1836	1691
KATNB1_GCTGAACCGGAGACACCGCA	242	128	2	0	36	96	1	1	44	27	57.7	2.18489	1692
PRDX1_GTCAATACACCTAAGAAACA	254	160	10	5	31	50	2	29	13	23	57.7	2.18618	1693
TREM1_GCTTGGCAGATAATAAGGGA	113	143	79	44	19	69	60	27	21	2	57.7	2.18747	1694
TTK_AAAGACAGGTTGCTCAAAAG	159	139	70	12	42	20	2	21	55	57	57.7	2.18876	1695
ZNF155_ACAGGACAGAAACCTTCCCA	242	128	0	1	65	46	0	5	87	3	57.7	2.19005	1696
BHLHA9_GGCCGCGCGCGGGGACACCG	166	217	46	2	100	35	2	7	2	1	57.8	2.19135	1697
BIRC5_CAAGTCTGGCTCGTTCTCAG	361	76	1	1	44	0	0	1	0	94	57.8	2.19264	1698
CENPF_ATTTGTCAGAAAATGAACAG	195	63	23	1	46	52	17	0	74	107	57.8	2.19393	1699
CTTN_ACTACTCCAAAGGATTCGGC	405	42	21	14	40	1	19	0	20	16	57.8	2.19522	1700
DSEL_TATTAAATTTAAATCCAAAG	242	41	73	5	32	49	26	22	53	35	57.8	2.19651	1701
FAM72C_AAACAAGTGCTCAGCTCTAG	252	166	22	50	17	1	40	4	14	12	57.8	2.1978	1702
FZD6_AGAGCCCAACAAACACACAA	285	23	107	15	40	18	0	12	1	77	57.8	2.19909	1703
PRKAG1_CTTCTTACTATCCCATAAAG	240	43	46	21	63	102	11	1	33	18	57.8	2.20038	1704
VEZT_ACATCAGATAAGATACGATG	287	113	0	46	21	8	0	1	62	40	57.8	2.20168	1705
C14orf178_GAAGATGGCGCTCACCAGGT	397	83	2	1	3	2	3	1	61	26	57.9	2.20297	1706
C8G_TGGGACTCACAGCTTTCGGA	204	12	76	2	31	134	18	29	41	32	57.9	2.20426	1707
CPLX4_AGAAAAATACAGGCTCCCAA	186	61	54	51	25	1	35	64	48	54	57.9	2.20555	1708
DCAF13_ACCAAGTTGGACTTACAGAG	262	157	0	7	42	46	13	0	52	0	57.9	2.20684	1709
GNGT2_CAAAGCGGGAAAGGAAATCA	176	83	62	80	86	43	10	4	14	21	57.9	2.20813	1710
POLR2J_GATGGTGAATAAACAGGCAT	260	51	39	1	28	71	1	11	43	74	57.9	2.20942	1711
SDAD1_CGTCATAATAACGTACCTTG	268	19	4	36	29	176	1	0	12	34	57.9	2.21072	1712
SNAPC3_TTACCTTATGAAATATAACA	403	33	0	14	39	56	20	3	2	9	57.9	2.21201	1713
TAS2R10_ATATTCAATTAGGTTACCGG	330	58	15	63	28	0	0	36	20	29	57.9	2.2133	1714
USP45_AGATTAATTATAATACAATG	272	55	84	32	21	35	1	1	51	27	57.9	2.21459	1715
C9orf57_TCTTCTTTACAGTACTGACC	265	78	33	44	24	9	44	16	1	66	58	2.21588	1716
FIGNL2_CTCCCAGGAACCAAATCGGG	102	74	31	0	51	83	111	38	87	3	58	2.21717	1717
OR5K1_ACACAAGAGAGTCTATACAA	265	67	47	37	31	44	20	28	1	40	58	2.21846	1718
PIGF_TATTGGAAACACACTTGACA	297	69	81	25	32	26	13	16	1	20	58	2.21975	1719
TAAR1_GATCACACACAGCATAGTAG	219	140	26	0	27	70	1	30	0	67	58	2.22105	1720
BMP4_CCTCATAAATGTTTATACGG	242	45	24	98	42	52	35	22	4	17	58.1	2.22234	1721
C7_CTGGTCGATTAATCTTCGGT	156	165	10	33	72	20	61	13	34	17	58.1	2.22363	1722
COMMD3_CTTGAAACATATCGACCCAG	187	115	68	1	48	36	16	10	84	16	58.1	2.22492	1723
DAPK2_AGTGCCGGGAGAAGAGCACG	150	60	109	69	10	33	43	52	31	24	58.1	2.22621	1724
E2F3_AATCTCCCTCAGAAAAAACG	201	87	57	59	101	14	5	27	2	28	58.1	2.2275	1725
H1FX_TGGTGGTGGAGACCATCCGT	271	137	25	22	28	30	1	3	50	14	58.1	2.22879	1726
NDUFB8_GAGAGATCCATGGTATAGCT	190	97	37	15	35	72	22	4	56	53	58.1	2.23008	1727
PLGLB1_ACGACGATGAAAATACCTGC	229	194	13	0	41	2	14	74	12	2	58.1	2.23138	1728
ANGPTL5_CTGATTAGATAAATAATCCA	182	96	7	50	115	22	9	34	5	62	58.2	2.23267	1729
EFCAB11_ACTTTAGAGACACTTACAGT	181	90	22	10	85	89	99	4	1	1	58.2	2.23396	1730
EIF3C_TGATATGGGACTCGAAATCA	208	205	90	12	10	43	2	0	1	11	58.2	2.23525	1731
INTS1_GTAGGTGCACAGATTCAGAA	185	155	0	25	53	56	43	0	29	36	58.2	2.23654	1732
POU4F2_TTGCAGAGCAATATATTCGG	166	179	47	49	74	1	8	19	25	14	58.2	2.23783	1733
REST_AATAGTCAGGAAGTGCCAAA	234	96	19	65	56	22	28	15	4	43	58.2	2.23912	1734
SFN_TATTGAGCAGAAAAGCAACG	179	143	49	61	36	41	0	26	45	2	58.2	2.24042	1735
SUPT4H1_GATGCATATCTACAAATGAA	334	99	57	11	42	5	0	1	33	0	58.2	2.24171	1736
TFEB_TGAAATGCAGATGCCCAACA	179	86	0	35	122	103	17	1	4	35	58.2	2.243	1737
THOC1_CTATCTGAAAACCCCCCCGA	183	154	11	14	39	126	23	17	1	14	58.2	2.24429	1738
TSPAN6_TCTGAAAACAAATCCTACGA	267	96	21	23	25	26	42	30	21	31	58.2	2.24558	1739
USP8_TTGTATACTGGGGATAACAA	318	105	2	13	24	31	0	0	13	76	58.2	2.24687	1740
ZMYM6_AACTAAGCGAGTCCATAAAG	169	67	45	19	77	45	63	83	14	0	58.2	2.24816	1741
BTF3L4_TGCATGACCAGTAATTGCAA	413	22	51	0	19	71	0	3	1	3	58.3	2.24945	1742
CT47A12_CTCAGATATCGGGCCCGCGA	275	97	2	57	53	58	2	19	1	19	58.3	2.25075	1743
DNAI2_GCAGCCACCCAGGAGTACGT	220	202	0	31	54	58	9	7	0	2	58.3	2.25204	1744
ERMN_GTTACATTCTAAACATGATG	293	15	61	59	75	15	3	0	30	32	58.3	2.25333	1745
IL12RB2_AGAACTTACCTGCCTCACAC	354	156	2	6	10	30	23	1	0	1	58.3	2.25462	1746
RPS13_CCAGCGCGCTACTTACAGTG	322	43	40	1	1	100	15	0	58	3	58.3	2.25591	1747
SYT7_CACTAGACTCACCTTCAAAG	290	11	41	28	26	57	29	14	58	29	58.3	2.2572	1748
TLR4_ATAAGTCAATAATATCATCG	229	135	35	12	45	47	16	47	11	6	58.3	2.25849	1749
TREM1_AATTCCCATCCAGTCCAAGT	274	64	32	36	72	79	0	3	8	15	58.3	2.25978	1750
ZBTB10_GGCATGATGAGCTTTCGCGA	234	81	27	36	62	57	46	0	0	40	58.3	2.26108	1751
DDTL_GGTGGACCCGCTCAGCGCCA	100	85	12	58	105	84	20	38	2	80	58.4	2.26237	1752
MTFMT_AGAGTTAATCGACAAACTGG	176	71	0	1	74	48	59	40	91	24	58.4	2.26366	1753
OR4F29_CAGGGAGTGACTGACACCAA	382	94	27	1	11	42	2	8	1	16	58.4	2.26495	1754
FAM200A_AGAGAAAATGGCTCACACAG	185	138	24	71	10	59	69	22	2	5	58.5	2.26624	1755
PICK1_CGGACCGCTGAGCTATACAA	233	171	1	61	0	50	0	0	26	43	58.5	2.26753	1756
TTC23_AGGTGGAGTTTCTCTCGAGG	158	94	44	52	80	12	76	52	6	11	58.5	2.26882	1757
UBFD1_AGCAACGGCGAAGACGCGGG	191	105	34	0	38	93	20	22	81	1	58.5	2.27012	1758
ZEB1_AATGCTTCACCCATACAACA	313	27	13	39	74	1	40	30	48	0	58.5	2.27141	1759
CYTH3_CGAGCCATTTAAGATCCCGG	168	119	67	95	26	97	7	4	1	2	58.6	2.2727	1760
EXOC8_ATGCTAAAATCAAACGAGAG	138	155	16	43	54	0	70	19	57	34	58.6	2.27399	1761
ODF3L1_CCGGCGCCCATACAGAGTGA	258	88	1	3	64	39	0	47	13	73	58.6	2.27528	1762
SULT1E1_CTTTATACATTAGAATCCCA	192	171	28	66	33	78	9	0	9	0	58.6	2.27657	1763
MORN5_CACAGGGAGCAAATATATCG	122	99	58	28	35	44	85	18	30	68	58.7	2.27786	1764
VSX2_GTGGCCAAGAGTACCTCGGG	187	9	76	65	102	43	24	53	16	12	58.7	2.27915	1765
ACAP1_GTCACAAATGCCGACAACGA	365	154	1	12	16	17	1	22	0	0	58.8	2.28045	1766
AK6_CAGGGAAGAAATCACAACCA	235	13	22	13	143	41	32	0	60	29	58.8	2.28174	1767
ANKMY2_AGGTAATAAAGACATCACAT	265	23	32	60	33	40	0	12	93	30	58.8	2.28303	1768
COMMD3_AAGAAACATCCGTTATATGA	301	105	28	5	52	37	3	2	19	36	58.8	2.28432	1769
FAM180A_AGAGCATCCCAGACATCCGC	274	104	69	0	69	19	1	16	35	1	58.8	2.28561	1770
HMMR_GGAGTCTCGAAGAGTCTCAA	158	0	67	11	63	126	50	11	63	39	58.8	2.2869	1771
MALT1_AATTCGTACACATCCACCAA	283	50	84	57	32	38	29	15	0	0	58.8	2.28819	1772
PHOSPHO2-KLHL23_TGTGTGTCCAGAACTAGAGA	147	94	72	16	88	59	47	2	55	8	58.8	2.28948	1773
RPS6_AGTGGTGGGAACGACAAACA	364	123	3	0	27	24	2	12	20	13	58.8	2.29078	1774
SETD6_CGCCAATCTAGAATACTCTG	215	152	19	37	40	32	11	0	54	28	58.8	2.29207	1775
SUCLA2_GATAGAAATAAATCCAATGG	115	79	80	1	37	25	86	55	58	52	58.8	2.29336	1776
TRAPPC10_CATTTCATACAACTCCAGCG	162	125	40	58	57	51	62	17	3	13	58.8	2.29465	1777
TRNT1_GTGGCAAAATCTATATCCTG	141	215	36	98	16	31	0	16	0	35	58.8	2.29594	1778
UBXN6_CTACACGTTCAACAAAGACC	247	126	1	20	72	26	2	8	77	9	58.8	2.29723	1779
BARHL2_TTCTATGGTAGGGACAAAGG	130	126	33	122	33	100	12	6	9	18	58.9	2.29852	1780
CTNNA1_TCTACTTGCTCAGTAAAACG	244	101	66	12	9	108	0	48	0	1	58.9	2.29982	1781
TBC1D23_AGACTCCTATGCACTCAACT	364	5	29	48	25	67	2	49	0	0	58.9	2.30111	1782
TTC19_GCCAACTTAGCATTTATACG	167	58	126	38	25	79	21	21	18	36	58.9	2.3024	1783
CCDC33_AGGAGATGAACAACTACCGG	177	52	37	124	34	93	68	1	0	4	59	2.30369	1784
CNOT7_CCAGTTTAAAAAACATGAGG	195	116	31	9	28	36	51	49	13	62	59	2.30498	1785
DCTN6_GGCCAATAGTGATTGGCGAA	148	68	98	3	76	98	0	8	42	49	59	2.30627	1786
EEF2_AGACACGCTTCACTGATACC	421	42	0	0	40	27	1	0	1	58	59	2.30756	1787
GDF9_ATTCAAATATAAGATCAGTG	320	39	49	21	20	8	43	29	26	35	59	2.30885	1788
KLK3_TCTCGTGGCAGGGCAGTCTG	71	164	89	27	0	33	115	47	42	2	59	2.31015	1789
MALT1_TGAGACCAAAAAGCTATACA	140	141	28	42	28	35	53	53	32	38	59	2.31144	1790
POLA2_ACAGCAATCAGGTCAAGCAG	327	68	2	40	12	77	1	1	18	44	59	2.31273	1791
KLHL33_CCCATGCCGGAAGCGTCCGG	187	103	66	0	113	22	10	25	44	21	59.1	2.31402	1792
OR6P1_TTGGGTCATGCAACCTACGT	271	106	15	2	55	53	1	11	43	34	59.1	2.31531	1793
ORC4_GTCCTTATTATCGGACCCCG	130	150	1	63	57	107	60	1	19	3	59.1	2.3166	1794
POLR2I_GAACCGCATTCTGCTCTACG	268	77	81	2	68	31	2	48	12	2	59.1	2.31789	1795
PSMB2_TTTATAAGATGCGAAATGGT	172	49	9	70	56	94	16	25	70	30	59.1	2.31918	1796
SLCO4C1_GCTGTTCCCAGAGTATAAAG	162	56	31	8	55	121	22	52	31	53	59.1	2.32048	1797
SMG9_GCTGAAATGAAGGAACGAGG	256	1	11	0	80	19	8	48	84	84	59.1	2.32177	1798
TNFAIP8_GGAGTACACCCAAAACAAGA	155	87	43	88	65	30	15	23	74	11	59.1	2.32306	1799
GRSF1_TAGAGGGAGGCGAAAAACAG	187	44	79	70	47	70	32	56	1	6	59.2	2.32435	1800
LBHD1_CCTTTAAGAACATTTAACGC	309	76	37	0	25	96	0	26	11	12	59.2	2.32564	1801
MRPL24_GGCAAGACCATGGATTACCG	221	47	19	110	0	49	0	1	32	113	59.2	2.32693	1802
MYL9_CCCCACAGACGAATACCTGG	220	56	48	12	51	136	29	31	0	9	59.2	2.32822	1803
PIGF_GGTCCTAACAAACATAAGCA	232	23	41	22	69	81	53	49	21	1	59.2	2.32952	1804
POLR3G_TATACTTACAGGAAATAGTG	336	85	16	52	26	31	31	10	1	4	59.2	2.33081	1805
TRAPPC4_TGGACACCGGGTAATTAGCA	304	78	40	2	58	28	36	42	1	3	59.2	2.3321	1806
COPRS_TGATGGAGAACTGAATACCT	169	39	76	29	84	71	24	34	25	42	59.3	2.33339	1807
ELF2_GACATGAACTATGAAACCAT	197	99	66	11	46	24	1	20	59	70	59.3	2.33468	1808
GTF2H2C_TAATATTTATGATCTAATCA	310	51	28	1	65	111	1	2	23	1	59.3	2.33597	1809
MLLT10_GCCGATAATGTCCAATACTG	211	237	2	1	41	1	13	17	0	70	59.3	2.33726	1810
OR8D4_ACCTGAGTATACAACCTCCA	250	50	128	19	34	2	3	6	36	65	59.3	2.33855	1811
UNC50_GGATAAAATGCAAAATGACC	189	146	0	131	38	45	2	19	22	1	59.3	2.33985	1812
C6orf229_GAAAATAAGTCTCAGCTGAA	187	12	65	87	26	130	2	1	52	32	59.4	2.34114	1813
ROBO2_GGCCGAACCACAAACTGTGG	148	77	25	39	109	52	27	43	68	6	59.4	2.34243	1814
RPL27_GTTCATGAAACCTGGGAAGG	222	112	55	54	51	1	22	8	48	21	59.4	2.34372	1815
TPX2_GAAGTTTCTAAAAAGTACTG	259	56	25	42	33	36	48	25	52	18	59.4	2.34501	1816
ANKRD46_GGGACTTTAATTATTCCAAG	87	56	96	41	56	13	81	43	86	36	59.5	2.3463	1817
CRIPT_CTTTGACTTCAAAAAAAGCA	176	7	134	74	52	32	45	25	33	17	59.5	2.34759	1818
PPP2R2D_AGAGTAATTAAACTCAACGG	142	68	25	21	97	106	82	24	28	2	59.5	2.34888	1819
ZMYM5_AATTTGTAGTAAATTAGCAG	193	18	30	28	74	39	71	116	13	13	59.5	2.35018	1820
CREBBP_CCGCAAATGACTGGTCACGC	159	125	1	42	88	103	19	16	1	42	59.6	2.35147	1821
GPBP1_GCTCTAGATTTAGGATTCGG	154	62	84	22	72	91	35	24	33	19	59.6	2.35276	1822
HMX1_GGTCGAAGGTGGATTCCAGC	240	75	54	32	118	21	1	20	35	0	59.6	2.35405	1823
HNRNPU_ATCGAGTTAGAGGACCAAAG	272	122	0	10	81	79	1	0	21	10	59.6	2.35534	1824
ITK_AACTATCACCAACATAATGG	282	108	2	25	36	68	18	10	46	1	59.6	2.35663	1825
RAB9B_GAAAGAATTTATTTACTATG	154	72	48	46	89	41	47	29	47	23	59.6	2.35792	1826
SPATA17_CATTGCTTTCTATTAATAGG	231	103	51	5	65	88	24	26	1	2	59.6	2.35922	1827
TMEM54_GAGTGTGGGCGACTTCCGGA	60	92	105	56	53	20	60	86	45	19	59.6	2.36051	1828
DAXX_GGAATGGGACCACCTCAGGG	163	128	53	39	91	34	15	8	43	23	59.7	2.3618	1829
HIST1H1B_GCTGCTTCTAAGGAGCGCAA	262	83	4	18	0	57	1	60	71	41	59.7	2.36309	1830
OCLM_TAAATCTTTAACAATAATGG	270	96	77	1	51	25	8	0	33	36	59.7	2.36438	1831
BYSL_GTATTATCTAAGTACCGCAG	270	104	1	2	84	57	6	11	41	22	59.8	2.36567	1832
GPN2_TGCAGTAGTGAGAATCCACG	268	131	1	2	81	114	0	1	0	0	59.8	2.36696	1833
NCKIPSD_AAGTACAGCCTGGAACAGCG	306	1	16	1	160	43	7	6	30	28	59.8	2.36825	1834
CCDC132_TGACATTAACCATTATACCA	324	24	39	63	18	50	1	8	2	70	59.9	2.36955	1835
CD3G_CAGAAGCCAAAAATATCACA	204	119	64	60	27	64	1	7	22	31	59.9	2.37084	1836
GAL_TTCAAGGCCAAGGAAAAACG	148	97	43	17	126	87	20	22	25	14	59.9	2.37213	1837
GJB5_GGGCGCCTCTACCTGAACCC	199	35	42	59	63	72	40	10	10	69	59.9	2.37342	1838
HSD17B12_TCTATTTCAGTGAACAACGT	238	110	39	0	36	1	51	9	94	21	59.9	2.37471	1839
TEX35_AGAGCTCAAGGAGAAAATGG	173	63	124	20	51	106	35	18	8	1	59.9	2.376	1840
CENPP_ACCACTCCACAAAAAAATGC	150	176	36	110	60	29	1	14	10	14	60	2.37729	1841
GOSR2_CCAGAAAGTTCACAACGGCA	346	186	1	2	41	22	1	0	0	1	60	2.37858	1842
IARS_GTTCTGGATTAAGAAGCGAT	213	18	92	32	56	112	0	1	0	76	60	2.37988	1843
C10orf99_CCCAACTCAACAAACCTGAA	218	124	5	36	51	95	13	45	2	12	60.1	2.38117	1844
CCDC81_TTCTCCACCATGATAAACAC	309	80	56	5	43	33	0	66	2	7	60.1	2.38246	1845
GHRL_GATGAACTGGAAGTCCGGGT	103	38	174	48	52	82	1	31	19	53	60.1	2.38375	1846
H3F3A_ACTGCCCGCAAATCGACCGG	389	46	1	3	13	29	0	3	88	29	60.1	2.38504	1847
MCL1_AGGCGCTGGAGACCTTACGA	417	69	0	0	7	73	25	0	9	1	60.1	2.38633	1848
MEAF6_CCAATAGCAAAAATGATCGA	220	84	15	59	82	23	68	22	17	11	60.1	2.38762	1849
NUP93_ACAATACAGATCCCTACAAG	302	115	1	3	30	80	1	2	32	35	60.1	2.38892	1850
PAIP2_ATTATAAATCTAGATAGAAG	240	29	56	60	41	40	1	21	79	34	60.1	2.39021	1851
RPLP1_AAAAGGCTCAACATTTACAC	425	67	0	1	28	24	1	0	0	55	60.1	2.3915	1852
TMEM26_TGCTCCAAGTCCATATAACA	383	15	1	24	67	15	27	54	14	1	60.1	2.39279	1853
BARHL1_GCGCCTGAAAAAGCCACGCA	93	163	95	59	51	14	9	36	82	0	60.2	2.39408	1854
BTC_AGGACACTCCACTTACACAC	363	45	18	11	5	33	1	32	78	16	60.2	2.39537	1855
CBWD5_TGAGGAAGAGGATCCTGCGG	146	150	15	43	32	87	59	66	0	4	60.2	2.39666	1856
MAP2K4_CCAGAGAATTCGGTCAACAG	183	35	22	42	88	68	68	43	35	18	60.2	2.39795	1857
PTGR2_AATAAACATCCACTCCAGCT	155	118	51	18	111	17	41	11	79	1	60.2	2.39925	1858
PTK6_GCCGACGCACAGCTTCCGAG	269	3	29	40	51	120	30	32	4	24	60.2	2.40054	1859
RBBP5_GGCAGCAATAGGGTCCACGC	284	91	5	82	1	56	36	26	0	21	60.2	2.40183	1860
TEDDM1_GCCCATCATCAGAATCAGAA	250	76	62	62	44	3	20	57	28	0	60.2	2.40312	1861
TLN2_GAACCTCAAGAATATCTCGA	298	66	68	3	15	57	27	6	31	31	60.2	2.40441	1862
YY1_GGAGACCATCGAGACCACAG	326	89	40	0	23	27	22	14	0	61	60.2	2.4057	1863
ZKSCAN3_GCCGACTCAGCGCCTCGCGG	208	44	27	128	35	118	13	14	2	13	60.2	2.40699	1864
ZMPSTE24_TTTGTGATAGAAGAAAAACA	191	170	2	16	64	98	47	11	2	1	60.2	2.40829	1865
GRB14_TCTCGAGCCGTTATGTCACT	35	1	174	86	26	71	145	15	1	49	60.3	2.40958	1866
PXK_TCTTCCGATCAGAACCAAAG	214	96	31	86	61	63	39	1	1	11	60.3	2.41087	1867
RASA4B_CCGACCAGTCCAAGAGCCGG	156	100	41	0	61	70	83	29	39	24	60.3	2.41216	1868
RPL10A_GGCCCAGGTTTAAATAAGGC	170	116	25	48	112	17	98	10	5	2	60.3	2.41345	1869
TMEM236_ACAGAACCAGAGATACGGGC	177	100	51	14	87	29	26	24	51	44	60.3	2.41474	1870
TWSG1_TCCAACTTCAAAGAGCACAG	189	42	3	83	36	89	2	158	1	0	60.3	2.41603	1871
C14orf39_AGAAATTAATTATTTAAACC	208	23	33	33	39	57	41	86	83	1	60.4	2.41732	1872
CNEP1R1_AATAGACCCTGAGACACAAA	206	134	94	3	15	91	14	10	37	0	60.4	2.41862	1873
FBXO3_TGTTCATACCGAATTCACAA	392	37	1	44	40	39	3	37	10	1	60.4	2.41991	1874
HOXB8_AGCCGCAGTCATAATAATTG	186	97	27	34	47	48	58	73	11	23	60.4	2.4212	1875
MAGEA3_GGTAGTTCATGGTAGTGGGG	197	71	10	1	69	39	88	30	53	46	60.4	2.42249	1876
RAE1_CATTCCCTAGATATACCCCA	350	119	0	4	16	109	0	5	0	1	60.4	2.42378	1877
UTP23_ATAAACATGAGAGGAACTCC	148	199	34	0	61	62	53	0	16	31	60.4	2.42507	1878
ADRA1B_TCTTGGCCACTATATAGACA	179	122	67	45	49	19	42	17	2	63	60.5	2.42636	1879
HAUS2_GTTCCTCATGTAGAAAAACC	270	96	14	10	46	28	8	12	41	80	60.5	2.42765	1880
PRAMEF15_TCTGCTTGACCCATAGAAGG	208	61	32	103	52	70	42	13	2	22	60.5	2.42895	1881
SLC25A17_ATTGTACCAACAAACTACAA	261	54	39	102	0	4	16	37	11	81	60.5	2.43024	1882
SSMEM1_CCCTGTAACCAACTCAGAAG	215	70	2	26	45	70	8	124	13	32	60.5	2.43153	1883
SUPT5H_CTGGGGGCTTAGATCACGGA	333	132	1	2	2	69	49	6	0	11	60.5	2.43282	1884
TIMP2_TTTATGGCAACCCTATCAAG	246	105	1	41	61	38	15	16	82	0	60.5	2.43411	1885
TMSB10_GGCAGACAAACCAGACATGG	229	56	113	117	44	0	0	4	42	0	60.5	2.4354	1886
TPT1_TGTCATGAACCATCACCTGC	296	162	1	42	45	37	0	3	1	18	60.5	2.43669	1887
XPC_AGTTTGAGACATATCTTCGG	239	95	16	27	62	38	31	0	63	34	60.5	2.43799	1888
CENPN_GCACTTGATCCATCTGTGTG	220	113	7	73	35	70	1	2	39	46	60.6	2.43928	1889
FUT7_GTGGCTAGGAGACTCCATGG	127	60	67	88	61	123	0	5	38	37	60.6	2.44057	1890
LRRN3_CCTATTAATAGAATACGAAG	238	118	44	25	29	71	1	16	37	27	60.6	2.44186	1891
MED31_CCAATATGAACACTTCCGAA	267	41	34	36	47	51	20	20	29	61	60.6	2.44315	1892
PPRC1_CTGGTGGGATGACAAGACAA	192	108	0	1	51	147	1	27	39	40	60.6	2.44444	1893
RPF2_TGGTAGTCATACATACGACC	349	119	34	3	32	29	4	1	25	10	60.6	2.44573	1894
WHSC1L1_GCTTCCATTACGATGCACAA	317	101	2	20	3	65	67	31	0	0	60.6	2.44702	1895
CXCL14_GAGCCTCATGCTGACCGGAG	240	66	41	49	15	62	6	24	104	0	60.7	2.44832	1896
PACRG_CAAAGCCCATCAAAAAACAG	117	31	130	44	9	77	132	5	34	28	60.7	2.44961	1897
SUPT6H_GCTGTGATTACCTAGACCGA	273	88	71	0	65	15	32	58	3	2	60.7	2.4509	1898
TANGO6_GAGATAGGGGCAGATACCCA	223	160	0	3	32	104	25	1	31	28	60.7	2.45219	1899
BRSK1_TCTCGGGCTTTAGGTCTCTG	71	188	42	40	102	76	71	4	13	1	60.8	2.45348	1900
ITPR1_CAAAGACGACATATTAAAGG	188	99	1	51	39	121	80	18	1	10	60.8	2.45477	1901
NELFCD_AGATGATTGCACATACCACG	433	36	27	17	2	32	1	1	46	13	60.8	2.45606	1902
OSGIN1_CTGGGCCGGAACCTCCCCGG	87	168	120	36	14	39	48	21	75	0	60.8	2.45735	1903
PDSS2_AGCTCTGCTACAGAACACCA	317	47	43	15	20	103	0	16	46	1	60.8	2.45865	1904
PSMC3_AGGCCATGGAGGTAGACGAG	319	191	0	1	71	21	1	1	1	2	60.8	2.45994	1905
SMKR1_GAAACAGAAGAAACCAGAAG	92	155	53	48	83	59	37	21	47	13	60.8	2.46123	1906
C15orf57_TACACTTCTGAATCCTGCAA	374	54	64	3	28	32	1	47	3	3	60.9	2.46252	1907
CD209_GAGCCCAGCCAAGAGCGTGA	174	180	31	127	35	0	24	16	19	3	60.9	2.46381	1908
NUP85_AGGCATATGCCGAATCATGG	341	157	2	31	25	38	0	7	0	8	60.9	2.4651	1909
RNASEH1_TCAGGGCATGAAAATCAACA	267	71	68	19	85	38	36	3	1	21	60.9	2.46639	1910
VAMP4_CATGCAAGAAAATATTACAA	104	61	60	105	73	14	20	71	87	14	60.9	2.46769	1911
CC2D2B_TTTAGCTATCGGAAATAAGG	227	135	10	55	46	84	9	14	0	30	61	2.46898	1912
F2R_GGAGCTGGTCAAATATCCGG	100	103	21	127	44	56	23	39	25	72	61	2.47027	1913
HPSE_TAAAAATGTCCAATACATCA	247	119	84	33	32	39	34	13	1	8	61	2.47156	1914
NDE1_AGCTGCAACAAATTGAAACC	140	47	21	46	60	143	25	63	28	37	61	2.47285	1915
NDUFAF3_CCCTTCCCTAGAGATCGTGG	301	25	13	2	63	68	39	42	29	28	61	2.47414	1916
NLRP8_CAAATCTAGGTAAAATACGG	204	60	5	6	36	30	43	54	79	93	61	2.47543	1917
POLR3K_GCACAACATCACCCGCAAGG	293	110	1	12	44	48	2	1	64	35	61	2.47672	1918
TANGO6_CATTATGATTACCATCAAAG	314	109	2	2	82	88	1	2	2	8	61	2.47802	1919
UTP14C_TGAGGCAGAAGAAAGACCAG	343	29	30	7	75	47	1	1	21	56	61	2.47931	1920
ATP5L2_GGGAGGAACCAGCTCAACCG	155	164	29	22	18	85	7	22	59	50	61.1	2.4806	1921
EZH2_TTATCAGAAGGAAATTTCCG	201	75	113	1	74	31	0	23	45	48	61.1	2.48189	1922
GPC5_TACAACCACCTCATTAACCC	380	4	14	66	18	71	11	14	31	2	61.1	2.48318	1923
LEO1_TGGATGAAGAAGGTAGAACC	192	177	33	17	63	36	11	2	43	37	61.1	2.48447	1924
SIRT2_TCTGGGAGAATAAGTTCCGC	158	65	53	63	75	105	12	27	10	43	61.1	2.48576	1925
SOWAHC_GGGCGACTCAGACAGCGCAT	255	65	19	3	63	103	11	0	33	59	61.1	2.48705	1926
SYNJ2BP_CAGCCGCATCAAAGAAAATG	101	131	49	60	35	68	57	50	43	17	61.1	2.48835	1927
CHEK1_TGGTATTGGAATAACTCACA	344	81	56	14	24	71	1	1	19	1	61.2	2.48964	1928
ICMT_AGAATAGTGGAACAATGACA	213	114	46	26	9	73	1	18	51	61	61.2	2.49093	1929
LCT_GGGCACCACACGAATCCAAG	356	103	13	56	0	15	0	0	21	48	61.2	2.49222	1930
NLE1_GTCCACGGGCACGTCGAACG	319	191	1	2	37	55	1	2	2	2	61.2	2.49351	1931
NPTN_GTCAGAAACTAAGCTCACGG	198	36	82	14	75	49	18	109	9	22	61.2	2.4948	1932
CCDC14_GCGAGATACAAAAACAGTGA	255	183	19	1	102	6	0	7	30	10	61.3	2.49609	1933
CHEK2_GCATACATAGAAGATCACAG	219	129	4	104	52	27	1	23	54	0	61.3	2.49739	1934
ELOVL6_CAGGTCCATTGTAAAAACCC	187	113	108	9	82	9	37	25	32	11	61.3	2.49868	1935
GLMP_GTTCCAAGAGAAATCGGCCA	158	70	92	57	50	61	17	23	84	1	61.3	2.49997	1936
ISOC2_CCCTGGACCTCCTAGACCGG	193	182	17	1	56	68	36	2	33	25	61.3	2.50126	1937
BBS1_CAGAAACCTCTAGGAAGACG	162	126	41	72	35	69	5	16	65	23	61.4	2.50255	1938
CFDP1_TGATGTAAATGAATTAGTGA	231	96	35	28	106	86	10	21	1	0	61.4	2.50384	1939
DDB1_GGATAGCCATCTGAATTGAG	250	90	13	11	104	51	52	4	0	39	61.4	2.50513	1940
DSG1_ATGACAAAGATCCCATATGG	162	139	72	23	53	74	3	18	11	59	61.4	2.50642	1941
RPL26_ATCTTCCTTCGAATGTGGGA	380	54	3	27	29	31	1	0	36	53	61.4	2.50772	1942
C9orf171_ATTATGGACTCTACATCCGA	252	195	16	7	92	40	1	0	2	10	61.5	2.50901	1943
KLHL42_TGAGTGTTACAACCCCGAGC	241	103	3	68	37	37	1	16	62	47	61.5	2.5103	1944
PPIAL4F_GCCAAGACTGAGTGGTTGGA	375	122	3	1	32	57	2	4	0	19	61.5	2.51159	1945
WDR72_TGGGACAATTATCATTACCC	183	79	147	66	63	26	1	16	0	34	61.5	2.51288	1946
WWP1_TAACACAAAAACAACCCAGT	357	95	1	17	70	61	0	13	0	1	61.5	2.51417	1947
CDK12_TGGCCTTCAAACTAGACCGA	282	153	40	15	60	56	3	6	1	0	61.6	2.51546	1948
GTPBP10_TCAGTTACTGAAATACCCAC	142	127	50	63	100	86	0	18	2	28	61.6	2.51675	1949
NEO1_TGACACCATCAGGATTACGT	464	66	0	1	40	40	3	1	0	1	61.6	2.51805	1950
NOD2_CCAAGTACCCTTATTCCAGA	206	112	19	55	62	28	30	51	53	0	61.6	2.51934	1951
NOM1_TCCCGGGCGAAAGCTCACCG	243	78	25	28	107	61	21	8	39	6	61.6	2.52063	1952
OR10J1_GGCACCTTTCTAGCACAGAA	273	174	13	20	6	65	40	4	14	7	61.6	2.52192	1953
PPA2_ATATGATTGTAGAAATACCT	311	64	16	9	74	76	8	1	38	19	61.6	2.52321	1954
RBP7_GAATTTGATGAAGATAACAG	235	106	22	33	53	74	0	9	28	56	61.6	2.5245	1955
WRB_ACGGATAAGCTCAAAACCCA	192	249	1	38	84	28	0	2	20	2	61.6	2.52579	1956
YARS_CGGGAACTTAAAATTTACTG	218	217	25	3	27	52	9	13	31	21	61.6	2.52709	1957
CD68_GGTTGGGCTAGGACTCGGAG	157	211	7	0	43	112	12	64	10	1	61.7	2.52838	1958
TIPIN_ATTGACAGAGTTGAATACCT	331	147	33	11	58	0	0	0	28	9	61.7	2.52967	1959
C8orf33_GGGACGCGCAGGGAGTACCC	188	76	19	31	93	65	0	45	101	0	61.8	2.53096	1960
C9orf171_TTATATCGCAATGAACCGCG	288	93	58	20	38	69	1	2	23	26	61.8	2.53225	1961
GRSF1_GGCCCCGTCCAAGTTAGAAG	176	85	107	13	44	113	16	16	36	12	61.8	2.53354	1962
HAUS8_GCAATACAGGACATTCGCCA	256	121	2	30	48	67	22	0	30	42	61.8	2.53483	1963
MRPL28_AATATATGCCAACAACGACA	274	75	1	40	88	51	1	23	17	48	61.8	2.53612	1964
POLR2B_TTAATAATGAAATAGCCACC	404	24	9	22	93	21	21	0	22	2	61.8	2.53742	1965
POTEM_TCATGTACACCAAGTAACAG	279	76	13	1	8	86	65	0	86	4	61.8	2.53871	1966
ZBBX_CTGATGCAGACAGTCAACGA	242	1	2	38	52	95	2	27	56	103	61.8	2.54	1967
DAP_GGGAAACTAGAGACTAAAGC	134	79	118	31	46	41	78	61	1	30	61.9	2.54129	1968
FOXD2_CTGGACGCTGGACCCGGAGT	218	59	90	12	70	18	32	55	65	0	61.9	2.54258	1969
PTCD1_CAGGAGCGTCAGGAAAACAC	222	89	79	0	45	30	58	31	38	27	61.9	2.54387	1970
RPL8_GCCCGTGTGAATGCCCTCGG	510	97	1	0	0	9	2	0	0	0	61.9	2.54516	1971
SDHC_CGGCCAAAGAAGAGATGGAG	172	38	50	11	85	159	21	39	35	9	61.9	2.54645	1972
SRSF1_GCTATGGCCCCCCATCCAGG	419	141	0	9	32	14	1	1	1	1	61.9	2.54775	1973
SUPT6H_GTTCGCCGTTTGGTAAAATG	228	89	138	1	35	57	3	23	35	10	61.9	2.54904	1974
EMC3_CACCAATAAGAATCATAGGG	263	54	11	15	62	74	17	1	87	36	62	2.55033	1975
FAM92A1_TGAAAAATTTCAGTCACAGG	145	37	114	16	41	53	86	30	38	60	62	2.55162	1976
GFM2_CAGGATCATTCATTTCCAAG	207	112	77	29	14	44	32	29	41	35	62	2.55291	1977
NOX5_AGGTCTATAGTGAAAAAAAG	164	68	37	92	63	92	46	17	40	1	62	2.5542	1978
ARF1_CACCCAGCTTAAGCTTGTAG	249	104	16	55	52	32	18	1	94	0	62.1	2.55549	1979
C15orf65_CCTTTGGAGTATAATTGCAG	128	195	56	42	45	94	2	1	37	21	62.1	2.55679	1980
DENND4C_GTTATACAAATCCACCACAG	194	120	10	18	45	42	95	31	30	36	62.1	2.55808	1981
DENR_AAAGAAGACCGTACCACAAA	256	74	37	14	37	18	45	8	88	44	62.1	2.55937	1982
INIP_GCATATTGCAGCCCAACAGA	263	102	1	26	70	46	10	0	61	42	62.1	2.56066	1983
MAPK1_GCTGACCTTGAGATCACAGG	367	147	1	14	30	20	3	1	37	1	62.1	2.56195	1984
MICU1_CCACCATCATTAGTCTTCGC	285	0	40	73	37	40	73	24	29	20	62.1	2.56324	1985
NSRP1_CTTCGATGCTAAGAGCAGTG	416	94	4	1	14	52	36	2	2	0	62.1	2.56453	1986
OR1L6_TGCCATAAAGAAGTACATCT	193	15	97	92	15	12	66	39	1	91	62.1	2.56582	1987
PSMA4_GACCCTAGTGGAAATTACGG	326	203	28	2	26	13	0	0	8	15	62.1	2.56712	1988
RNF19A_AAGACACAACCCAAGCATAG	339	119	19	53	28	47	11	3	0	2	62.1	2.56841	1989
RNF8_GGTTTCGAGAAATCATCAGG	243	194	1	6	78	51	1	2	46	0	62.2	2.5697	1990
C5orf49_CTTAAAAATACAATCATAGA	207	40	123	10	42	52	64	33	16	36	62.3	2.57099	1991
DNAJC16_TGAAACGGTCGCATCGACAG	225	9	98	50	62	119	5	29	1	25	62.3	2.57228	1992
EXOSC7_CTCCCGAGGACTAATGCAGA	191	272	2	7	39	33	2	31	40	6	62.3	2.57357	1993
HSPE1_ACCAATACTCGGTCAAAGAG	376	146	0	0	63	32	0	0	1	5	62.3	2.57486	1994
PCSK2_GGATTTGACCGAAAAAAGCG	144	29	87	38	62	94	16	20	58	75	62.3	2.57615	1995
RGS4_TAATGAATTCATCTCAGTCC	323	118	35	13	74	34	23	0	2	1	62.3	2.57745	1996
ARID1B_GTAATTATTAAACTCCGGGA	125	97	103	80	37	39	24	68	10	41	62.4	2.57874	1997
GLB1L2_TCTCCGCAGTACAAGCGTGG	133	57	81	2	90	100	63	1	56	41	62.4	2.58003	1998
IPCEF1_CCATCAGGAATCCACTACAA	237	147	42	8	80	0	21	1	47	41	62.4	2.58132	1999
[truncated: 75,442 more rows]
